# Supplementary material for: Substituted Cyclopentannulated Tetraazapentacenes
Source: PubMed Central journal article supplement (PMC9826220; doi:10.1002/chem.202201842), 2022-09-19
Supplement: CHEM-28-0-s001.pdf [file CHEM-28-0-s001.pdf]

# Chemistry–A European Journal

Supporting Information

## **Substituted Cyclopentannulated Tetraazapentacenes**

Steffen Maier, Robin Heckershoff, Nikolai Hippchen, Kerstin Brödner, Frank Rominger,  
Jan Freudenberg,\* A. Stephen K. Hashmi,\* and Uwe H. F. Bunz\*

**Table of Contents**

|       |                                                      |    |
|-------|------------------------------------------------------|----|
| 1     | Experimental Procedures .....                        | 2  |
| 1.1   | General Information .....                            | 2  |
| 1.2   | Synthesis of Compounds .....                         | 3  |
| 2     | NMR Spectra .....                                    | 11 |
| 3     | UV-Vis Spectra .....                                 | 19 |
| 4     | IR Spectra .....                                     | 23 |
| 5     | Crystallographic Data .....                          | 27 |
| 6     | Computational Details .....                          | 35 |
| 6.1   | Calculations of the Optoelectronic Properties .....  | 35 |
| 6.1.1 | FMO Calculations .....                               | 35 |
| 6.1.2 | Calculation of Theoretical Electron Mobilities ..... | 42 |
| 6.1.3 | NICS <sub>zz</sub> XY-Scans .....                    | 47 |
| 6.1.4 | Coordinates of the Optimized Geometries .....        | 48 |
| 7     | Device Fabrication and Measurement .....             | 65 |
| 8     | Stability Measurements .....                         | 66 |
| 9     | References .....                                     | 67 |

# 1 Experimental Procedures

## 1.1 General Information

Chemicals were bought from commercial suppliers (ABCR, Acros, Alfa Aesar, Carbolution, Chempur, Fluka, Merck, Sigma Aldrich and TCI) and used as delivered. Anhydrous solvents were dispensed from a solvent purification system MB SPS-800. Deuterated solvents were bought from Euriso Top and Sigma Aldrich.

Melting points (mp) were measured in open glass capillaries on a Stuart SMP10 melting point apparatus and are uncorrected.

$R_f$ -values were determined by analytical thin layer chromatography (TLC) on aluminum sheets coated with silica gel produced by Macherey-Nagel (ALUGRAM<sup>®</sup> Xtra SIL G/25 UV<sub>254</sub>). Detection was accomplished using UV-light (254 and 365 nm) or a TLC staining solution (vanillin).

Nuclear magnetic resonance (NMR) spectra were recorded at the chemistry department of Heidelberg University under the supervision of Dr. J. Graf on the following spectrometers: Bruker Avance III 300 (300 MHz), Bruker Avance DRX 300 (300 MHz), Bruker Fourier 300 (300 MHz), Bruker Avance III 400 (400 MHz), Bruker Avance III 500 (500 MHz) and Bruker Avance III 600 (600 MHz). CDCl<sub>3</sub> was filtered through a plug of aluminum oxide (ALOX) prior to use to remove acid impurities. Chemical shifts ( $\delta$ ) are given in ppm and coupling constants  $J$  in Hz. Spectra were referenced to residual solvent protons according to Fulmer *et al.*<sup>[1]</sup> The following abbreviations were used to describe the observed multiplicities: for <sup>1</sup>H NMR spectra: s = singlet, d = doublet, sept = septet, m = multiplet br = broad signal.

High-resolution mass spectra (HR-MS) were recorded at the chemistry department of Heidelberg University under the supervision of Dr. J. Gross on the following spectrometers: JEOL AccuTOF GCx (EI), Bruker ApexQe hybrid 9.4 T FT-ICR (ESI, MALDI, DART), Finnigan LCQ (ESI) and Bruker AutoFlex Speed (MALDI). For MALDI, *trans*-2-[3-(4-*tert*-butylphenyl)-2-methyl-2-propenylidene]-malononitrile (DCTB) was used as matrix.

Infrared spectra were recorded from a neat powder on a FT/IR spectrometer (Bruker LUMOS or Jasco FT/IR-4100) with a Germanium ATR-crystal. For the most significant bands the wave numbers are given.

UV-Vis spectra were recorded on a Jasco UV-VIS V-670. Fluorescence spectra were recorded on a Jasco FP6500. Quantum yields (QY) were recorded on a Jasco FP-8600 fluorescence spectrometer equipped with a ILF-835 100 mm dia. integrating sphere.

X-ray crystallography was carried out at the chemistry department of Heidelberg University under the supervision of Dr. F. Rominger on the following instruments: Bruker Smart APEX II Quazar (with Mo-microsource) and Stoe Stadivari (with Co-microsource and Pilatus detector).

HPLC was carried out on an Agilent 1100 series HPLC system (column: Merck LiChrosorb<sup>®</sup> Si 60 (5  $\mu$ m); solvent: hexane to hexane:DCM = 1:1, linear gradient; flow rate: 1 mL/min; UV detection at 254 nm). For flash column chromatography silica gel (Sigma-Aldrich, pore size 60 Å, 70–230 mesh, 63–200  $\mu$ m) was used as stationary phase. As eluents different mixtures of petroleum ether (PE), ethyl acetate (EA), dichloromethane (DCM) or MeOH were used.

All reactions were performed under air, if not otherwise specified. For handling of air and moisture sensitive reagents, standard Schlenk techniques with flame-dried glassware under an argon or nitrogen atmosphere were used.

1,4-Bis((triisopropylsilyl)ethynyl)phenazine-2,3-diamine (**S1**),<sup>[2]</sup> 4,5-dibromobenzene-1,2-diol (**S2**)<sup>[3]</sup> and 2,3,9,10-tetrabromo-6,13-bis((triisopropylsilyl)ethynyl)quinoxalino[2,3-*b*]phenazine (**S5**)<sup>[4]</sup> were synthesized according to literature procedures.

## 1.2 Synthesis of Compounds

### 2,3-Dibromo-6,13-bis((triisopropylsilyl)ethynyl)-5,14-dihydroquinoxalino[2,3-*b*]phenazine / 9,10-dibromo-6,13-bis((triisopropylsilyl)ethynyl)-5,14-dihydroquinoxalino[2,3-*b*]phenazine, mixture of tautomers (**1**)

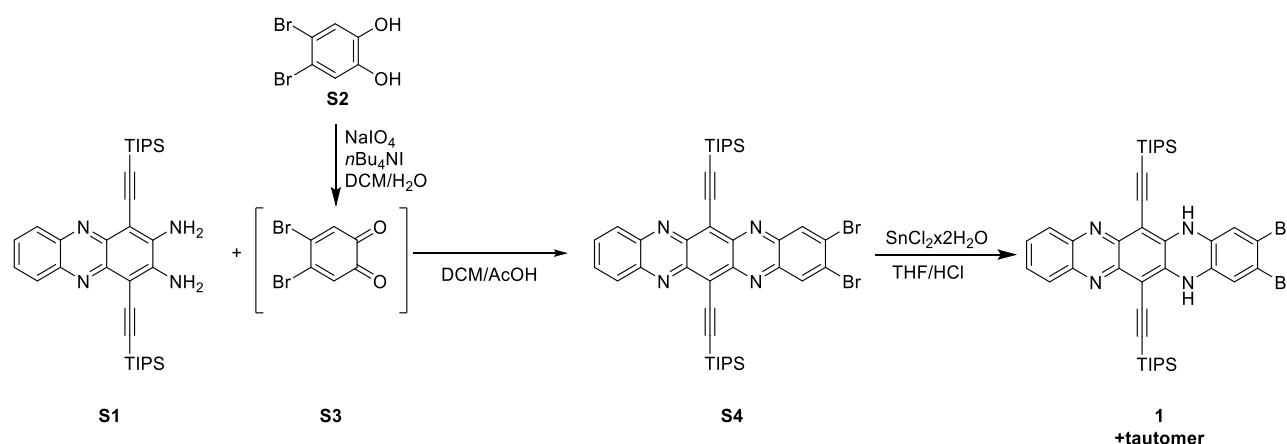

Diol **S2** (5.27 g, 19.7 mmol, 1.00 eq.) was dissolved in 100 mL of  $\text{DCM}$ . Subsequently, sodium metaperiodate (5.05 g, 23.6 mmol, 1.20 eq.) and  $n\text{Bu}_4\text{I}$  (243 mg, 787  $\mu\text{mol}$ , 4 mol%) were added. After addition of 100 mL of deionized water, the reaction mixture was stirred for 1 h at room temperature. The reaction mixture was extracted with  $\text{DCM}$  and the combined organic layers were dried over  $\text{MgSO}_4$ . After removal of the solvent under reduced pressure, crude quinone **S3** was dissolved in a mixture of 40 mL  $\text{DCM}$  and 40 mL acetic acid. After addition of diamine **S1** (5.00 g, 8.76 mmol, 0.44 eq) the reaction mixture was stirred at room temperature overnight. The end of the reaction was monitored by TLC. After completion, an aqueous solution of  $\text{NaHCO}_3$  was added to neutralize the solution. The aqueous phase was extracted with  $\text{DCM}$ , the combined organic layers were dried over  $\text{MgSO}_4$  and the solvent was removed under reduced pressure. The crude product was purified by flash column chromatography (silica gel, PE to PE: $\text{DCM}$  = 8:2 to 7:3) to yield dibromotetraazapentacene **S4** as dark green solid (4.72 g, 5.91 mmol, 67%, Rf: 0.40 (silica gel, PE: $\text{DCM}$  = 7:3)), which was used without further characterization. **S4** (4.72 g, 5.89 mmol, 1.00 eq) was dissolved in 200 mL of  $\text{THF}$ . A solution of tin(II)chloride dihydrate (13.3 g, 58.9 mmol, 10.0 eq.) in 200 mL of 6 M  $\text{HCl}$  was added dropwise. The reaction mixture was stirred at room temperature for 4 h and extracted with  $\text{DCM}$ . The combined organic layers were washed three times with a 2 M  $\text{NaOH}$  solution and dried over  $\text{MgSO}_4$ . After removal of the solvent the product was yielded as a mixture of tautomers (ratio determined by  $^1\text{H}$  NMR: 4:1) as a violet-golden solid (3.50 g, 4.37 mmol, 74%).

#### Tautomer A:

$^1\text{H}$  NMR (600 MHz,  $\text{CDCl}_3$ , 295 K):  $\delta$  = 8.16 (s, 2H), 7.20 (s, 2H), 6.82–6.79 (m, 2H), 6.52–6.49 (m, 2H), 1.25–1.24 (m, 42H) ppm.

$^{13}\text{C}\{^1\text{H}\}$  NMR (151 MHz,  $\text{CDCl}_3$ , 295 K):  $\delta$  = 144.6, 141.4, 140.4, 132.8, 128.0, 124.1, 123.9, 114.2, 105.1, 99.1, 96.7, 19.0, 11.5 ppm.

#### Tautomer B:

$^1\text{H}$  NMR (600 MHz,  $\text{CDCl}_3$ , 295 K):  $\delta$  = 7.93–7.92 (m, 2H), 7.58–7.56 (m, 2H), 6.98 (s, 2H), 6.65 (s, 2H), 1.25–1.24 (m, 42H) ppm.

$^{13}\text{C}\{^1\text{H}\}$  NMR (151 MHz,  $\text{CDCl}_3$ , 295 K):  $\delta$  = 143.3, 142.4, 138.2, 129.2, 128.9, 128.8, 117.8, 117.1, 105.7, 99.1, 98.6, 19.0, 11.5 ppm.

**Tautomer A+B:****Mp:** >300 °C.**R<sub>f</sub>:** 0.35 (silica gel, PE:DCM = 7:3).

**ATR-IR:**  $\tilde{\nu}$  [cm<sup>-1</sup>] = 3372, 2939, 2888, 2862, 2161, 2153, 2144, 2139, 2122, 2097, 1611, 1599, 1574, 1523, 1494, 1453, 1415, 1398, 1387, 1366, 1328, 1308, 1287, 1269, 1253, 1236, 1224, 1202, 1154, 1125, 1109, 1080, 1038, 1025, 1014, 993, 950, 918, 907, 880, 870, 842, 817, 809, 751, 730, 704, 669, 659, 645, 623, 587, 581, 552, 547, 534, 517, 503, 492, 485, 478, 455, 443, 430, 425, 420, 418, 410, 404.

**HR-MS** (MALDI pos.): m/z: [M]<sup>+</sup>: calcd. for [C<sub>40</sub>H<sub>50</sub>N<sub>4</sub>Si<sub>2</sub><sup>79</sup>Br<sub>2</sub>]<sup>+</sup>: 800.1935; found: 800.1940.

**2,3,9,10-Tetrabromo-6,13-bis((triisopropylsilyl)ethynyl)-5,14-dihydroquinoxalino[2,3-b]phenazine (2)**

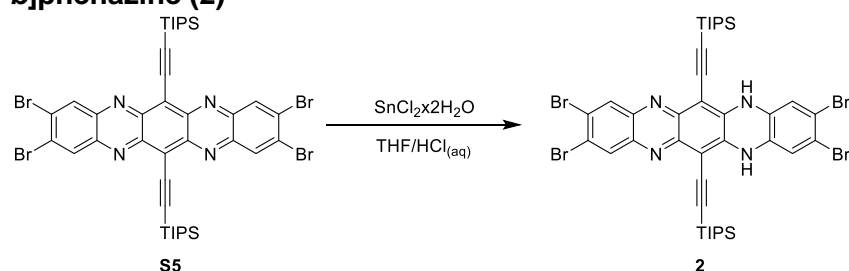

**S5** (1.20 g, 1.25 mmol, 1.00 eq.) was dissolved in 30 mL of THF. A solution of tin(II)chloride dihydrate (2.82 g, 12.5 mmol, 10.0 eq.) in 30 mL hydrochloric acid (6 M) was added dropwise. The solution changed the color from green to violet/blue. The mixture was stirred for 2 h at room temperature. DCM was added and the mixture was extracted with DCM. The combined organic layers were washed three times with a 2 M sodium hydroxide solution and were afterwards dried over MgSO<sub>4</sub>. After removing of the solvent, the product was yielded as a violet solid (1.12 g, 1.17 mmol, 93%).

**<sup>1</sup>H NMR** (300 MHz, CDCl<sub>3</sub>, 298 K):  $\delta$  = 8.19 (s, 2H), 7.08 (s, 2H), 6.68 (s, 2H), 1.25 (s, 42H) ppm.

The analytical data is in agreement with the literature.<sup>[5]</sup>

**4,5-Dibromo-2,9-bis((triisopropylsilyl)-2a,7,9a,14-tetraazadicyclopenta[fg,qr]pentacene (3a), 4,5-dibromo-2,8-bis((triisopropylsilyl)-2a,7,9a,14-tetraazadicyclopenta[fg,qr]pentacene (3b), 4,5-dibromo-1,9-bis((triisopropylsilyl)-2a,7,9a,14-tetraazadicyclopenta[fg,qr]pentacene (3c)**

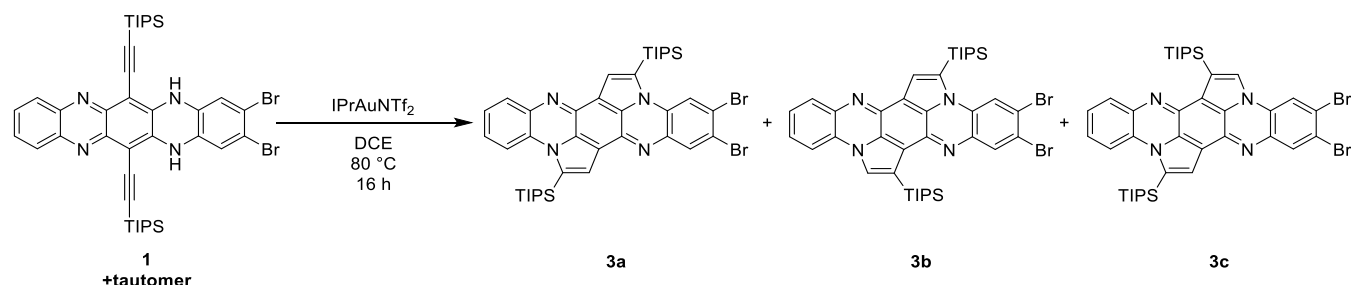

**1** (100 mg, 125  $\mu$ mol, 1.00 eq.) and IPrAuNTf<sub>2</sub> (10.8 mg, 12.5  $\mu$ mol, 10 mol%) were dissolved in DCE (15 mL). The reaction mixture was stirred at 80 °C for 2 d. After cooling to room temperature, the solvent was removed under reduced pressure and the crude product was purified by flash column chromatography (silica gel, PE:EA = 40:1) to yield a mixture of the two isomers **3a** and **3b** (ratio ~ 7:3) as a yellow solid (86.6 mg, 107  $\mu$ mol, 87%) as well as pure **3c** (6.2 mg, 7.72  $\mu$ mol, 6%). To obtain the

pure compounds **3a** and **3b** a part of the mixture was separated by preparative HPLC (ReproSil-Pur 120 Si, PE:EA = 20:1) to yield pure **3a** and **3b** as yellow solids.

**3a:**

**Mp:** >300 °C

**R<sub>f</sub>:** 0.20 (silica gel, PE:EA = 20:1).

**<sup>1</sup>H NMR** (600 MHz, CDCl<sub>3</sub>, 298 K): δ = 8.33 (s, 1H), 8.28 (s, 1H), 8.09–8.07 (m, 1H), 8.05–8.04 (m, 1H), 7.86 (s, 1H), 7.83 (s, 1H), 7.53–7.48 (m, 2H), 1.74 (sept, <sup>3</sup>J<sub>HH</sub> = 7.6 Hz, 6H), 1.25–1.21 (m, 36H) ppm.

**<sup>13</sup>C{<sup>1</sup>H} NMR** (151 MHz, CDCl<sub>3</sub>, 298 K): δ = 147.7, 146.2, 140.5, 140.2, 133.7, 132.0, 131.9, 130.4, 130.4, 130.1, 129.7, 129.5, 126.6, 126.3, 123.4, 123.1, 121.2, 121.1, 120.7, 117.3, 116.7, 116.1, 19.3, 19.3, 13.9 ppm.

**ATR-IR:**  $\tilde{\nu}$  [cm<sup>-1</sup>] = 2947, 2888, 2865, 1606, 1557, 1543, 1521, 1460, 1435, 1423, 1409, 1391, 1376, 1367, 1277, 1188, 1132, 1116, 1106, 1077, 1046, 1019, 1006, 990, 968, 906, 878, 846, 758, 746, 732, 706, 688, 676, 669, 661, 651, 634, 617, 610, 606, 593, 572, 555, 547, 542, 519, 499, 487, 482, 475, 468, 464, 459, 456, 452, 444, 418.

**HR-MS** (DART pos.): m/z: [M+H]<sup>+</sup>: calcd. for [C<sub>40</sub>H<sub>51</sub>N<sub>4</sub>Si<sub>2</sub><sup>79</sup>Br<sub>2</sub>]<sup>+</sup>: 801.2014; found: 801.2007.

**3b:**

**Mp:** >300 °C

**R<sub>f</sub>:** 0.26 (silica gel, PE:EA = 20:1).

**<sup>1</sup>H NMR** (600 MHz, CDCl<sub>3</sub>, 298 K): δ = 8.34 (s, 1H), 8.09 (s, 1H), 8.05–8.03 (m, 1H), 7.92–7.85 (m, 2H), 7.85 (s, 1H), 7.53–7.49 (m, 2H), 1.93 (sept, <sup>3</sup>J<sub>HH</sub> = 7.5 Hz, 3H), 1.74 (sept, <sup>3</sup>J<sub>HH</sub> = 7.5 Hz, 3H), 1.26–1.21 (m, 36H) ppm.

**<sup>13</sup>C{<sup>1</sup>H} NMR** (151 MHz, CDCl<sub>3</sub>, 298 K): δ = 148.6, 146.0, 140.5, 139.2, 133.5, 132.2, 129.9, 129.5, 129.2, 127.5, 127.0, 126.5, 123.1, 123.0, 121.1, 121.0, 120.9, 120.7, 118.8, 116.7, 114.4, 19.4, 19.4, 14.0, 12.5 ppm.

**ATR-IR:**  $\tilde{\nu}$  [cm<sup>-1</sup>] = 3154, 3138, 3131, 3115, 2954, 2941, 2888, 2864, 2754, 2741, 2728, 2715, 2359, 1581, 1553, 1520, 1500, 1488, 1479, 1456, 1429, 1406, 1382, 1363, 1340, 1289, 1198, 1164, 1155, 1123, 1111, 1097, 1077, 1073, 1052, 1019, 999, 987, 954, 920, 880, 858, 850, 845, 841, 819, 770, 748, 734, 706, 684, 666, 655, 650, 646, 638, 632, 621, 611, 599, 593, 580, 572, 563, 552, 547, 543, 538, 530, 502, 493, 489, 483, 475, 468, 463, 458, 444, 441, 433, 426, 421, 416, 410, 406, 403.

**HR-MS** (DART pos.): m/z: [M+H]<sup>+</sup>: calcd. for [C<sub>40</sub>H<sub>51</sub>N<sub>4</sub>Si<sub>2</sub><sup>79</sup>Br<sub>2</sub>]<sup>+</sup>: 801.2014; found: 801.2046.

**3c:**

**Mp:** >300 °C

**R<sub>f</sub>:** 0.50 (silica gel, PE:EA = 20:1).

**<sup>1</sup>H NMR** (400 MHz, CDCl<sub>3</sub>, 298 K): δ = 8.25 (br, 1H), 8.09–7.99 (m, 3H), 7.81–7.79 (m, 2H), 7.53–7.49 (m, 2H), 2.00 (sept, <sup>3</sup>J<sub>HH</sub> = 7.6 Hz, 3H), 1.74 (sept, <sup>3</sup>J<sub>HH</sub> = 7.5 Hz, 3H), 1.26–1.21 (m, 36H) ppm.

**$^{13}\text{C}\{^1\text{H}\}$  NMR** (126 MHz,  $\text{CDCl}_3$ , 298 K):  $\delta = 147.5, 147.0, 140.2, 139.6, 133.6, 132.3, 130.5, 129.7, 129.4, 129.2, 127.0, 126.4, 126.2, 122.8, 122.8, 122.3, 121.8, 121.4, 119.3, 118.8, 116.6, 115.5, 19.4, 19.4, 14.0, 12.5$  ppm.

**ATR-IR:**  $\tilde{\nu}$  [ $\text{cm}^{-1}$ ] = 2922, 2862, 1726, 1559, 1510, 1458, 1429, 1378, 1277, 1246, 1191, 1176, 1129, 1097, 1052, 1019, 996, 918, 880, 818, 801, 757, 744, 681, 664, 649, 620, 608, 582, 506, 496, 402.

**HR-MS** (MALDI pos.):  $m/z$ :  $[\text{M}]^+$ : calcd. for  $[\text{C}_{40}\text{H}_{50}\text{N}_4\text{Si}_2^{79}\text{Br}_2]^+$ : 800.1935; found: 800.1948.

### 11,12-Dibromo-1,8-bis(triisopropylsilyl)-2a,7,9a,14-tetraazadicyclopenta[fg,qr]pentacene (3d)

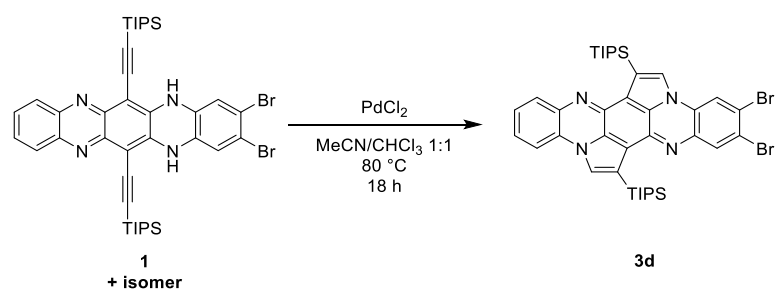

#### Micoscale synthesis:

**1** (120 mg, 150  $\mu\text{mol}$ , 1.00 eq.) was dissolved in 5 mL of a 1:1 mixture of chloroform and acetonitrile. Palladium dichloride (5.73 mg, 15.0  $\mu\text{mol}$ , 20 mol%) was added and the mixture was stirred for 18 h at 80 °C. The crude product was purified by flash column chromatography (silica gel, PE to PE:DCM = 9:1) to yield the product as a yellow solid (97.2 mg, 122  $\mu\text{mol}$ , 81%).

#### Gramscale synthesis:

**1** (1.33 g, 1.66 mmol, 1.00 eq.) was dissolved in 240 mL of a 1:1 mixture of chloroform and acetonitrile. Palladium dichloride (58.8 mg, 331  $\mu\text{mol}$ , 20 mol%) was added and the mixture was stirred for 18 h at 80 °C. The crude product was suspended in 50 mL DCM at 40 °C. Afterwards, a 1:1 mixture of acetone and PE (300 mL) was added and the precipitated orange solid was filtered off to yield the product (906 mg, 1.13 mmol, 68%).

**Mp:** >300 °C

**R<sub>f</sub>:** 0.70 (silica gel, PE:EA = 20:1).

**$^1\text{H}$  NMR** (600 MHz,  $\text{CDCl}_3$ , 298 K):  $\delta = 8.08\text{--}8.06$  (m, 2H) 7.94–7.93 (m, 1H), 7.90–7.86 (m, 2H), 7.75 (s, 1H), 2.01–1.96 (m, 3H), 1.95–1.90 (m, 3H), 1.21–1.20 (m, 36H) ppm.

**$^{13}\text{C}\{^1\text{H}\}$  NMR** (151 MHz,  $\text{CDCl}_3$ , 298 K)  $\delta = 148.4, 146.7, 139.6, 139.3, 133.4, 130.0, 130.0, 129.6, 127.3, 126.8, 126.8, 126.3, 122.7, 122.6, 121.8, 121.6, 121.2, 120.3, 118.7, 118.5, 118.0, 114.2, 19.3, 19.3, 12.4, 12.4$  ppm.

**ATR-IR:**  $\tilde{\nu}$  [ $\text{cm}^{-1}$ ] = 2956, 2953, 2939, 2926, 2923, 2899, 2896, 2886, 2884, 2860, 1558, 1555, 1508, 1507, 1496, 1494, 1486, 1480, 1477, 1473, 1472, 1465, 1464, 1458, 1456, 1431, 1382, 1364, 1360, 1285, 1255, 1195, 1186, 1105, 1071, 1066, 1053, 1020, 1008, 996, 994, 992, 919, 880, 878, 865, 845, 824, 786, 771, 763, 731, 697, 682, 679, 678, 672, 670, 668, 666, 663, 659, 655, 652, 645, 643, 638, 623, 620, 618, 611, 607, 605, 600, 593, 591, 588, 581, 575, 569, 564, 559, 556, 553, 551, 549, 548, 540, 537, 511, 507, 503, 499, 497, 494, 492, 491, 490, 488, 485, 480, 477, 474, 472, 471, 468, 465, 463, 461, 458, 454, 451, 450, 448, 443, 442, 440, 438, 437, 435, 433, 431, 429, 426, 424, 423, 421, 418, 416, 413, 411, 410, 407, 403.

**HR-MS** (MALDI pos.):  $m/z$ :  $[M]^+$ : calcd. for  $[C_{40}H_{50}N_4Si_2^{79}Br_2]^+$ : 800.1935; found: 800.1906.

**4,5,11,12-Tetrabromo-2,9-bis(triisopropylsilyl)-2a,7,9a,14-tetraazadicyclopenta[fg,qr]pentacene (4a),**

**4,5,11,12-tetrabromo-1,9-bis(triisopropylsilyl)-2a,7,9a,14-tetraazadicyclopenta[fg,qr]pentacene (4b)**

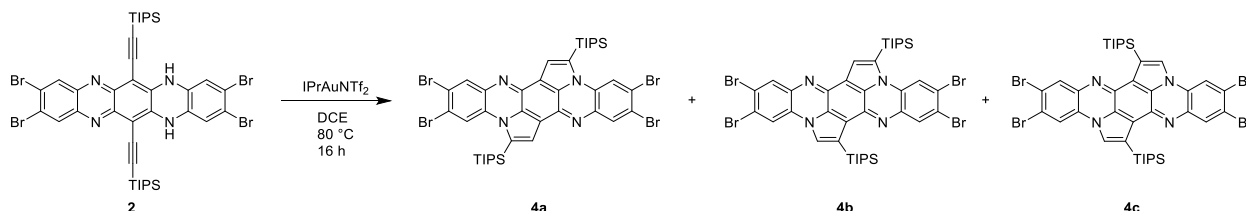

**2** (150 mg, 156  $\mu$ mol, 1.00 eq.) and IPrAuNTf<sub>2</sub> (13.5 mg, 15.6  $\mu$ mol, 10 mol%) were dissolved in DCE (30 mL). The reaction mixture was stirred at 80 °C for 2 d. After cooling to room temperature, the solvent was removed under reduced pressure and the crude product was purified by flash column chromatography (silica gel, PE:EA = 200:1 to 1:1) to yield **4a** as a yellow solid (48.2 mg, 50.2  $\mu$ mol, 32%), **4b** as a yellow solid (37.4 mg, 38.9  $\mu$ mol, 25%) and **4c** as a yellow solid (4.50 mg, 4.68  $\mu$ mol, 3%).

**4a:**

**Mp:** >300 °C

**R<sub>f</sub>:** 0.67 (silica gel, PE:EA = 20:1).

**<sup>1</sup>H NMR** (300 MHz, CDCl<sub>3</sub>, 298 K):  $\delta$  = 8.35 (s, 2H), 8.30 (s, 2H), 7.82 (s, 2H), 1.78–1.68 (sept, <sup>3</sup>J<sub>HH</sub> = 7.4 Hz, 6H), 1.25–1.23 (m, 36H) ppm.

**<sup>13</sup>C{<sup>1</sup>H} NMR:** Measurement was not possible due to the low solubility of the compound.

**ATR-IR:**  $\tilde{\nu}$  [cm<sup>-1</sup>] = 2952, 2921, 2852, 2356, 1737, 1594, 1554, 1513, 1457, 1431, 1410, 1391, 1377, 1363, 1280, 1260, 1252, 1188, 1170, 1162, 1115, 1099, 1075, 1051, 1020, 960, 919, 896, 879, 844, 839, 736, 677, 664, 593, 500, 454.

**HR-MS** (MALDI pos.):  $m/z$ :  $[M]^+$ : calcd. for  $[C_{40}H_{48}N_4Si_2^{79}Br_4]^+$ : 956.0146; found: 956.0152.

**4b:**

**Mp:** >300 °C

**R<sub>f</sub>:** 0.60 (silica gel, PE:EA = 20:1).

**<sup>1</sup>H NMR** (600 MHz, CDCl<sub>3</sub>, 298 K):  $\delta$  = 8.36 (s, 1H), 8.28 (s, 1H), 8.12-8.11 (m, 2H), 7.80-7.79 (m, 2H), 1.93 (sept, <sup>3</sup>J<sub>HH</sub> = 7.52 Hz, 3H), 1.73 (sept, <sup>3</sup>J<sub>HH</sub> = 7.51 Hz, 3H), 1.25–1.24 (m, 18H), 1.21–1.20 (m, 18H) ppm.

**<sup>13</sup>C{<sup>1</sup>H} NMR** (101 MHz, CDCl<sub>3</sub>, 298 K):  $\delta$  = 148.2, 147.0, 140.3, 139.5, 133.9, 133.7, 132.1, 130.5, 129.3, 129.1, 126.8, 123.2, 123.1, 122.5, 121.7, 121.7, 121.4, 120.8, 119.9, 118.9, 116.5, 19.4, 14.0, 12.4 ppm.



**ATR-IR:**  $\tilde{\nu}$  [ $\text{cm}^{-1}$ ] = 2950, 2942, 2924, 2894, 2884, 2865, 1736, 1716, 1596, 1548, 1518, 1465, 1458, 1441, 1420, 1410, 1391, 1384, 1358, 1279, 1261, 1184, 1162, 1121, 1105, 1094, 1078, 1062, 1045, 1018, 995, 973, 922, 876, 847, 836, 799, 768, 752, 736, 700, 668, 651, 627, 613, 602, 579, 569, 565, 561, 548, 540, 514, 501, 492, 486, 479, 475, 472, 468, 458, 454, 451, 442, 438, 433, 430, 427, 419, 414, 409, 404.

**HR-MS** (DART pos.):  $m/z$ :  $[\text{M}+\text{H}]^+$ : calcd. for  $[\text{C}_{40}\text{H}_{49}\text{N}_4\text{Si}_2^{79}\text{Br}_2^{81}\text{Br}_2]^+$ : 961.0183; found: 961.0145.

#### 4,5,11,12-Tetrabromo-1,8-bis(triisopropylsilyl)-2a,7,9a,14-tetraazadicyclopenta[fg,qr]pentacene (4c)

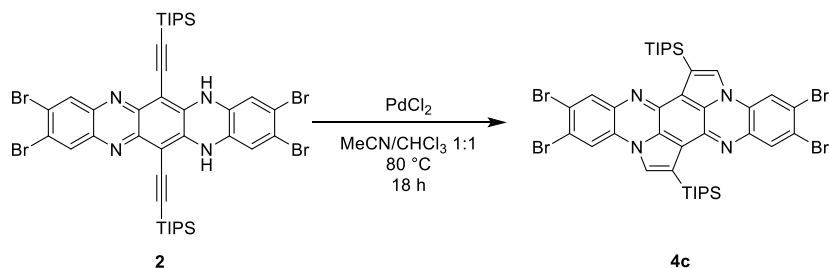

#### Micoscale synthesis:

**2** (20.0 mg, 20.8  $\mu\text{mol}$ , 1.00 eq.) was dissolved in 2 mL of a 1:1 mixture of chloroform and acetonitrile. Palladium dichloride (738  $\mu\text{g}$ , 4.16  $\mu\text{mol}$ , 20 mol%) was added and the mixture was stirred for 18 h at 80 °C. The crude product was purified by flash column chromatography (silica gel, PE to PE:DCM = 9:1) to yield the product as a yellow solid (15.0 mg, 15.6  $\mu\text{mol}$ , 75%).

#### Gramscale synthesis:

**2** (2.50 g, 1.66 mmol, 1.00 eq.) was dissolved in 500 mL of a 1:1 mixture of chloroform and acetonitrile. Palladium dichloride (46.1 mg, 260  $\mu\text{mol}$ , 20 mol%) was added and the mixture was stirred for 18 h at 80 °C. The crude product was suspended in 50 mL DCM at 40 °C. Afterwards, a 1:1 mixture of acetone and PE (500 mL) was added and the precipitated dark orange solid was filtered off. The procedure was repeated using THF (50 mL) and a mixture of DCM, acetone and PE for precipitation (equal amount, combined 500 mL). The corresponding brown solid was filtered off and dried under reduced pressure to yield the product (1.61 g, 1.67 mmol, 64%) as a dark orange solid.

**Mp:** >300 °C

**R<sub>f</sub>:** 0.95 (silica gel, PE:EA = 20:1).

**<sup>1</sup>H NMR** (300 MHz,  $\text{CDCl}_3$ , 298 K):  $\delta$  = 8.11–8.09 (m, 4H), 7.77 (s, 2H), 1.98–1.87 (m, 6H), 1.21–1.18 (m, 36H) ppm.

**<sup>13</sup>C{<sup>1</sup>H} NMR:** Measurement was not possible due to the low solubility of the compound.

**ATR-IR:**  $\tilde{\nu}$  [ $\text{cm}^{-1}$ ] = 2950, 2947, 2945, 2941, 2939, 2922, 2859, 1550, 1544, 1487, 1476, 1473, 1471, 1464, 1460, 1456, 1451, 1448, 1436, 1427, 1419, 1405, 1397, 1387, 1368, 1286, 1194, 1174, 1106, 1055, 1018, 995, 987, 916, 876, 839, 794, 768, 701, 699, 693, 679, 668, 665, 656, 654, 645, 643, 634, 626, 623, 620, 614, 613, 606, 595, 589, 587, 586, 584, 569, 567, 566, 562, 559, 550, 547, 546, 510, 508, 504, 502, 499, 495, 492, 488, 486, 484, 481, 479, 475, 471, 470, 467, 465, 463, 461, 459, 458, 457, 453, 451, 449, 447, 445, 443, 442, 440, 437, 435, 432, 429, 426, 424, 421, 419, 417, 415, 413, 409, 407, 405.

**HR-MS** (MALDI pos.):  $m/z$ :  $[\text{M}+\text{H}]^+$ : calcd. for  $[\text{C}_{40}\text{H}_{47}\text{N}_4\text{Si}_2^{79}\text{Br}_2^{81}\text{Br}_2]^+$ : 959.0026; found: 959.0020.

### 1,8-Bis(triisopropylsilyl)-2a,7,9a,14-tetraazadicyclopenta[fg,qr]pentacene-4,5,11,12-tetracarbonitrile (**5c**)

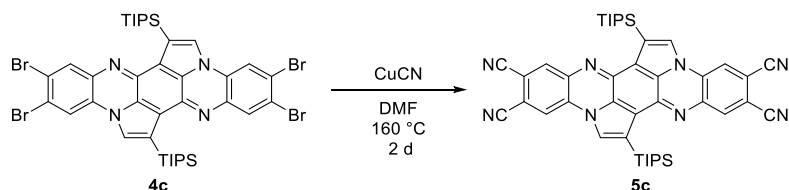

A mixture of **4c** (82.0 mg, 85.4  $\mu\text{mol}$ , 1 eq.) and CuCN (122 mg, 1.37 mmol, 16 eq) in DMF (10 mL) was stirred at 160 °C for 2 d. The solvent was removed under reduced pressure and water (20 mL) was added to the residue. The mixture was extracted with DCM, the combined organic layers were washed with water and brine and dried over Na<sub>2</sub>SO<sub>4</sub>. The solvent was removed under reduced pressure and the residue was purified by flash column chromatography (aluminum oxide, PE:DCM = 3:2 to 1:2). After further purification by recrystallization from DCM/MeOH and DCM/pentane, the product was obtained as a red-orange solid (46.7 mg, 62.7  $\mu\text{mol}$ , 73%).

**Mp:** >300 °C

**R<sub>f</sub>:** 0.60 (silica gel, PE:EA = 5:1).

**<sup>1</sup>H NMR** (301 MHz, CDCl<sub>3</sub>, 298 K):  $\delta$  = 8.28 (s, 2H), 8.26 (s, 2H), 7.93 (s, 2H), 1.91 (sept, <sup>3</sup>J<sub>HH</sub> = 7.3 Hz, 6H), 1.20 (d, <sup>3</sup>J<sub>HH</sub> = 7.5 Hz, 36H) ppm.

**<sup>13</sup>C{<sup>1</sup>H} NMR** (151 MHz, CDCl<sub>3</sub>, 323 K):  $\delta$  = 149.8, 141.7, 135.4, 130.3, 129.3, 124.3, 122.8, 122.0, 120.3, 115.2, 115.2, 113.1, 112.8, 19.3, 12.5 ppm.

**ATR-IR:**  $\tilde{\nu}$  [cm<sup>-1</sup>] = 2943, 2862, 2230, 1792, 1741, 1607, 1542, 1494, 1481, 1462, 1439, 1415, 1385, 1358, 1310, 1284, 1247, 1206, 1181, 1120, 1093, 1022, 996, 919, 897, 882, 872, 807, 777, 753, 699, 664, 648, 612.

**HR-MS** (MALDI neg.): *m/z*: [M]<sup>-</sup>: calcd. for [C<sub>44</sub>H<sub>48</sub>N<sub>8</sub>Si<sub>2</sub>]: 744.3546; found: 744.3557.

### 1,8-Bis(triisopropylsilyl)-4,5,11,12-tetrakis((trimethylsilyl)ethynyl)-2a,7,9a,14-tetraazadicyclopenta[fg,qr]pentacene (**6c**)

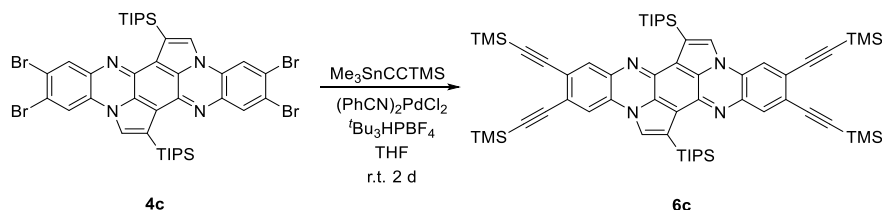

**4c** (50.0 mg, 52.1  $\mu\text{mol}$ , 1.00 eq.) was dissolved in 20 mL of dry THF under an argon atmosphere in a flame dried Schlenk tube. The solution was degassed using an argon flow for 30 min. Afterwards, the stannane (204 mg, 781  $\mu\text{mol}$ , 15.0 eq.) was added and the mixture was degassed for additional 10 min. Tri-*tert*-butylphosphine tetrafluoroborate (3.02 mg, 10.4  $\mu\text{mol}$ , 20 mol%) and bis-(benzonitrile)palladium dichloride (2.00 mg, 5.20  $\mu\text{mol}$ , 10 mol%) were added and the mixture was stirred at room temperature for two days. Water was added and the mixture was extracted with DCM. The combined organic layers were dried over MgSO<sub>4</sub> and the solvent was removed under reduced pressure. The crude product was purified by flash column chromatography (silica gel, PE:DCM = 9:1 to 4:1) to yield the product (17.0 mg, 16.5  $\mu\text{mol}$ , 32%) as an orange solid.

**Mp:** >300 °C

R<sub>f</sub>: 0.45 (silica gel, PE:DCM = 8:2).

**<sup>1</sup>H NMR** (600 MHz, CDCl<sub>3</sub>, 298 K): δ = 7.91–7.90 (m, 4H), 7.80 (s, 2H), 1.97–1.92 (m, 6H), 1.21–1.19 (m, 36H), 0.35 (s, 36H) ppm.

**<sup>13</sup>C{<sup>1</sup>H} NMR** (151 MHz, CDCl<sub>3</sub>, 298 K): δ = 147.7, 139.1, 133.3, 129.8, 129.2, 128.4, 126.5, 125.4, 124.0, 123.4, 123.0, 121.2, 118.8, 117.9, 103.1, 102.8, 100.4, 98.9, 19.4, 12.4, 0.3, 0.2 ppm.

**ATR-IR:**  $\tilde{\nu}$  [cm<sup>-1</sup>] = 2941, 2862, 2157, 1609, 1543, 1491, 1460, 1435, 1386, 1292, 1248, 1198, 1147, 1103, 1045, 1022, 993, 913, 840, 759, 685, 661, 647, 634, 614.

**HR-MS** (MALDI pos.): m/z: [M]<sup>+</sup>: calcd. for [C<sub>60</sub>H<sub>84</sub>N<sub>4</sub>Si<sub>6</sub>]<sup>+</sup>: 986.4778; found: 986.4806.

## 2 NMR Spectra

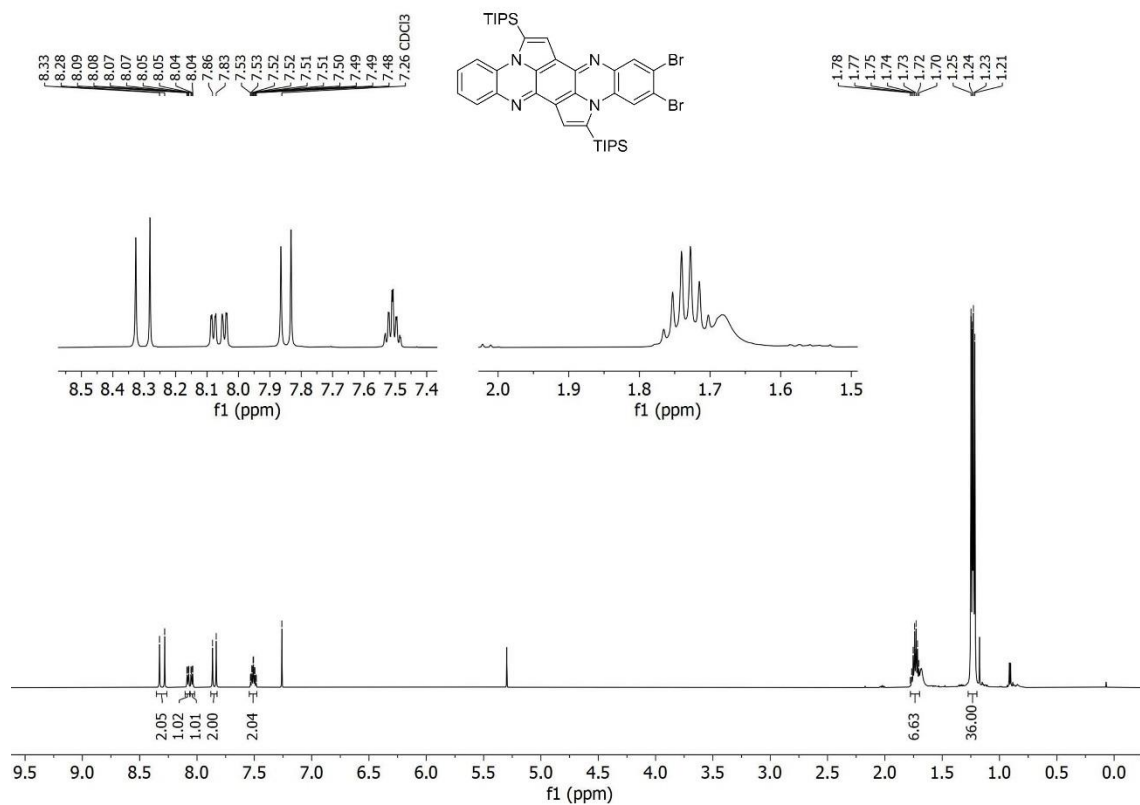Figure S1.  $^1\text{H}$  NMR spectrum (600 MHz,  $\text{CDCl}_3$ ) of **3a**.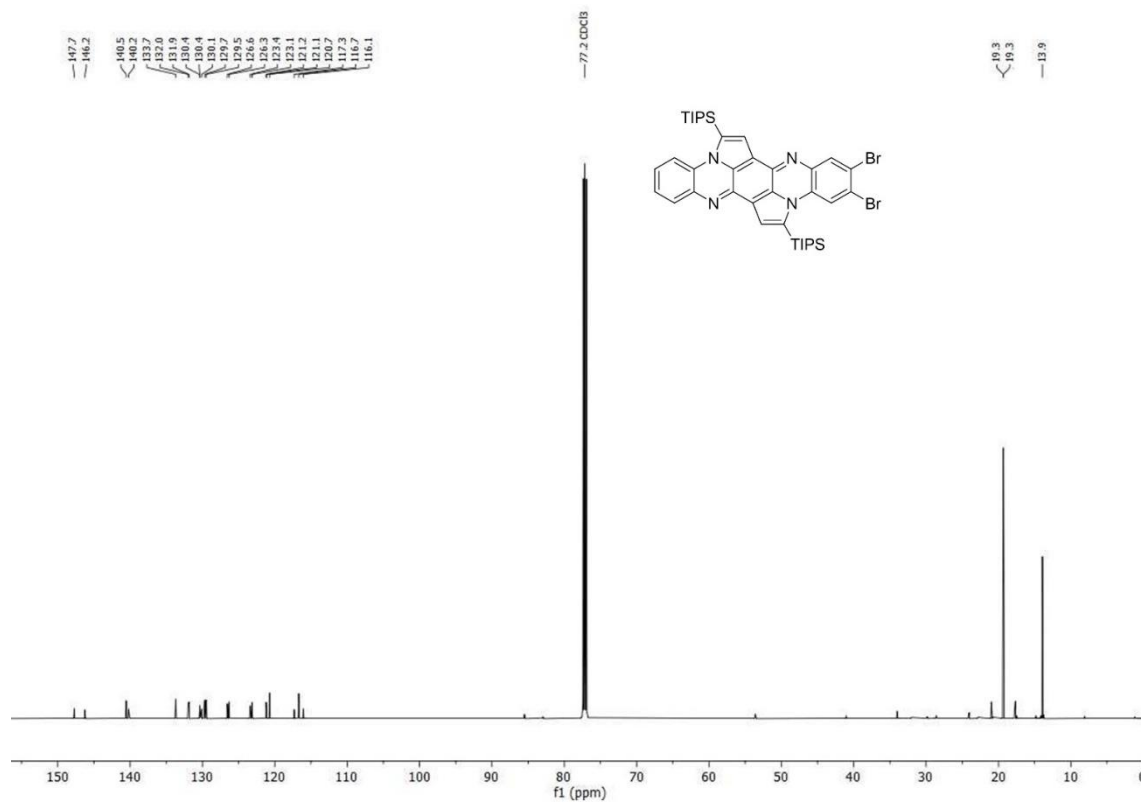Figure S2.  $^{13}\text{C}\{^1\text{H}\}$  NMR spectrum (151 MHz,  $\text{CDCl}_3$ ) of **3a**.

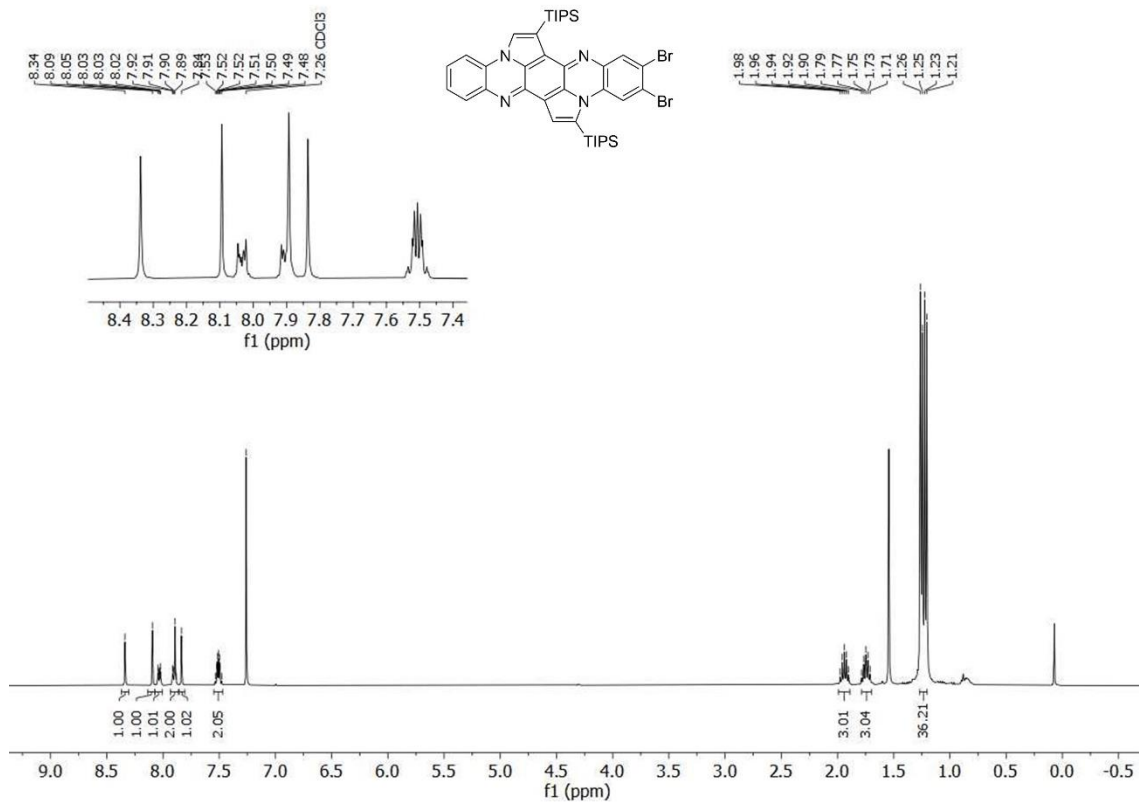

**Figure S3.**  $^1\text{H}$  NMR spectrum (400 MHz,  $\text{CDCl}_3$ ) of **3b**.

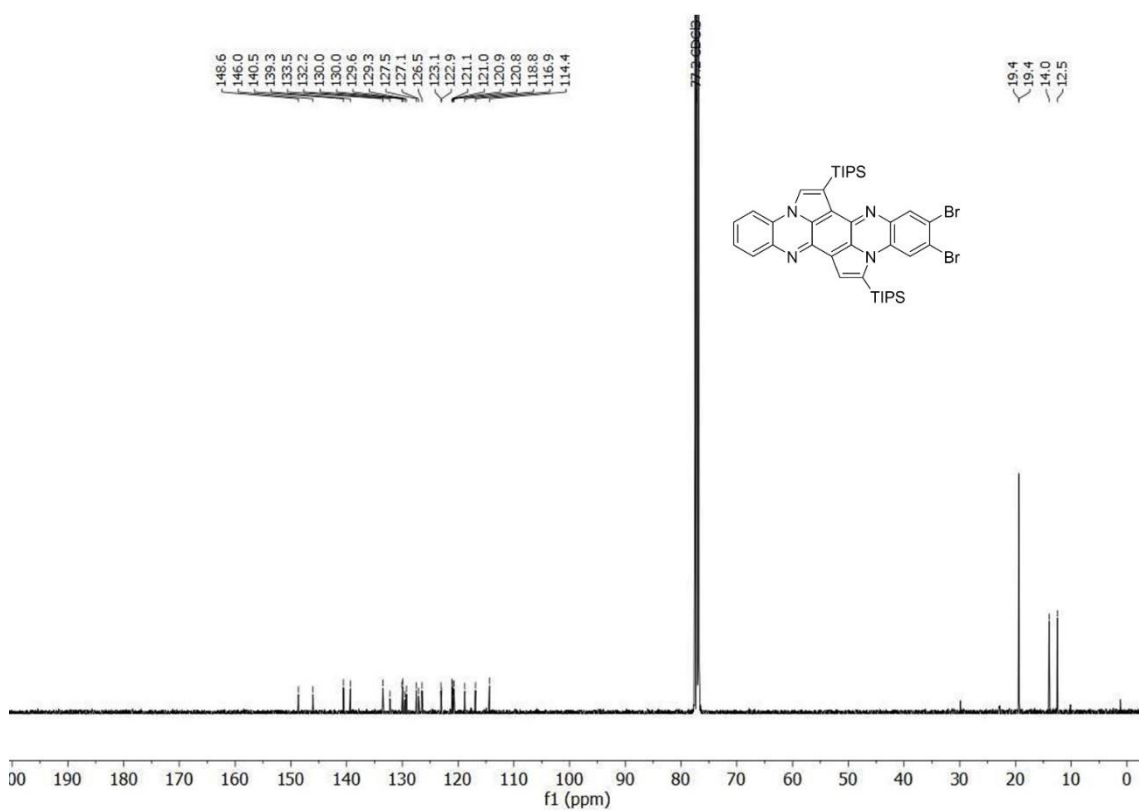

**Figure S4.**  $^{13}\text{C}\{^1\text{H}\}$  NMR spectrum (101 MHz,  $\text{CDCl}_3$ ) of **3b**.

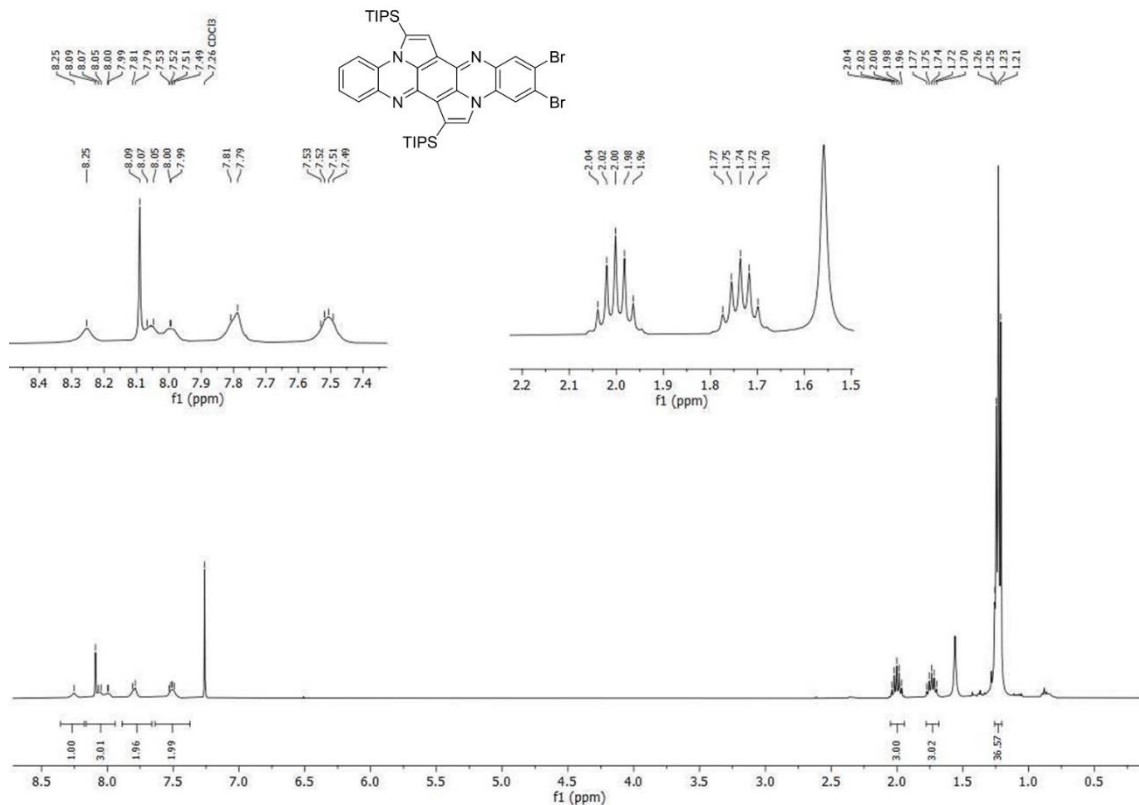

Figure S5. <sup>1</sup>H NMR spectrum (400 MHz, CDCl<sub>3</sub>) of **3c**.

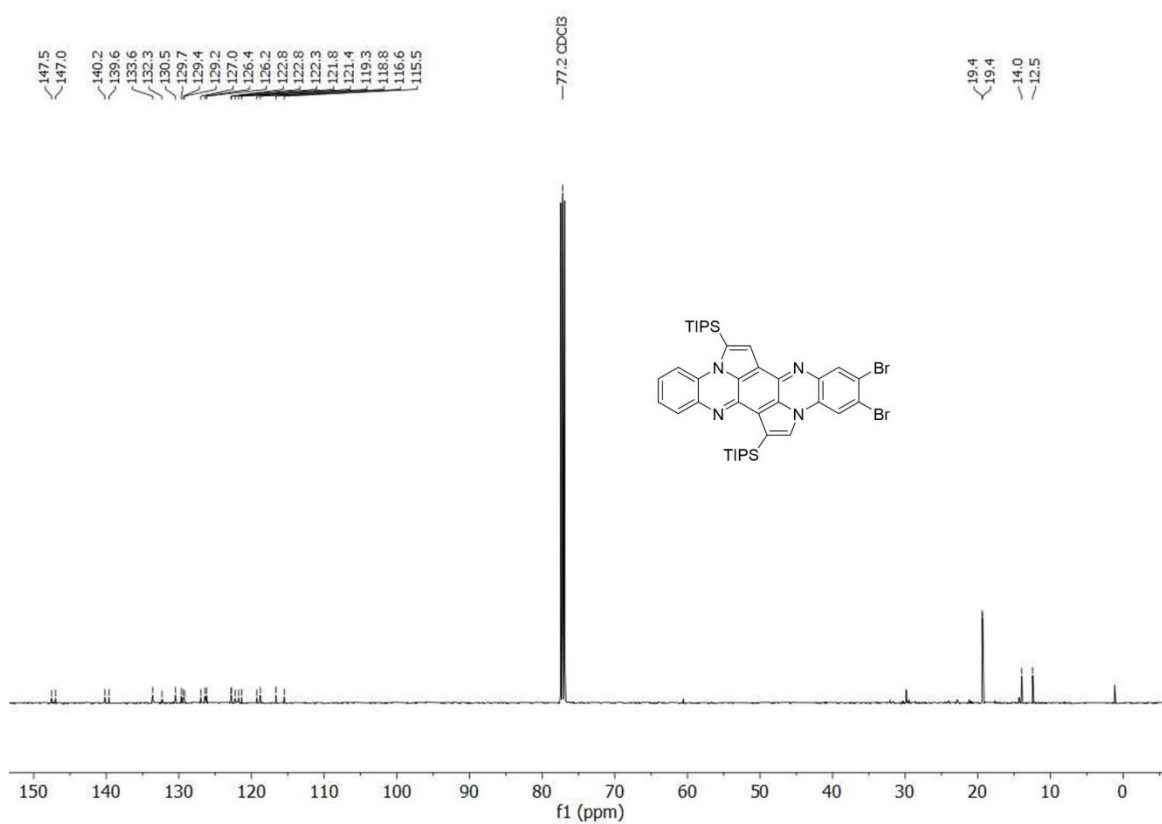

Figure S6. <sup>13</sup>C NMR spectrum (400 MHz, CDCl<sub>3</sub>) of **3c**.

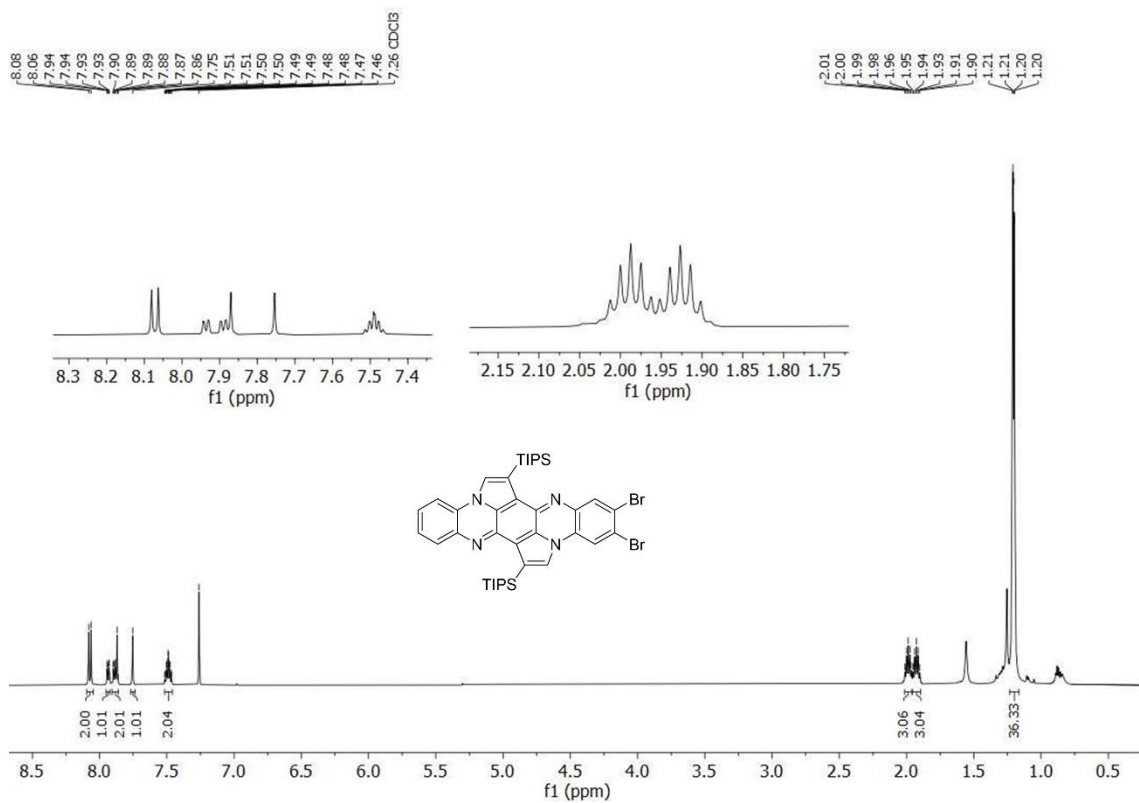

Figure S7.  $^{13}\text{C}\{^1\text{H}\}$  spectrum (126 MHz,  $\text{CDCl}_3$ ) of **3d**.

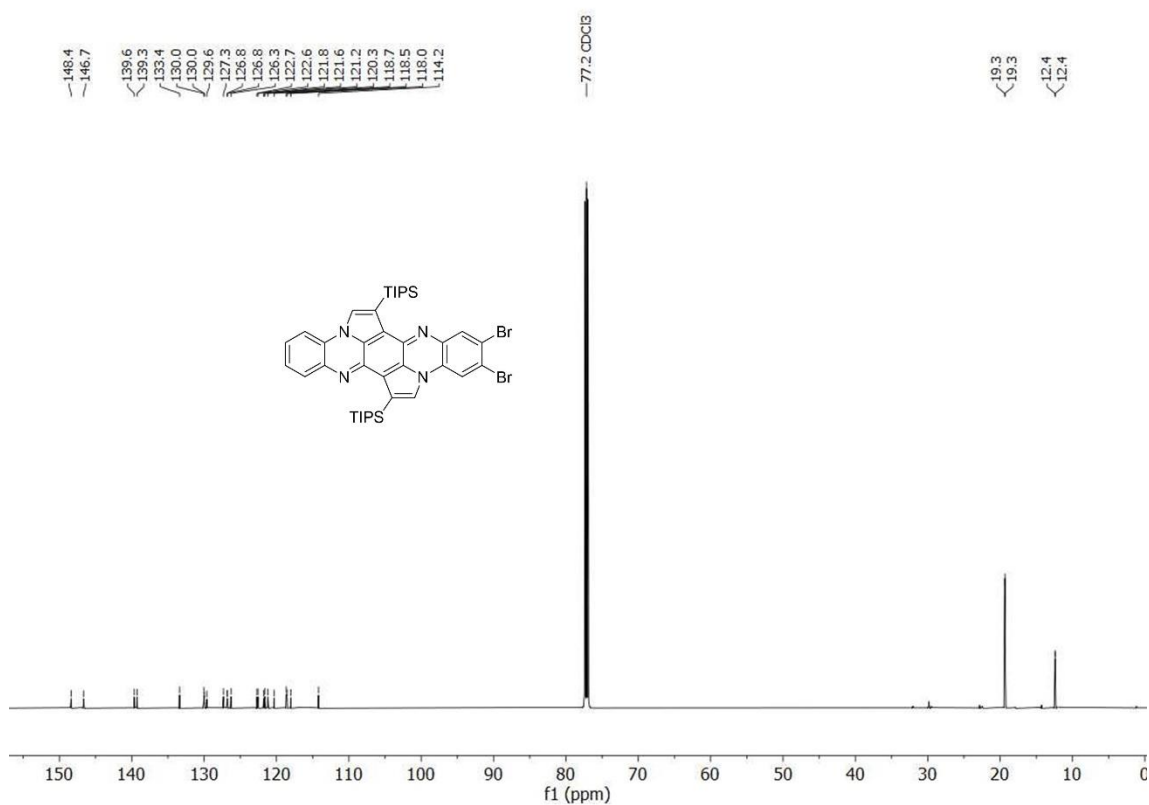

Figure S8.  $^{13}\text{C}\{^1\text{H}\}$  NMR spectrum (151 MHz,  $\text{CDCl}_3$ ) of **3d**.

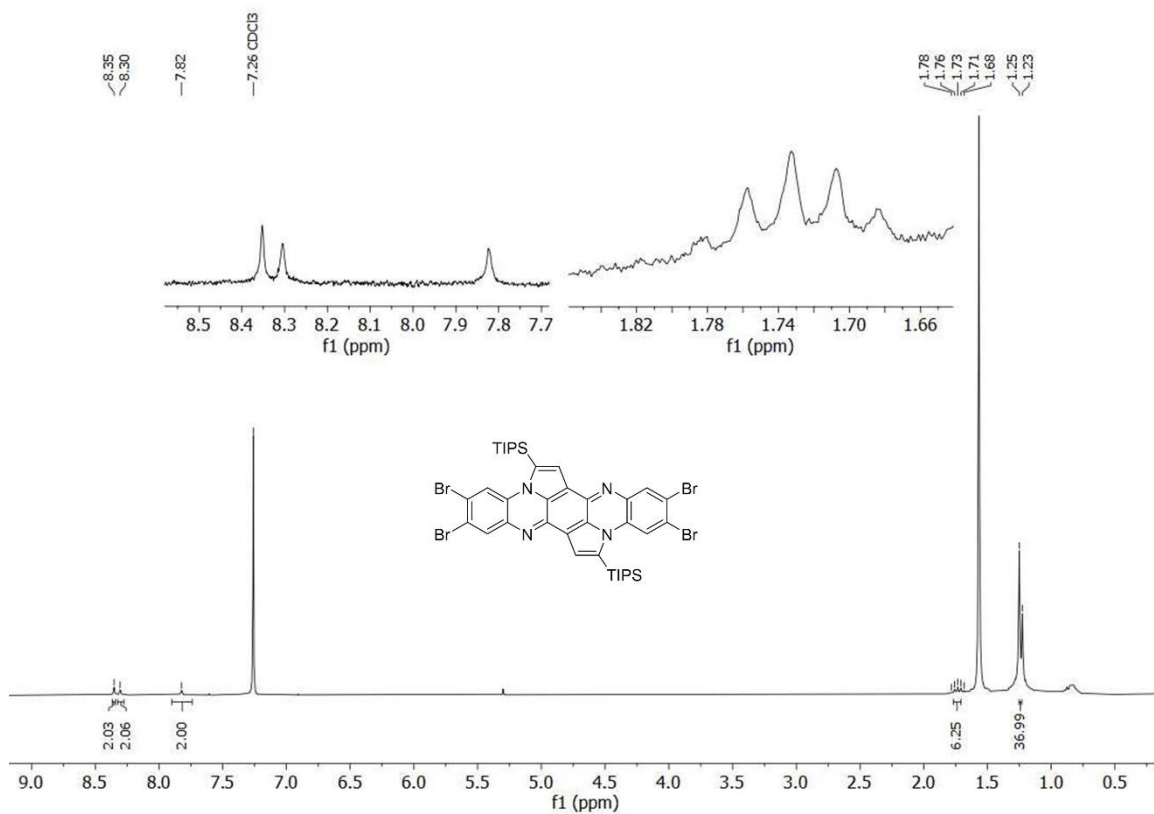

Figure S9.  $^1\text{H-NMR}$  spectrum (300 MHz,  $\text{CDCl}_3$ ) of **4a**.

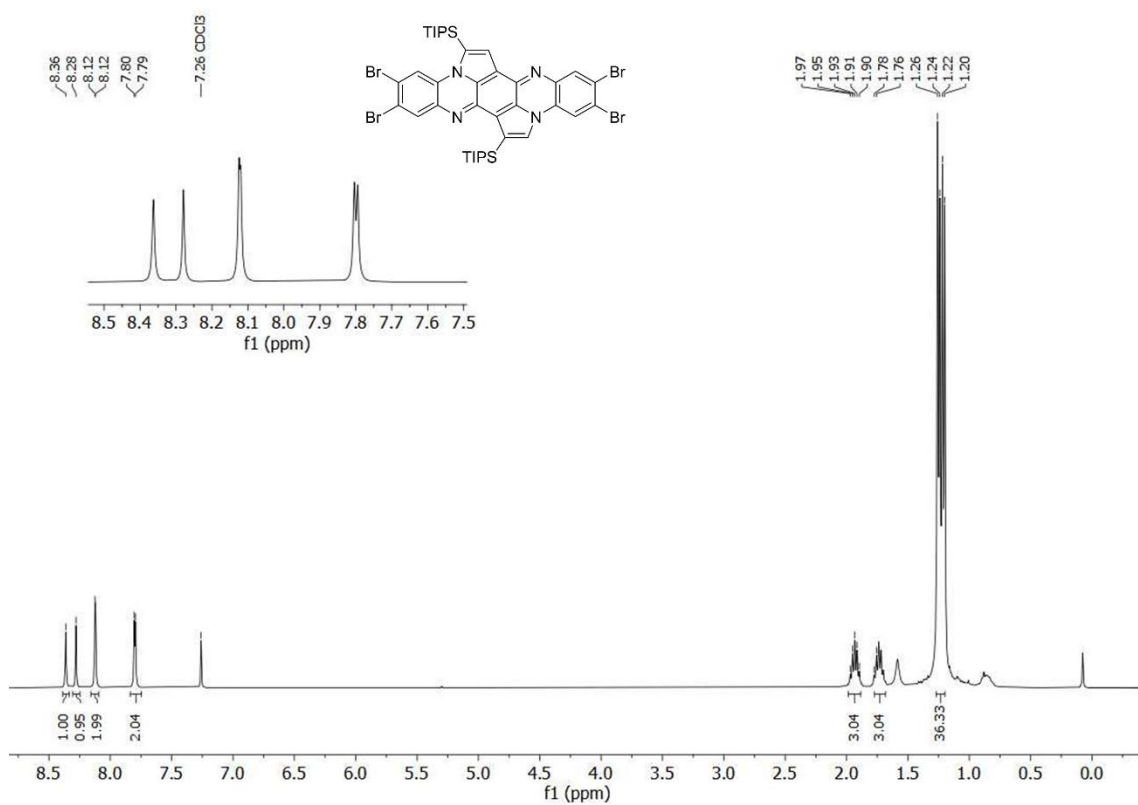

Figure S10.  $^{13}\text{C}\{^1\text{H}\}$  NMR spectrum (400 MHz,  $\text{CDCl}_3$ ) of **4b**.



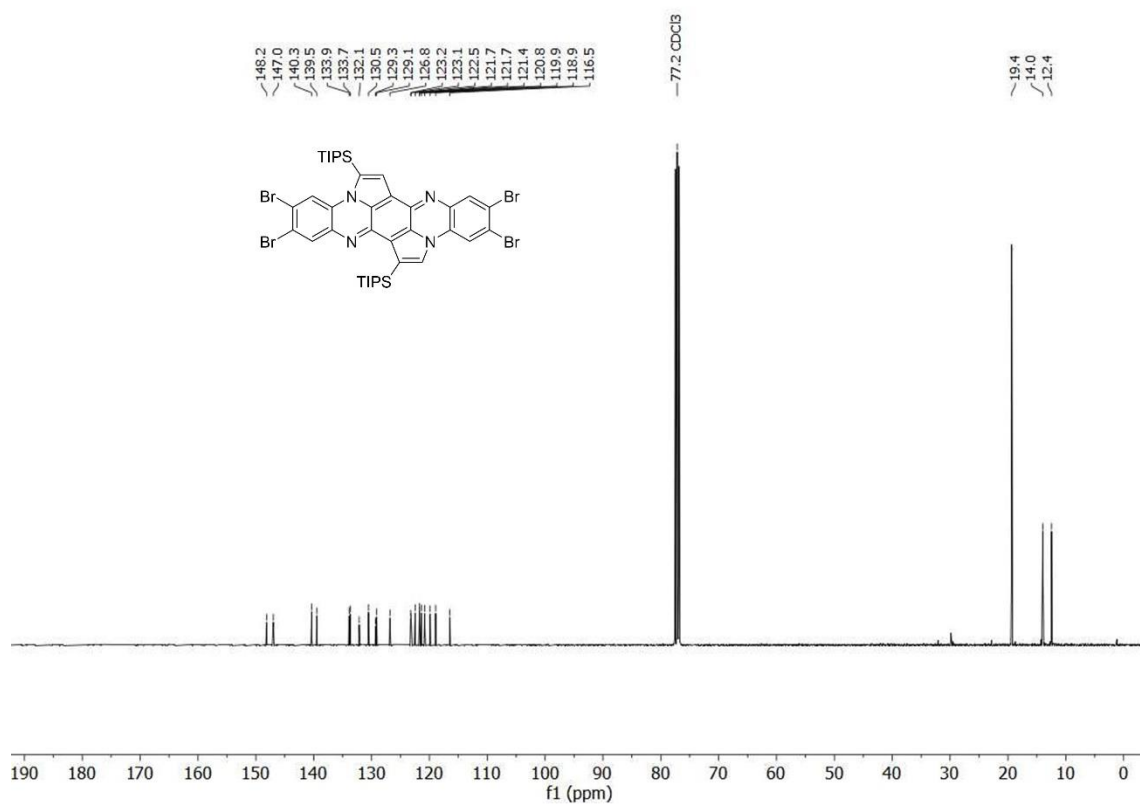

Figure S11.  $^{13}\text{C}\{^1\text{H}\}$  NMR spectrum (101 MHz,  $\text{CDCl}_3$ ) of **4b**.

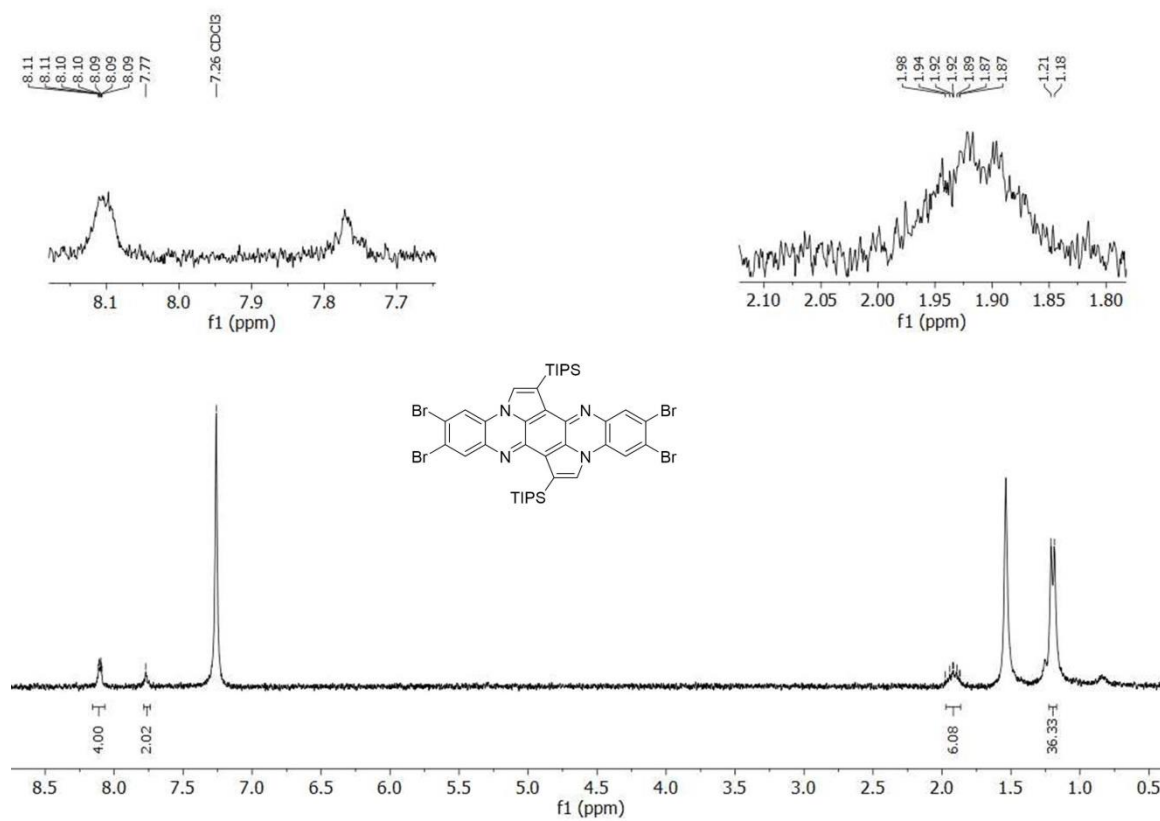

Figure S12.  $^1\text{H}$  NMR spectrum (300 MHz,  $\text{CDCl}_3$ ) of **4c**.

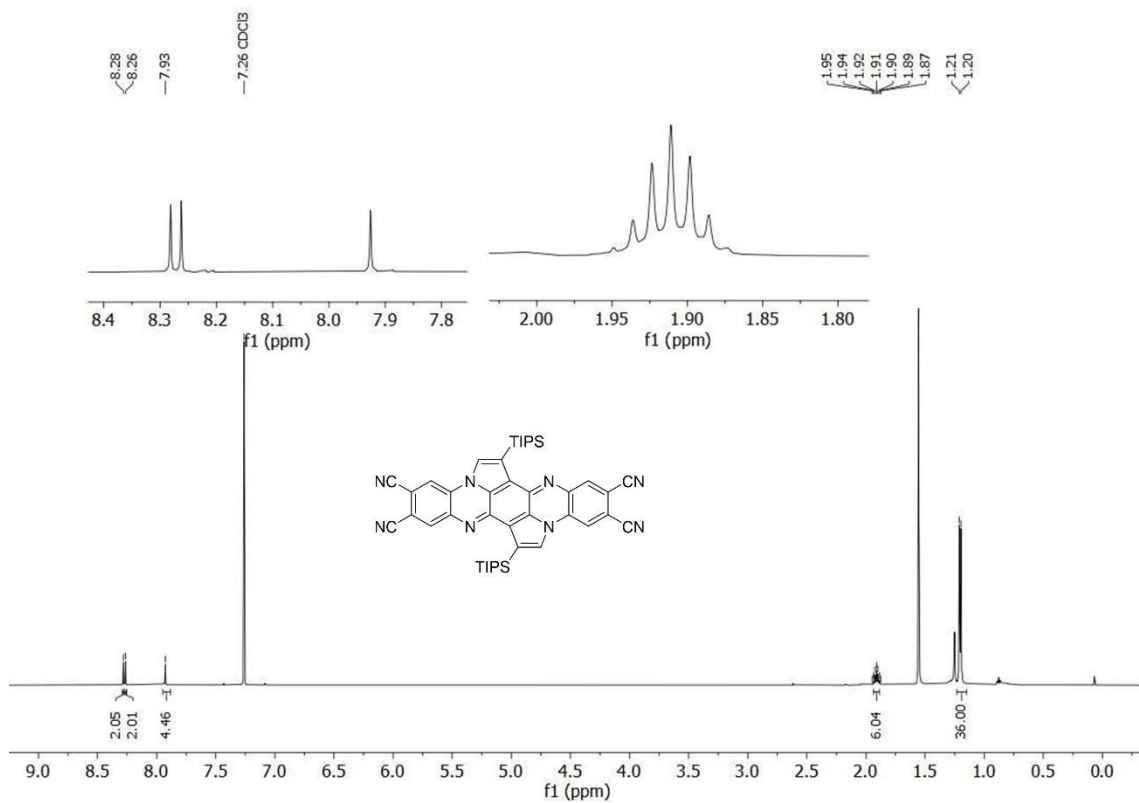

Figure S13. <sup>1</sup>H NMR spectrum (600 MHz, CDCl<sub>3</sub>) of **5c**.

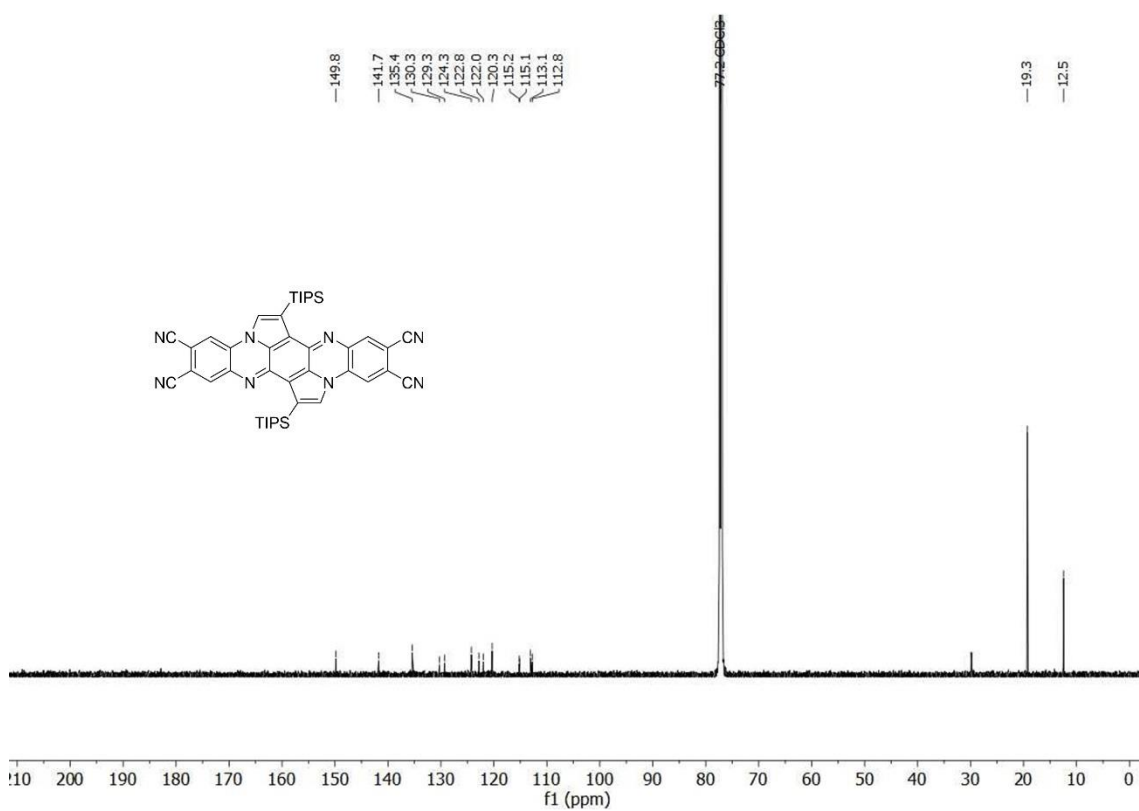

Figure S14. <sup>13</sup>C{<sup>1</sup>H} NMR spectrum (151 MHz, CDCl<sub>3</sub>, 323 K) of **5c**.

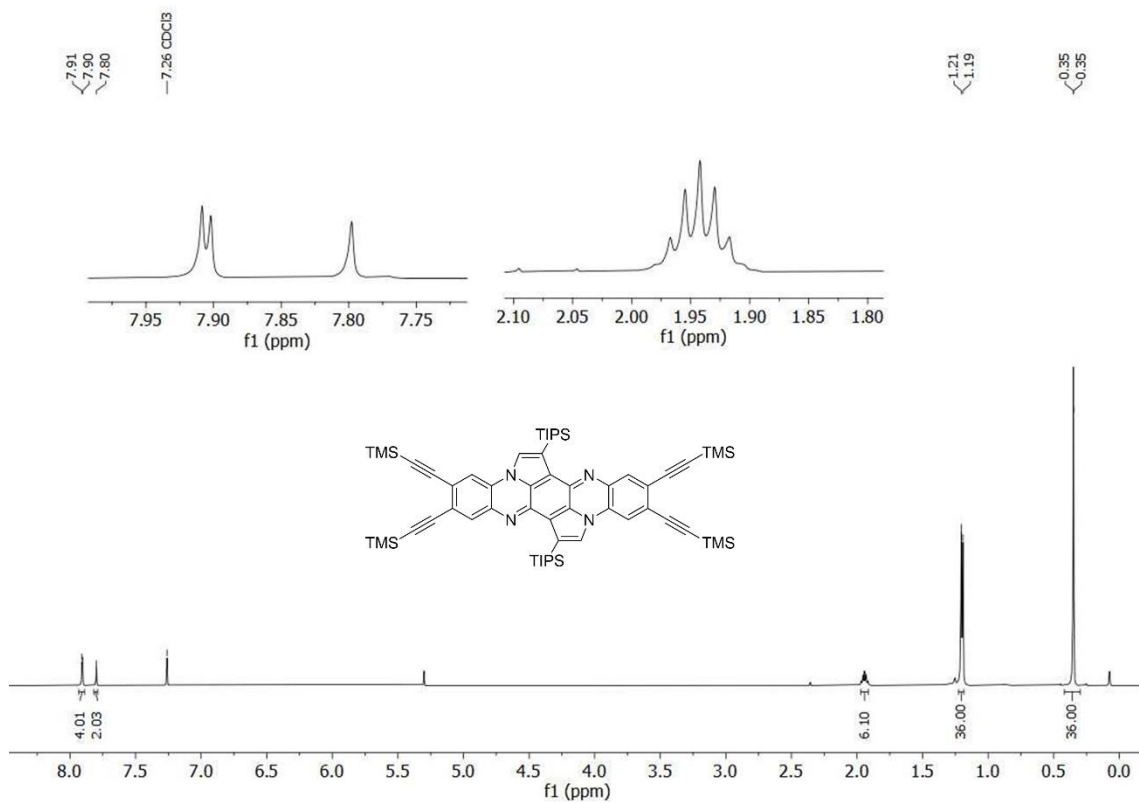

Figure S15. <sup>1</sup>H NMR spectrum (600 MHz, CDCl<sub>3</sub>) of **6c**.

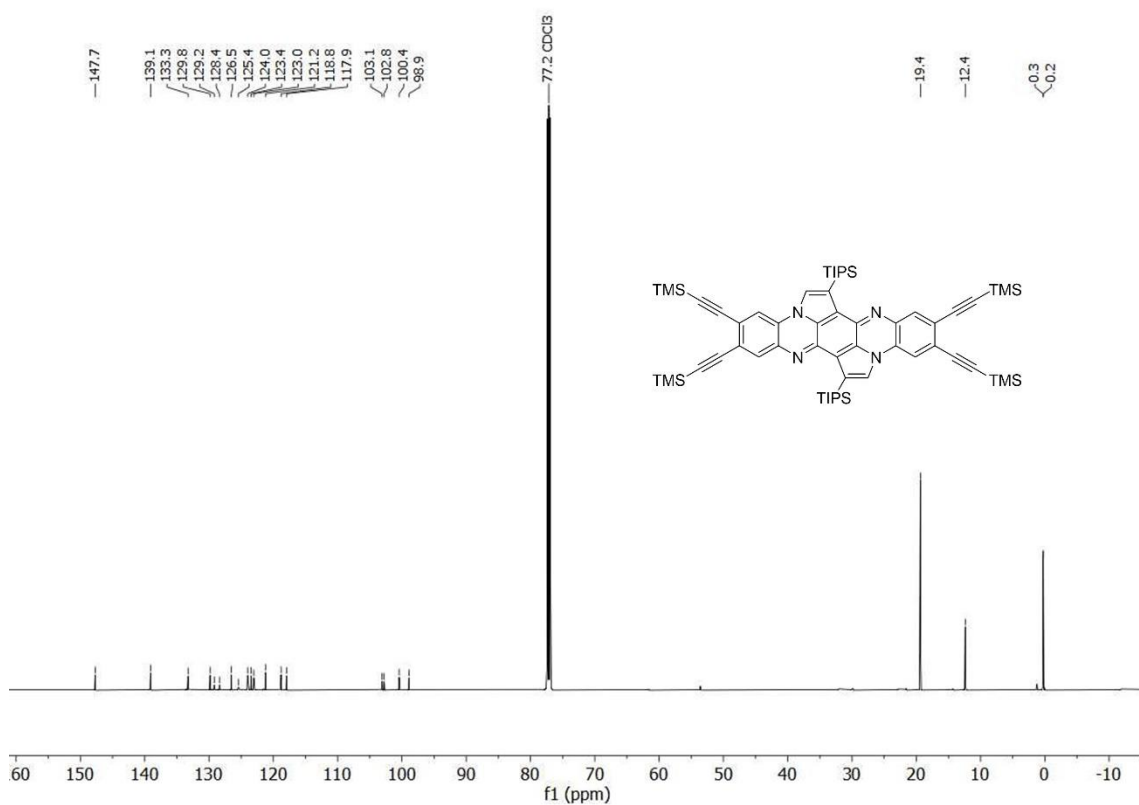

Figure S16. <sup>13</sup>C{<sup>1</sup>H} NMR spectrum (151 MHz, CDCl<sub>3</sub>) of **6c**.

### 3 UV-Vis Spectra

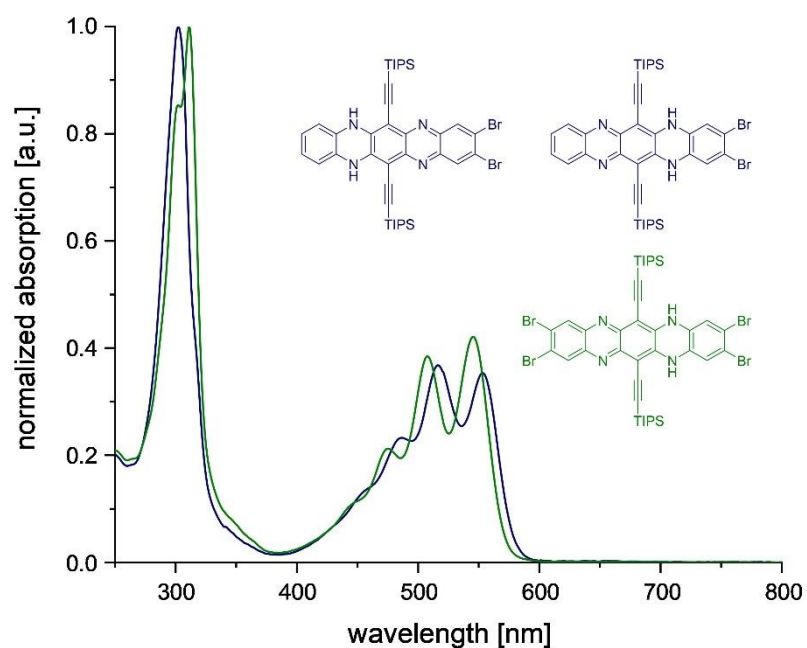

Figure S17. Normalized absorption spectra of 1 and 2 in DCM.

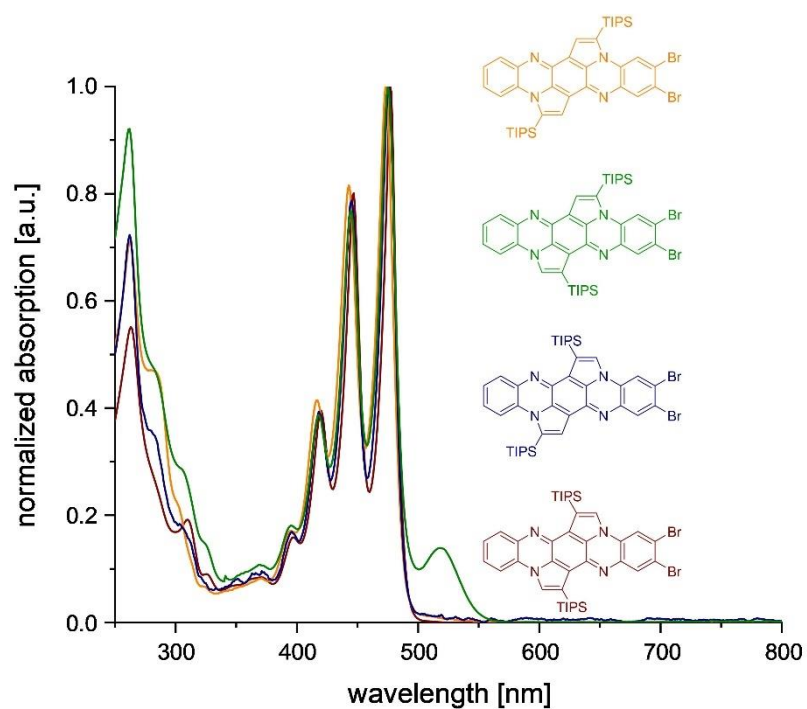

Figure S18. Normalized absorption spectra of 3a, 3b, 3c, and 3d in DCM.

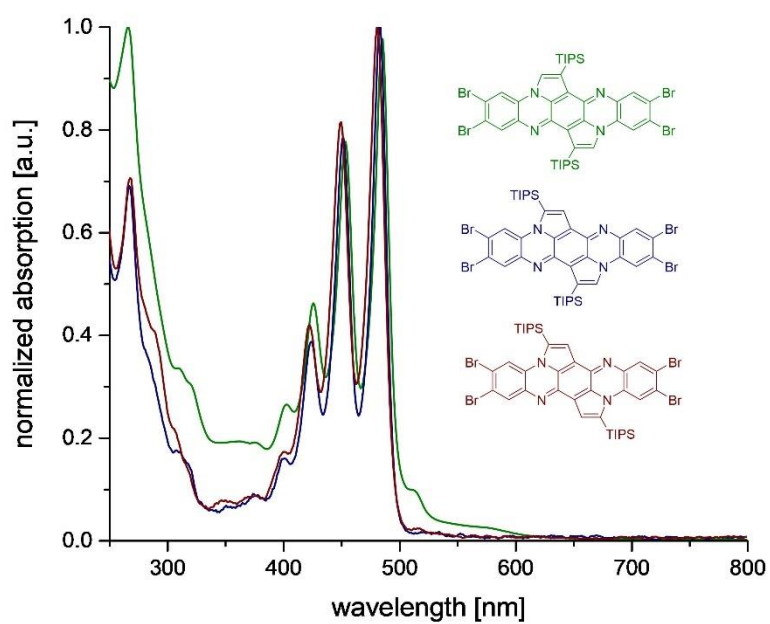

Figure S19. Normalized absorption spectra of **4a**, **4b**, and **4c** in DCM.

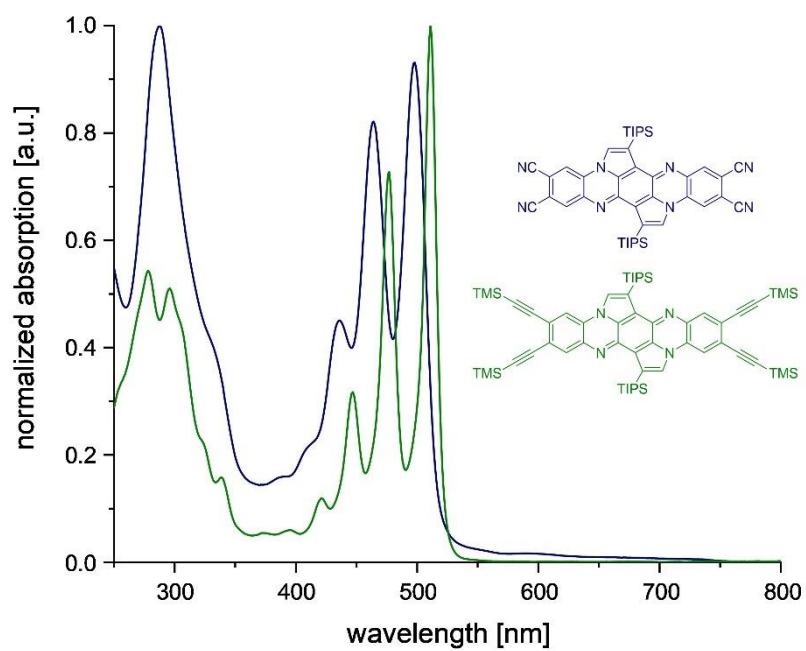

Figure S20. Normalized absorption spectra of **5c** and **6c** in DCM.

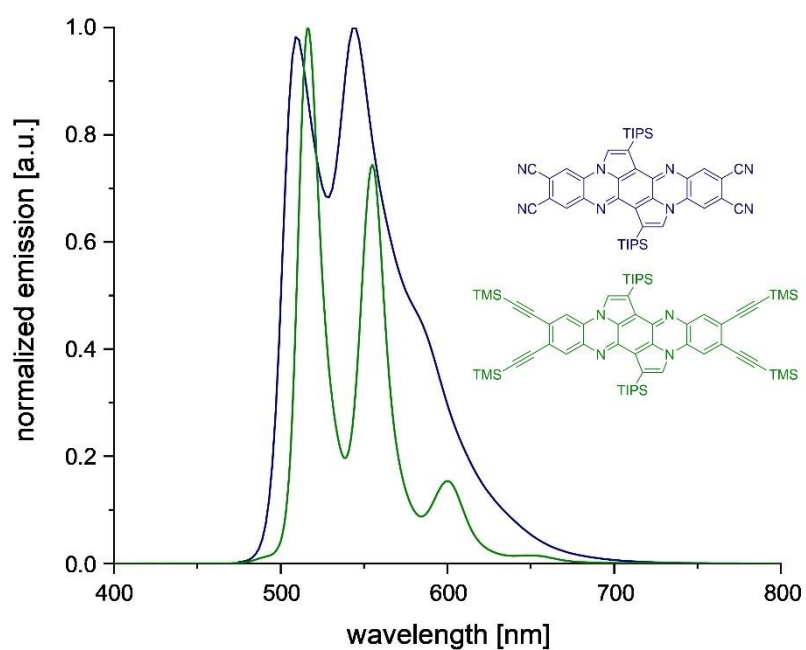

Figure S21. Normalized emission spectra of 1 and 2 in DCM.

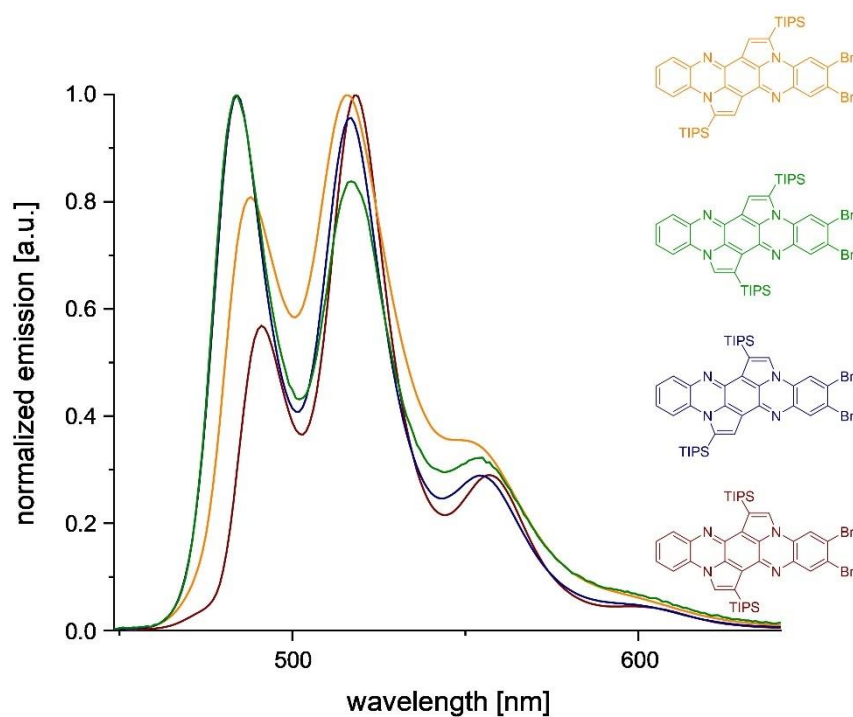

Figure S22. Normalized emission spectra of 3a, 3b, 3c, and 3d in DCM.

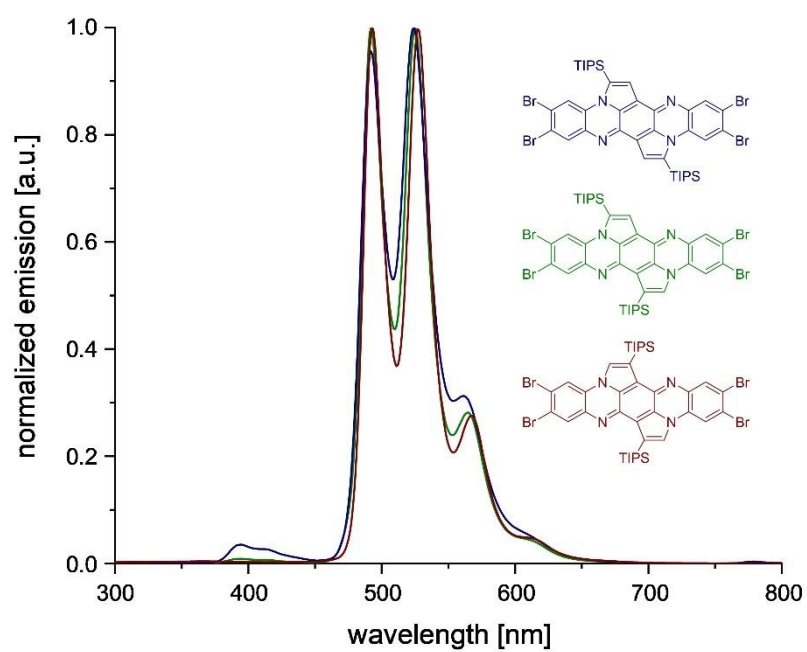

Figure S23. Normalized emission spectra of **4a**, **4b**, and **4c** in DCM.

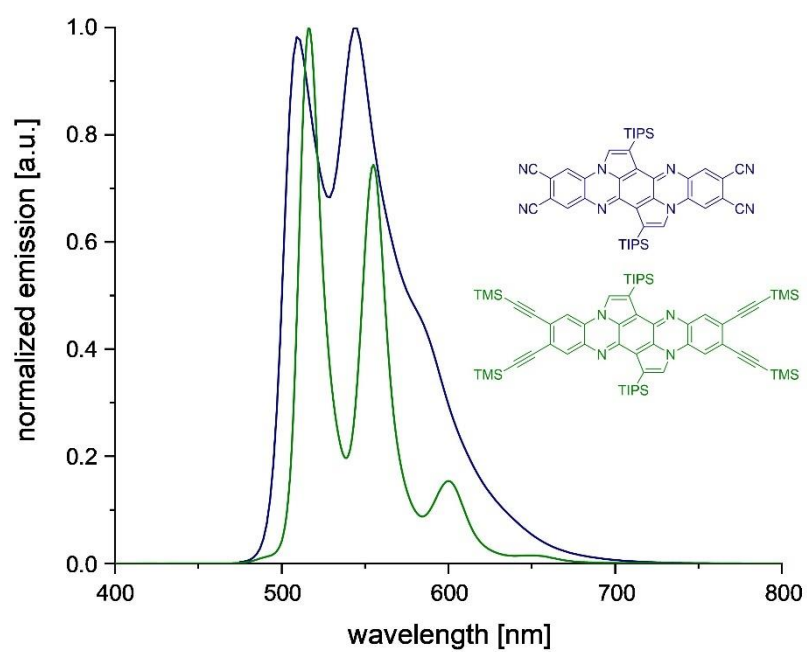

Figure S24. Normalized emission spectra of **5c** and **6c** in DCM.

## 4 IR Spectra

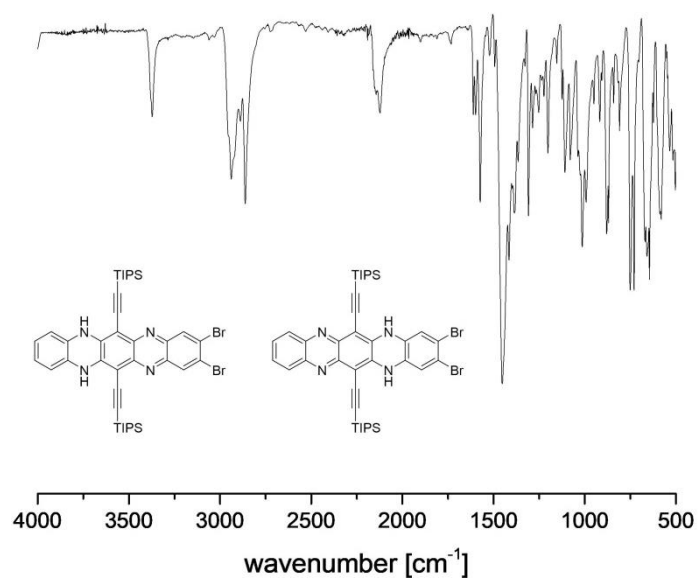Figure S25. ATR-IR spectra of **1** (mixture of tautomers).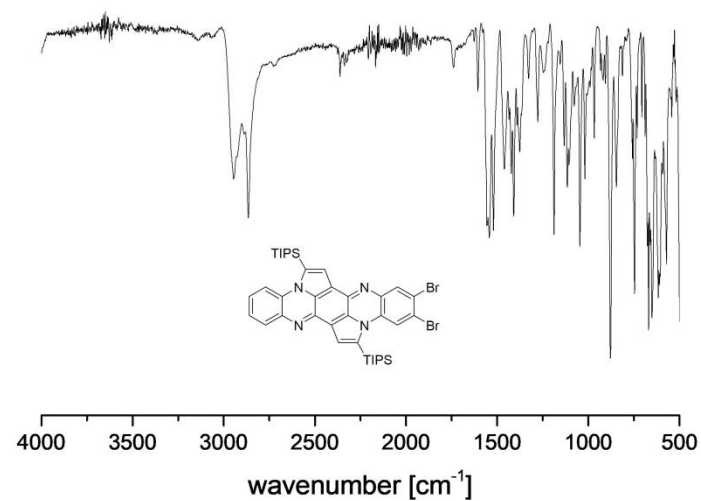Figure S26. ATR-IR spectra of **3a**.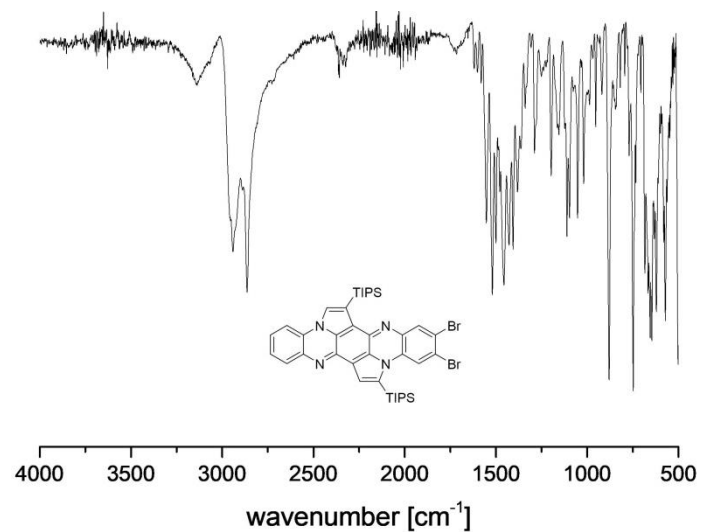Figure S27. ATR-IR spectra of **3b**.



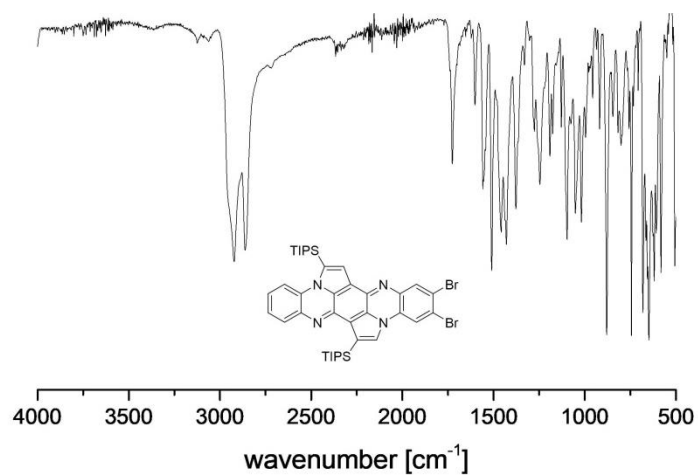

Figure S28. ATR-IR spectra of 3c.

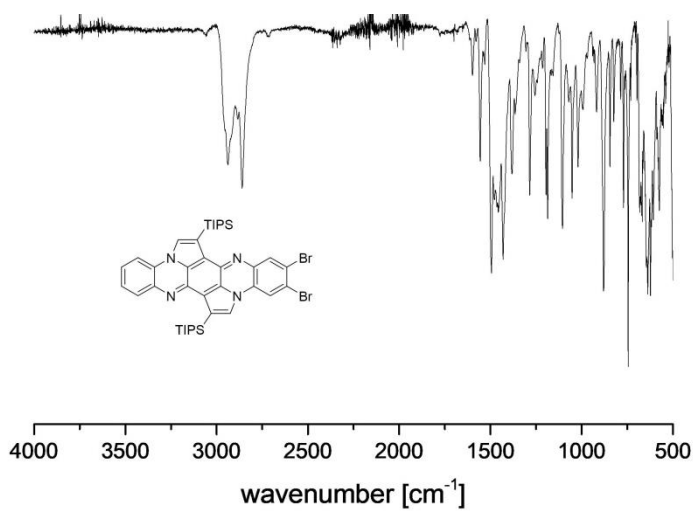

Figure S29. ATR-IR spectra of 3d.

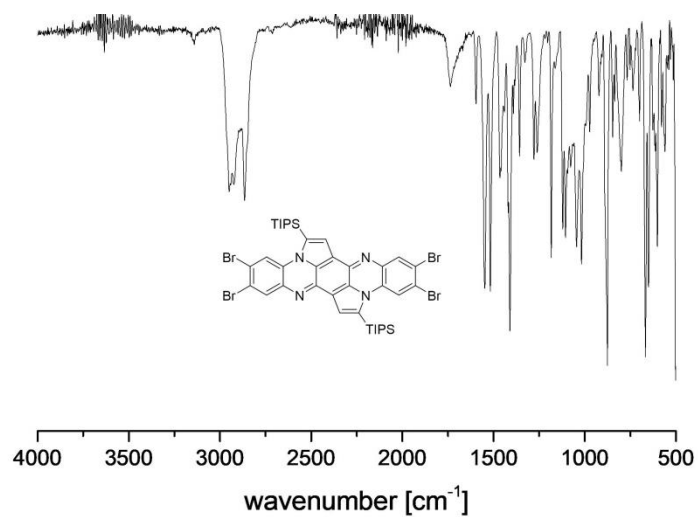

Figure S30. ATR-IR spectra of 4a.

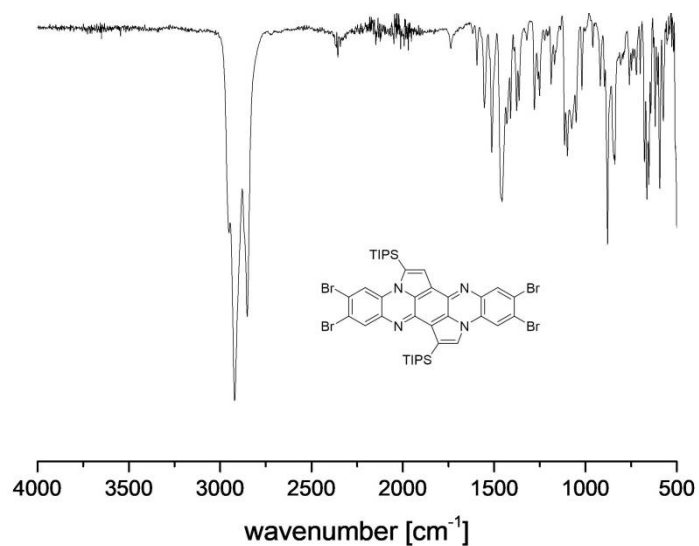

Figure S31. ATR-IR spectra of 4b.

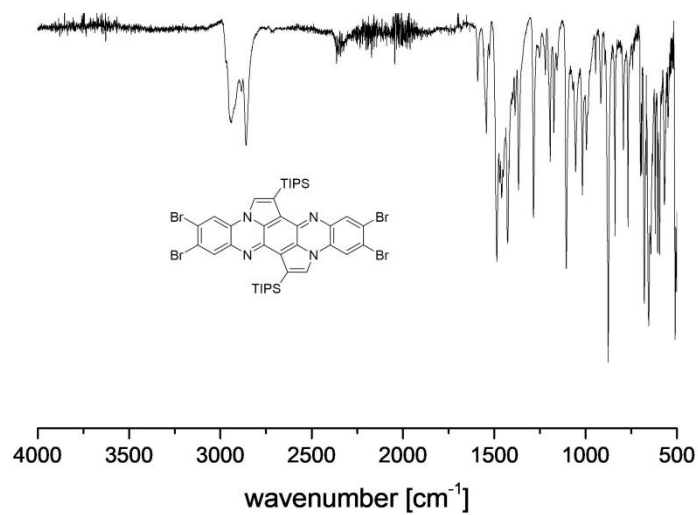

Figure S32. ATR-IR spectra of 4c.

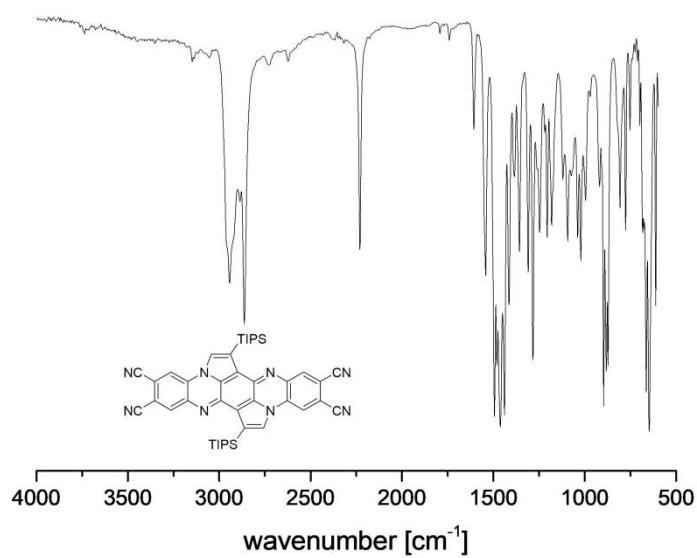

Figure S33. ATR-IR spectra of 5c.

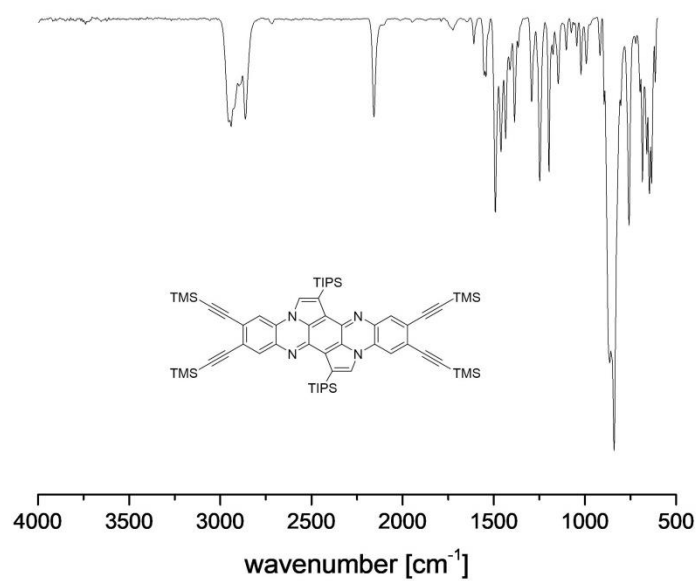

Figure S34. ATR-IR spectra of **6c**.

## 5 Crystallographic Data

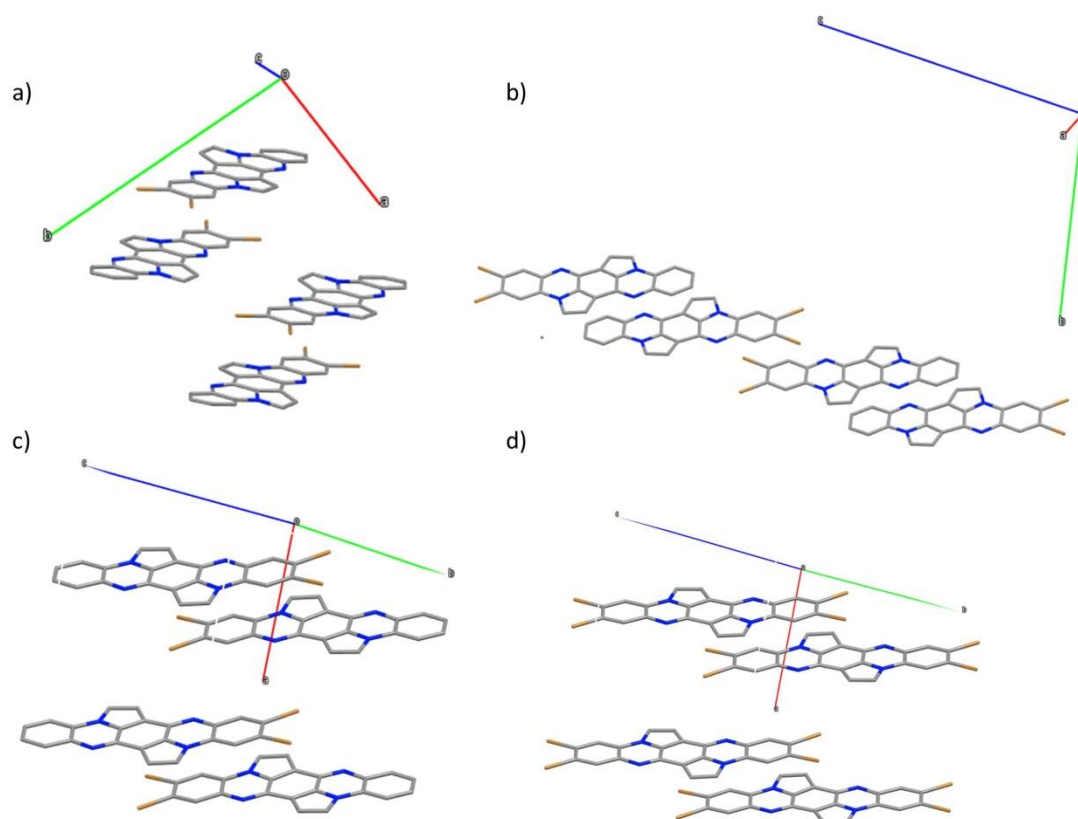

**Figure S35.** Solid state packing of a) **3a**, b) **3b**, c) **3c** and d) **4b**. Solvent molecules and TIPS-groups were removed for clarity.

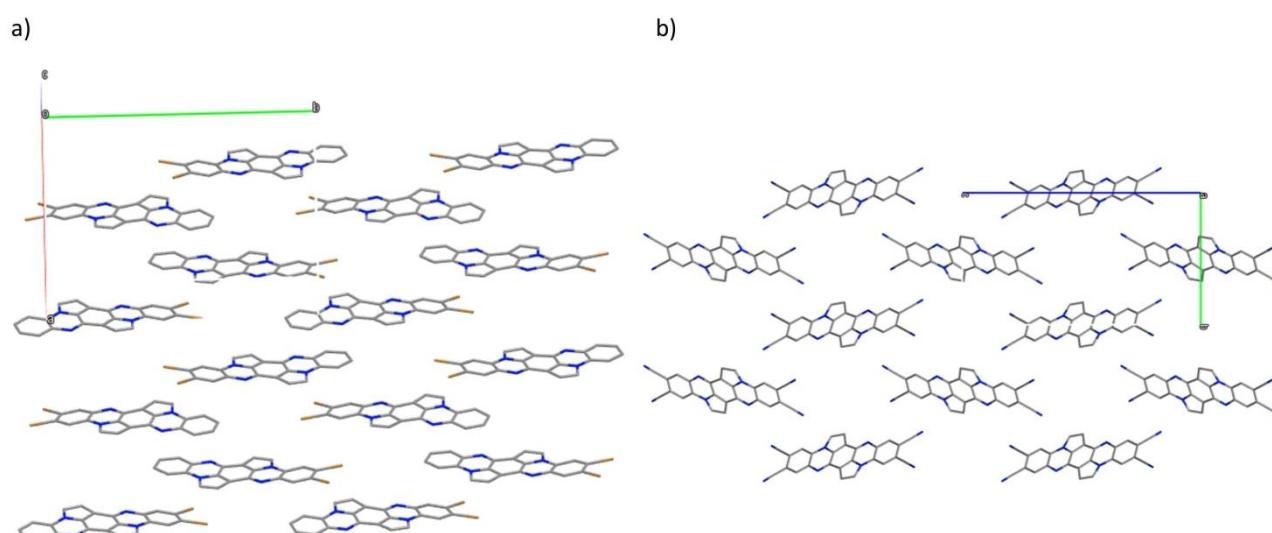

**Figure S36.** Solid state packing of a) **3d** and b) **5c**. Solvent molecules and TIPS-groups were removed for clarity.

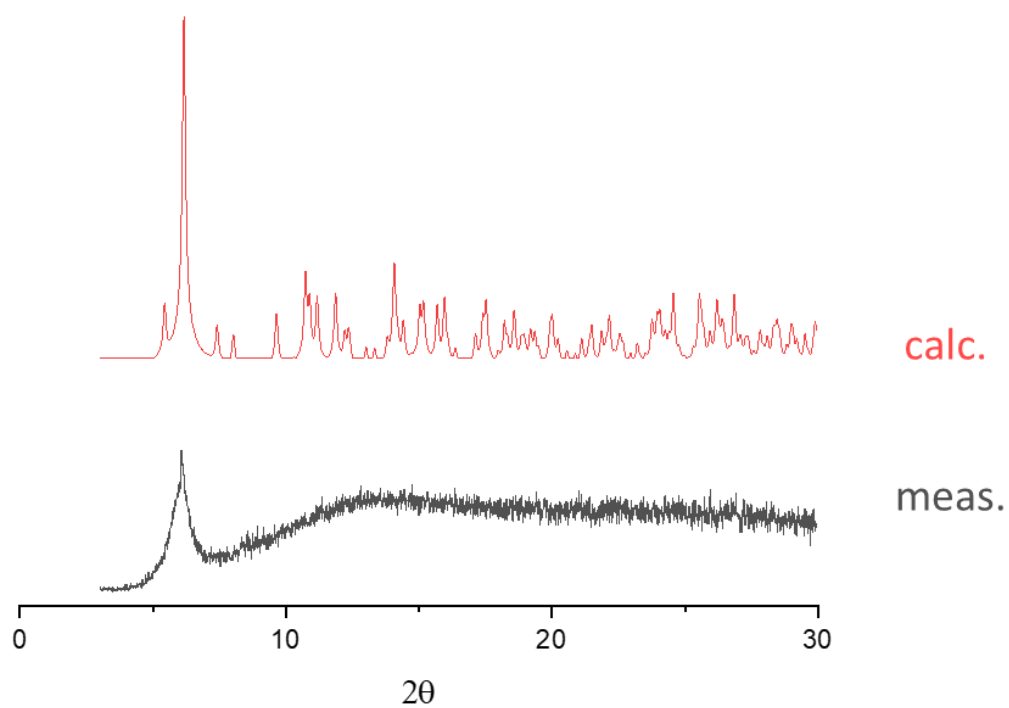

**Figure S37.** Calculated powder diffractogram and measured XRD film pattern of **3d**. Measured reflex at  $2\theta = 6.07^\circ$ .

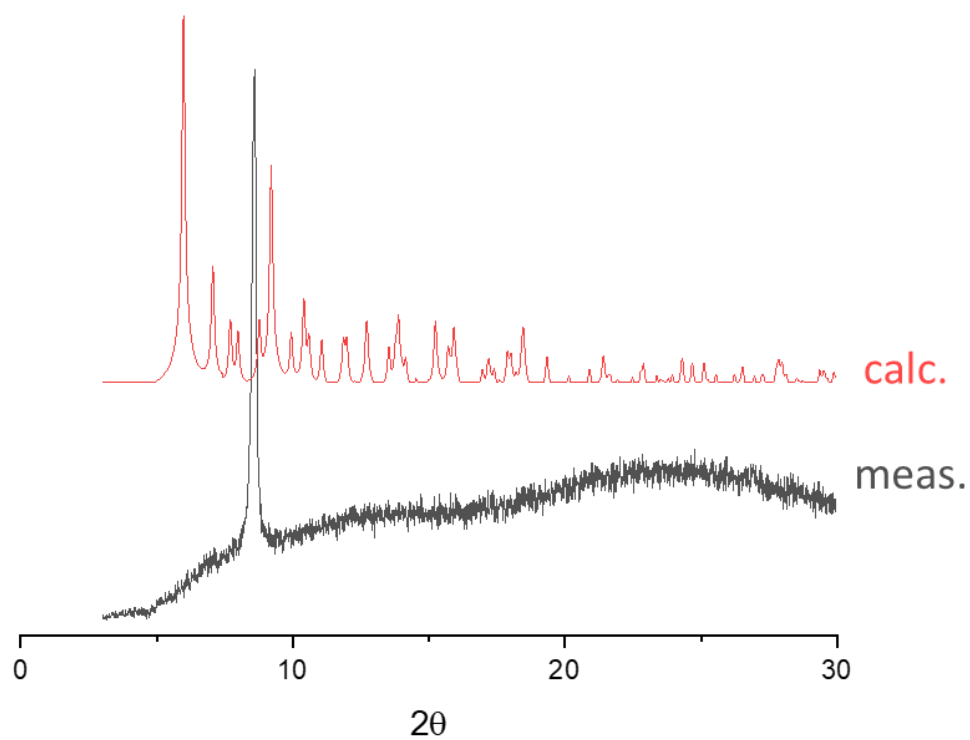

**Figure S38.** Calculated powder diffractogram and measured XRD film pattern of **5c**. Measured reflex at  $2\theta = 8.59^\circ$ .

**Table S1.** Crystal structure, crystal data and structure refinement of **3a** (2178793).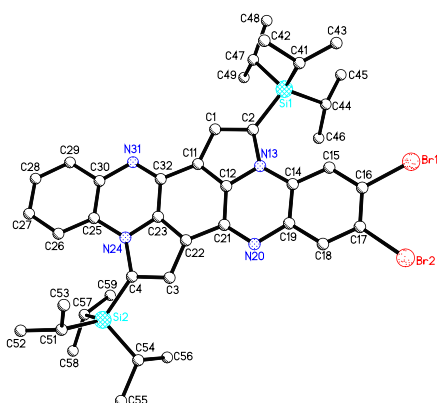

|                                   |                                                                                                 |                           |
|-----------------------------------|-------------------------------------------------------------------------------------------------|---------------------------|
| Identification code               | hek7                                                                                            |                           |
| Empirical formula                 | C <sub>42</sub> H <sub>55</sub> Br <sub>2</sub> Cl <sub>3</sub> N <sub>4</sub> OSi <sub>2</sub> |                           |
| Formula weight                    | 954.25                                                                                          |                           |
| Temperature                       | 200(2) K                                                                                        |                           |
| Wavelength                        | 1.54178 Å                                                                                       |                           |
| Crystal system                    | triclinic                                                                                       |                           |
| Space group                       | P $\bar{1}$                                                                                     |                           |
| Z                                 | 2                                                                                               |                           |
| Unit cell dimensions              | a = 8.8455(5) Å                                                                                 | $\alpha$ = 70.467(5) deg. |
|                                   | b = 16.0891(11) Å                                                                               | $\beta$ = 81.306(5) deg.  |
|                                   | c = 16.7125(9) Å                                                                                | $\gamma$ = 89.407(5) deg. |
| Volume                            | 2213.8(2) Å <sup>3</sup>                                                                        |                           |
| Density (calculated)              | 1.43 g/cm <sup>3</sup>                                                                          |                           |
| Absorption coefficient            | 4.79 mm <sup>-1</sup>                                                                           |                           |
| Crystal shape                     | plate                                                                                           |                           |
| Crystal size                      | 0.140 x 0.030 x 0.018 mm <sup>3</sup>                                                           |                           |
| Crystal colour                    | yellow                                                                                          |                           |
| Theta range for data collection   | 2.8 to 62.1 deg.                                                                                |                           |
| Index ranges                      | -9 ≤ h ≤ 10, -17 ≤ k ≤ 18, -10 ≤ l ≤ 18                                                         |                           |
| Reflections collected             | 16806                                                                                           |                           |
| Independent reflections           | 6611 (R(int) = 0.0717)                                                                          |                           |
| Observed reflections              | 3518 (I > 2σ(I))                                                                                |                           |
| Absorption correction             | Semi-empirical from equivalents                                                                 |                           |
| Max. and min. transmission        | 2.15 and 0.40                                                                                   |                           |
| Refinement method                 | Full-matrix least-squares on F <sup>2</sup>                                                     |                           |
| Data/restraints/parameters        | 6611 / 434 / 510                                                                                |                           |
| Goodness-of-fit on F <sup>2</sup> | 0.99                                                                                            |                           |
| Final R indices (I > 2σ(I))       | R1 = 0.069, wR2 = 0.169                                                                         |                           |
| Largest diff. peak and hole       | 0.58 and -0.95 eÅ <sup>-3</sup>                                                                 |                           |

**Table S2.** Crystal structure, crystal data and structure refinement of **3b** (2178794).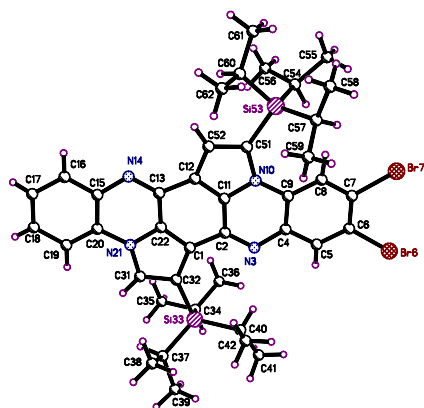

|                                   |                                                                                |                     |
|-----------------------------------|--------------------------------------------------------------------------------|---------------------|
| Identification code               | hek8                                                                           |                     |
| Empirical formula                 | C <sub>40</sub> H <sub>50</sub> Br <sub>2</sub> N <sub>4</sub> Si <sub>2</sub> |                     |
| Formula weight                    | 802.84                                                                         |                     |
| Temperature                       | 200(2) K                                                                       |                     |
| Wavelength                        | 0.71073 Å                                                                      |                     |
| Crystal system                    | Triclinic                                                                      |                     |
| Space group                       | P-1                                                                            |                     |
| Z                                 | 2                                                                              |                     |
| Unit cell dimensions              | a = 8.3078(5) Å                                                                | α = 100.677(1) deg. |
|                                   | b = 13.4793(8) Å                                                               | β = 91.144(1) deg.  |
|                                   | c = 17.6145(10) Å                                                              | γ = 90.074(1) deg.  |
| Volume                            | 1938.0(2) Å <sup>3</sup>                                                       |                     |
| Density (calculated)              | 1.38 g/cm <sup>3</sup>                                                         |                     |
| Absorption coefficient            | 2.19 mm <sup>-1</sup>                                                          |                     |
| Crystal shape                     | plank                                                                          |                     |
| Crystal size                      | 0.170 x 0.054 x 0.040 mm <sup>3</sup>                                          |                     |
| Crystal colour                    | brown                                                                          |                     |
| Theta range for data collection   | 1.2 to 29.9 deg.                                                               |                     |
| Index ranges                      | -11 ≤ h ≤ 11, -18 ≤ k ≤ 18, -24 ≤ l ≤ 23                                       |                     |
| Reflections collected             | 39798                                                                          |                     |
| Independent reflections           | 10362 (R(int) = 0.0341)                                                        |                     |
| Observed reflections              | 7920 (I > 2σ(I))                                                               |                     |
| Absorption correction             | Semi-empirical from equivalents                                                |                     |
| Max. and min. transmission        | 0.75 and 0.66                                                                  |                     |
| Refinement method                 | Full-matrix least-squares on F <sup>2</sup>                                    |                     |
| Data/restraints/parameters        | 10362 / 0 / 493                                                                |                     |
| Goodness-of-fit on F <sup>2</sup> | 1.03                                                                           |                     |
| Final R indices (I > 2σ(I))       | R1 = 0.037, wR2 = 0.088                                                        |                     |
| Largest diff. peak and hole       | 0.82 and -0.55 eÅ <sup>-3</sup>                                                |                     |

**Table S3.** Crystal structure, crystal data and structure refinement of **3c** (2178795).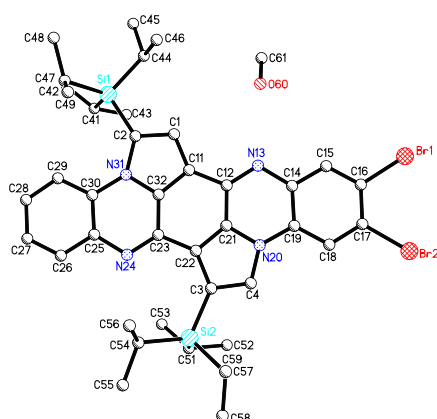

|                                   |                                                                                                  |                            |
|-----------------------------------|--------------------------------------------------------------------------------------------------|----------------------------|
| Identification code               | hek9                                                                                             |                            |
| Empirical formula                 | C <sub>40</sub> H <sub>50</sub> Br <sub>2</sub> N <sub>4</sub> O <sub>0.50</sub> Si <sub>2</sub> |                            |
| Formula weight                    | 810.84                                                                                           |                            |
| Temperature                       | 200(2) K                                                                                         |                            |
| Wavelength                        | 0.71073 Å                                                                                        |                            |
| Crystal system                    | triclinic                                                                                        |                            |
| Space group                       | P $\bar{1}$                                                                                      |                            |
| Z                                 | 2                                                                                                |                            |
| Unit cell dimensions              | a = 8.0823(4) Å                                                                                  | $\alpha$ = 70.1331(9) deg. |
|                                   | b = 14.8030(8) Å                                                                                 | $\beta$ = 88.3939(11) deg. |
|                                   | c = 18.1892(10) Å                                                                                | $\gamma$ = 81.644(1) deg.  |
| Volume                            | 2024.42(19) Å <sup>3</sup>                                                                       |                            |
| Density (calculated)              | 1.33 g/cm <sup>3</sup>                                                                           |                            |
| Absorption coefficient            | 2.10 mm <sup>-1</sup>                                                                            |                            |
| Crystal shape                     | rectangular                                                                                      |                            |
| Crystal size                      | 0.211 x 0.100 x 0.092 mm <sup>3</sup>                                                            |                            |
| Crystal colour                    | brown                                                                                            |                            |
| Theta range for data collection   | 1.2 to 26.8 deg.                                                                                 |                            |
| Index ranges                      | -10 ≤ h ≤ 10, -18 ≤ k ≤ 18, -23 ≤ l ≤ 23                                                         |                            |
| Reflections collected             | 36522                                                                                            |                            |
| Independent reflections           | 8687 (R(int) = 0.0250)                                                                           |                            |
| Observed reflections              | 7240 (I > 2σ(I))                                                                                 |                            |
| Absorption correction             | Semi-empirical from equivalents                                                                  |                            |
| Max. and min. transmission        | 0.85 and 0.76                                                                                    |                            |
| Refinement method                 | Full-matrix least-squares on F <sup>2</sup>                                                      |                            |
| Data/restraints/parameters        | 8687 / 34 / 476                                                                                  |                            |
| Goodness-of-fit on F <sup>2</sup> | 1.04                                                                                             |                            |
| Final R indices (I > 2σ(I))       | R1 = 0.031, wR2 = 0.074                                                                          |                            |
| Largest diff. peak and hole       | 0.45 and -0.34 eÅ <sup>-3</sup>                                                                  |                            |



**Table S4.** Crystal structure, crystal data and structure refinement of **3d** (2178796).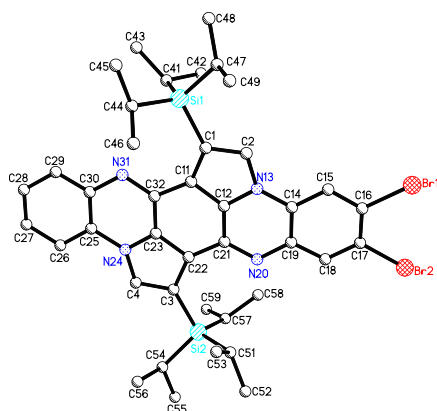

|                                   |                                             |                    |
|-----------------------------------|---------------------------------------------|--------------------|
| Identification code               | mai11sq                                     |                    |
| Empirical formula                 | $C_{40}H_{50}Br_2N_4Si_2$                   |                    |
| Formula weight                    | 802.84                                      |                    |
| Temperature                       | 200(2) K                                    |                    |
| Wavelength                        | 0.71073 Å                                   |                    |
| Crystal system                    | orthorhombic                                |                    |
| Space group                       | Pna2 <sub>1</sub>                           |                    |
| Z                                 | 8                                           |                    |
| Unit cell dimensions              | a = 14.9709(6) Å                            | $\alpha = 90$ deg. |
|                                   | b = 19.7156(7) Å                            | $\beta = 90$ deg.  |
|                                   | c = 28.6501(12) Å                           | $\gamma = 90$ deg. |
| Volume                            | 8456.4(6) Å <sup>3</sup>                    |                    |
| Density (calculated)              | 1.26 g/cm <sup>3</sup>                      |                    |
| Absorption coefficient            | 2.01 mm <sup>-1</sup>                       |                    |
| Crystal shape                     | plate                                       |                    |
| Crystal size                      | 0.107 x 0.075 x 0.020 mm <sup>3</sup>       |                    |
| Crystal colour                    | yellow                                      |                    |
| Theta range for data collection   | 1.3 to 25.0 deg.                            |                    |
| Index ranges                      | -17 ≤ h ≤ 17, -23 ≤ k ≤ 23, -34 ≤ l ≤ 34    |                    |
| Reflections collected             | 49689                                       |                    |
| Independent reflections           | 14847 (R(int) = 0.1348)                     |                    |
| Observed reflections              | 8311 (I > 2σ(I))                            |                    |
| Absorption correction             | Semi-empirical from equivalents             |                    |
| Max. and min. transmission        | 0.97 and 0.88                               |                    |
| Refinement method                 | Full-matrix least-squares on F <sup>2</sup> |                    |
| Data/restraints/parameters        | 14847 / 1843 / 868                          |                    |
| Goodness-of-fit on F <sup>2</sup> | 1.02                                        |                    |
| Final R indices (I > 2σ(I))       | R1 = 0.083, wR2 = 0.183                     |                    |
| Absolute structure parameter      | 0.48(2)                                     |                    |
| Largest diff. peak and hole       | 0.72 and -0.83 eÅ <sup>-3</sup>             |                    |

**Table S5.** Crystal structure, crystal data and structure refinement of **4b** (2178797).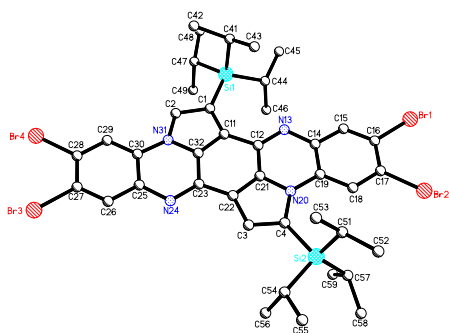

|                                   |                                                                                 |                           |
|-----------------------------------|---------------------------------------------------------------------------------|---------------------------|
| Identification code               | hek6                                                                            |                           |
| Empirical formula                 | C <sub>41</sub> H <sub>52</sub> Br <sub>4</sub> N <sub>4</sub> OSi <sub>2</sub> |                           |
| Formula weight                    | 992.68                                                                          |                           |
| Temperature                       | 200(2) K                                                                        |                           |
| Wavelength                        | 0.71073 Å                                                                       |                           |
| Crystal system                    | triclinic                                                                       |                           |
| Space group                       | P $\bar{1}$                                                                     |                           |
| Z                                 | 2                                                                               |                           |
| Unit cell dimensions              | a = 8.0736(9) Å                                                                 | $\alpha$ = 73.515(3) deg. |
|                                   | b = 14.8486(17) Å                                                               | $\beta$ = 87.505(3) deg.  |
|                                   | c = 18.764(2) Å                                                                 | $\gamma$ = 82.248(3) deg. |
| Volume                            | 2137.2(4) Å <sup>3</sup>                                                        |                           |
| Density (calculated)              | 1.54 g/cm <sup>3</sup>                                                          |                           |
| Absorption coefficient            | 3.86 mm <sup>-1</sup>                                                           |                           |
| Crystal shape                     | plate                                                                           |                           |
| Crystal size                      | 0.075 x 0.057 x 0.022 mm <sup>3</sup>                                           |                           |
| Crystal colour                    | brown                                                                           |                           |
| Theta range for data collection   | 1.1 to 23.9 deg.                                                                |                           |
| Index ranges                      | -9 ≤ h ≤ 9, -16 ≤ k ≤ 16, -21 ≤ l ≤ 21                                          |                           |
| Reflections collected             | 23667                                                                           |                           |
| Independent reflections           | 6611 (R(int) = 0.0940)                                                          |                           |
| Observed reflections              | 3494 (I > 2σ(I))                                                                |                           |
| Absorption correction             | Semi-empirical from equivalents                                                 |                           |
| Max. and min. transmission        | 0.93 and 0.79                                                                   |                           |
| Refinement method                 | Full-matrix least-squares on F <sup>2</sup>                                     |                           |
| Data/restraints/parameters        | 6611 / 412 / 471                                                                |                           |
| Goodness-of-fit on F <sup>2</sup> | 1.01                                                                            |                           |
| Final R indices (I > 2σ(I))       | R1 = 0.060, wR2 = 0.126                                                         |                           |
| Largest diff. peak and hole       | 0.81 and -0.47 eÅ <sup>-3</sup>                                                 |                           |

**Table S6.** Crystal structure, crystal data and structure refinement of **5c** (2178798).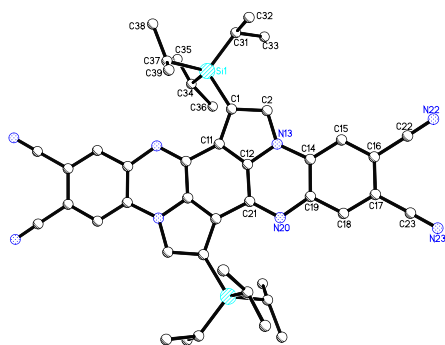

|                                   |                                                                                                                   |
|-----------------------------------|-------------------------------------------------------------------------------------------------------------------|
| Identification code               | hek17                                                                                                             |
| Empirical formula                 | C <sub>46</sub> H <sub>50</sub> Cl <sub>6</sub> N <sub>8</sub> Si <sub>2</sub>                                    |
| Formula weight                    | 983.82                                                                                                            |
| Temperature                       | 200(2) K                                                                                                          |
| Wavelength                        | 0.71073 Å                                                                                                         |
| Crystal system                    | monoclinic                                                                                                        |
| Space group                       | P2 <sub>1</sub> /n                                                                                                |
| Z                                 | 4                                                                                                                 |
| Unit cell dimensions              | a = 16.9519(14) Å    α = 90 deg.<br>b = 12.6352(10) Å    β = 99.9219(19) deg.<br>c = 23.2915(19) Å    γ = 90 deg. |
| Volume                            | 4914.2(7) Å <sup>3</sup>                                                                                          |
| Density (calculated)              | 1.33 g/cm <sup>3</sup>                                                                                            |
| Absorption coefficient            | 0.44 mm <sup>-1</sup>                                                                                             |
| Crystal shape                     | prism                                                                                                             |
| Crystal size                      | 0.098 x 0.050 x 0.040 mm <sup>3</sup>                                                                             |
| Crystal colour                    | orange                                                                                                            |
| Theta range for data collection   | 1.4 to 25.0 deg.                                                                                                  |
| Index ranges                      | -20 ≤ h ≤ 20, -14 ≤ k ≤ 15, -27 ≤ l ≤ 27                                                                          |
| Reflections collected             | 44952                                                                                                             |
| Independent reflections           | 8671 (R(int) = 0.0989)                                                                                            |
| Observed reflections              | 4939 (I > 2σ(I))                                                                                                  |
| Absorption correction             | Semi-empirical from equivalents                                                                                   |
| Max. and min. transmission        | 0.96 and 0.91                                                                                                     |
| Refinement method                 | Full-matrix least-squares on F <sup>2</sup>                                                                       |
| Data/restraints/parameters        | 8671 / 406 / 597                                                                                                  |
| Goodness-of-fit on F <sup>2</sup> | 1.03                                                                                                              |
| Final R indices (I > 2σ(I))       | R1 = 0.084, wR2 = 0.207                                                                                           |
| Largest diff. peak and hole       | 0.92 and -0.85 eÅ <sup>-3</sup>                                                                                   |

## 6 Computational Details

### 6.1 Calculations of the Optoelectronic Properties

Calculations were performed using Gaussian 16. TMS groups were used instead of TIPS groups to simplify calculations. First, the gas-phase ground-state equilibrium geometry of the molecules was optimized at the B3LYP/def2-SVP level of theory. Afterwards, the received geometries were refined using the B3LYP/def2-TZVP level of theory. FMO calculations were performed starting from the optimized geometries on the B3LYP/def2-TZVP level of theory.<sup>[6]</sup>

#### 6.1.1 FMO Calculations

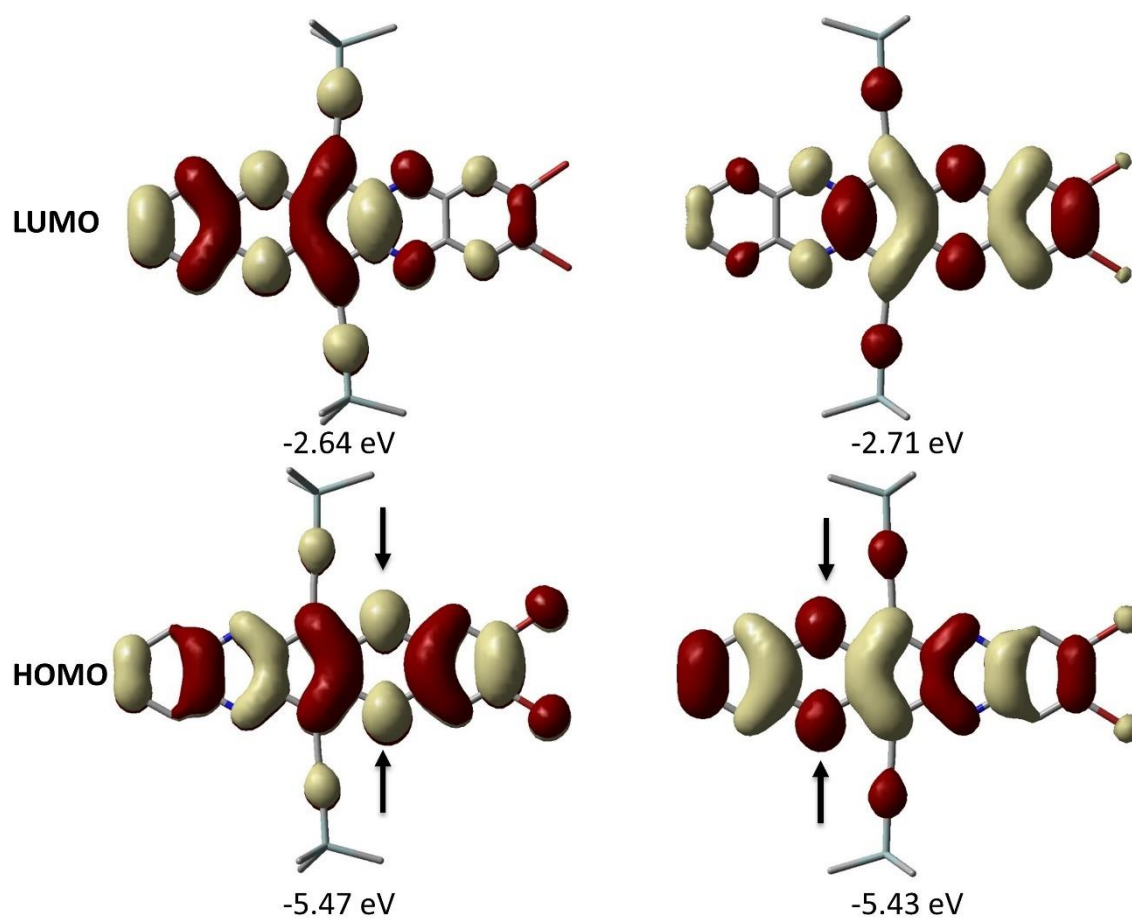

**Figure S39.** Calculated FMOs of the two isomers of 1. The position of the nitrogen atoms is marked by arrows.

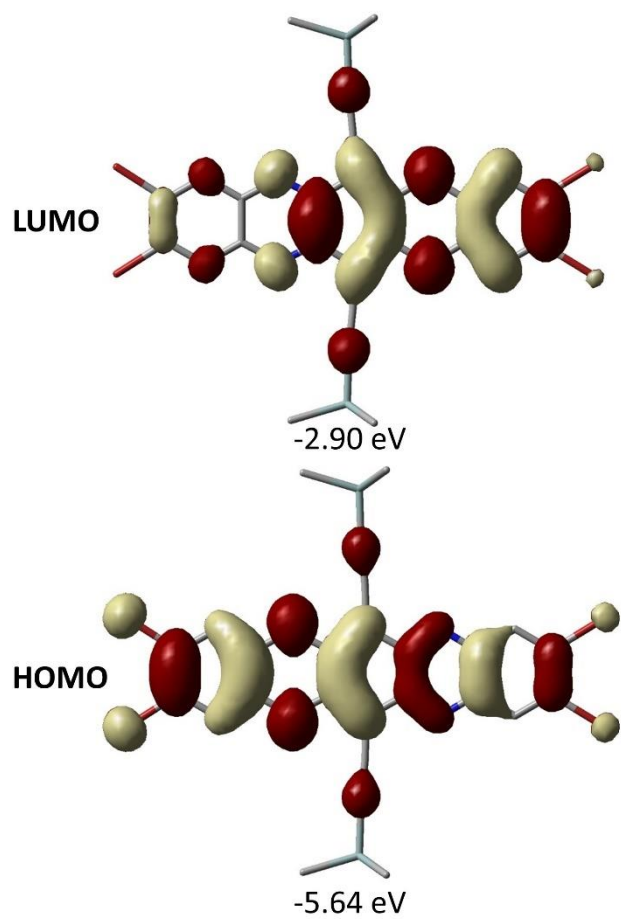

**Figure S40.** Calculated FMOs of the two isomers of **2**.

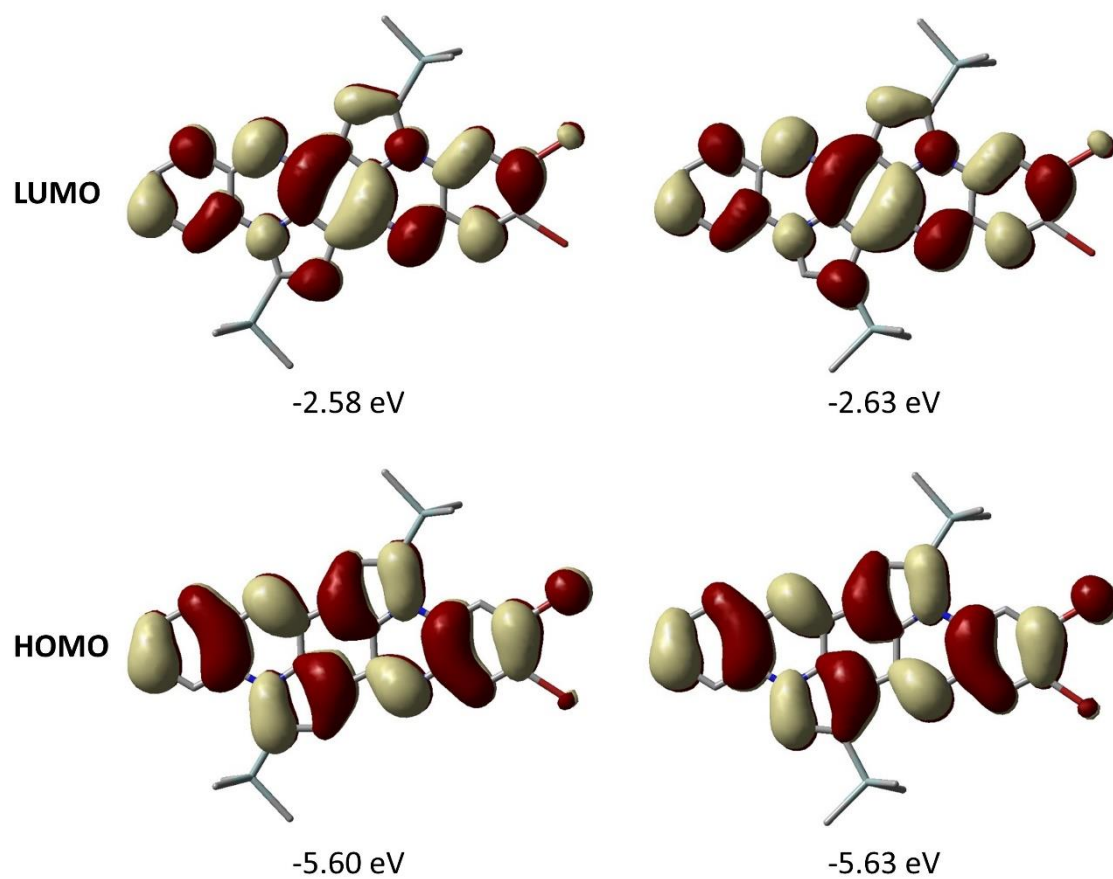

Figure S41. Calculated FMOs. Left: **3a**; Right: **3b**.

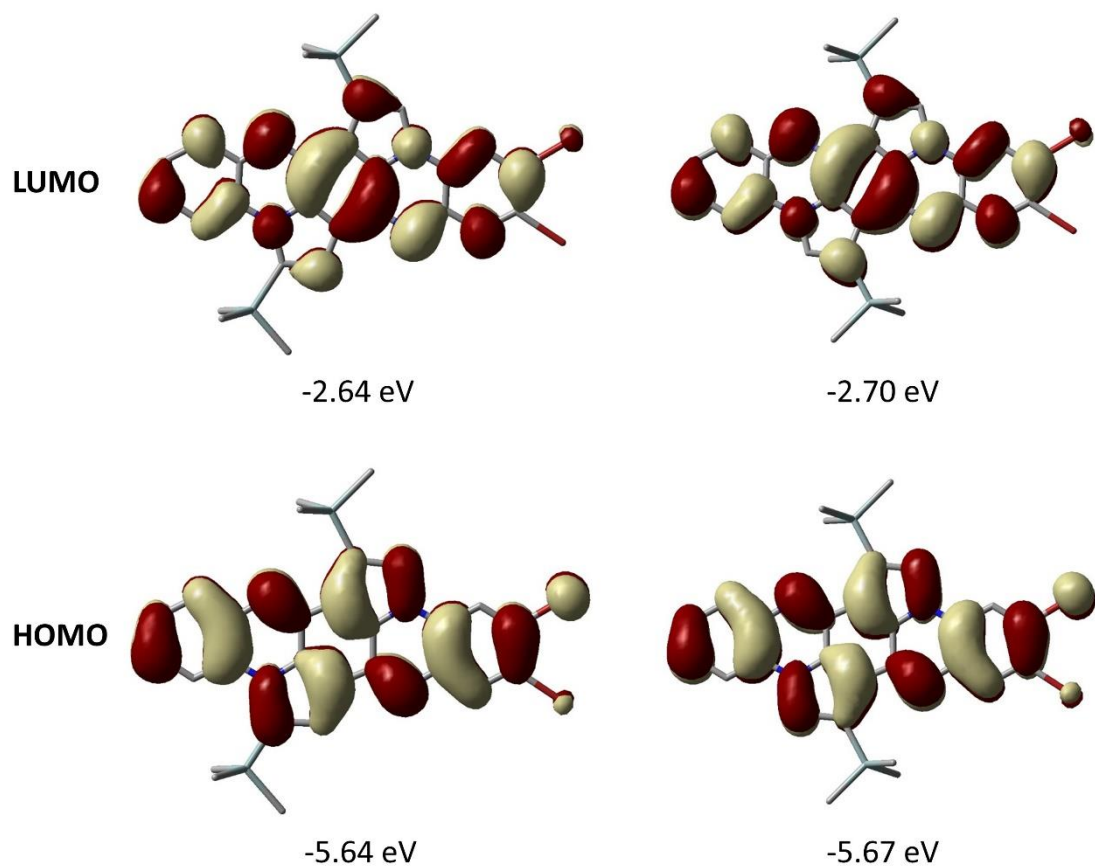

Figure S42. Calculated FMOs. Left: **3c**; Right: **3d**.

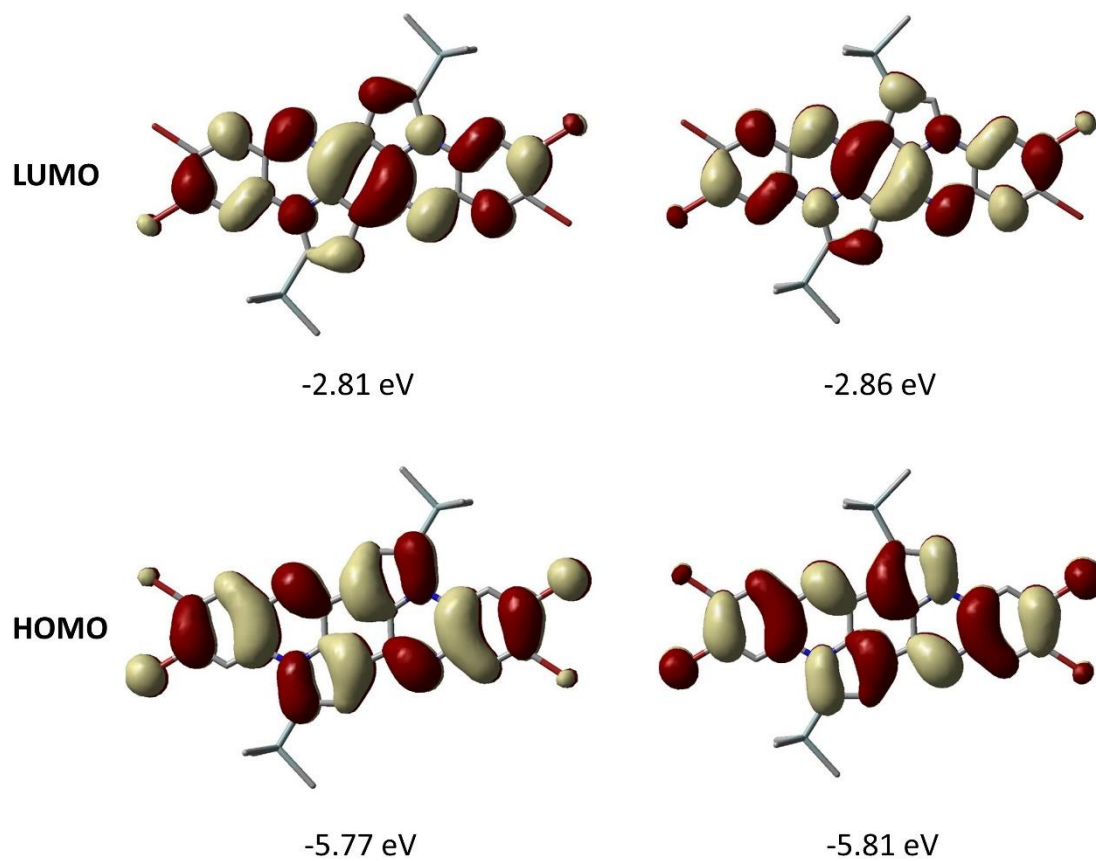

Figure S43. Calculated FMOs. Left: 4a; Right: 4b.



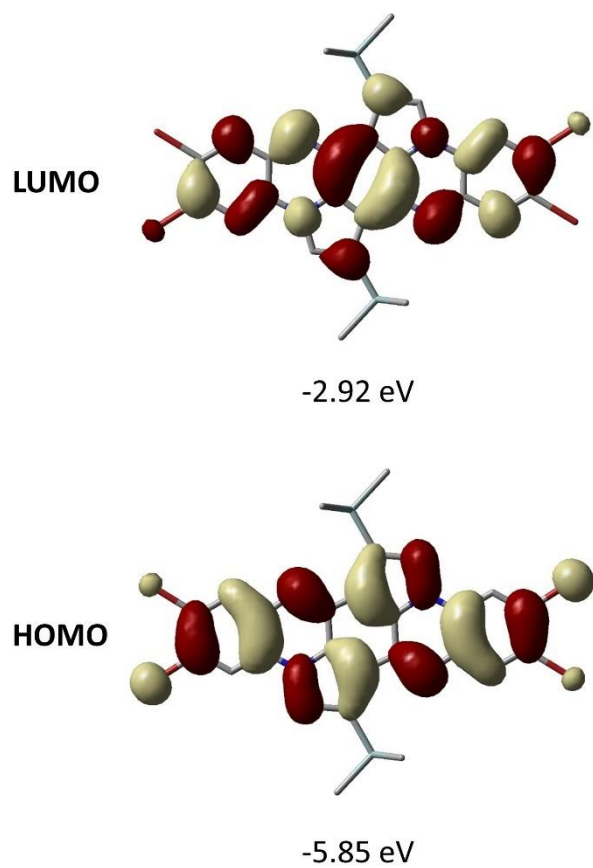

Figure S44. Calculated FMOs of 4c.

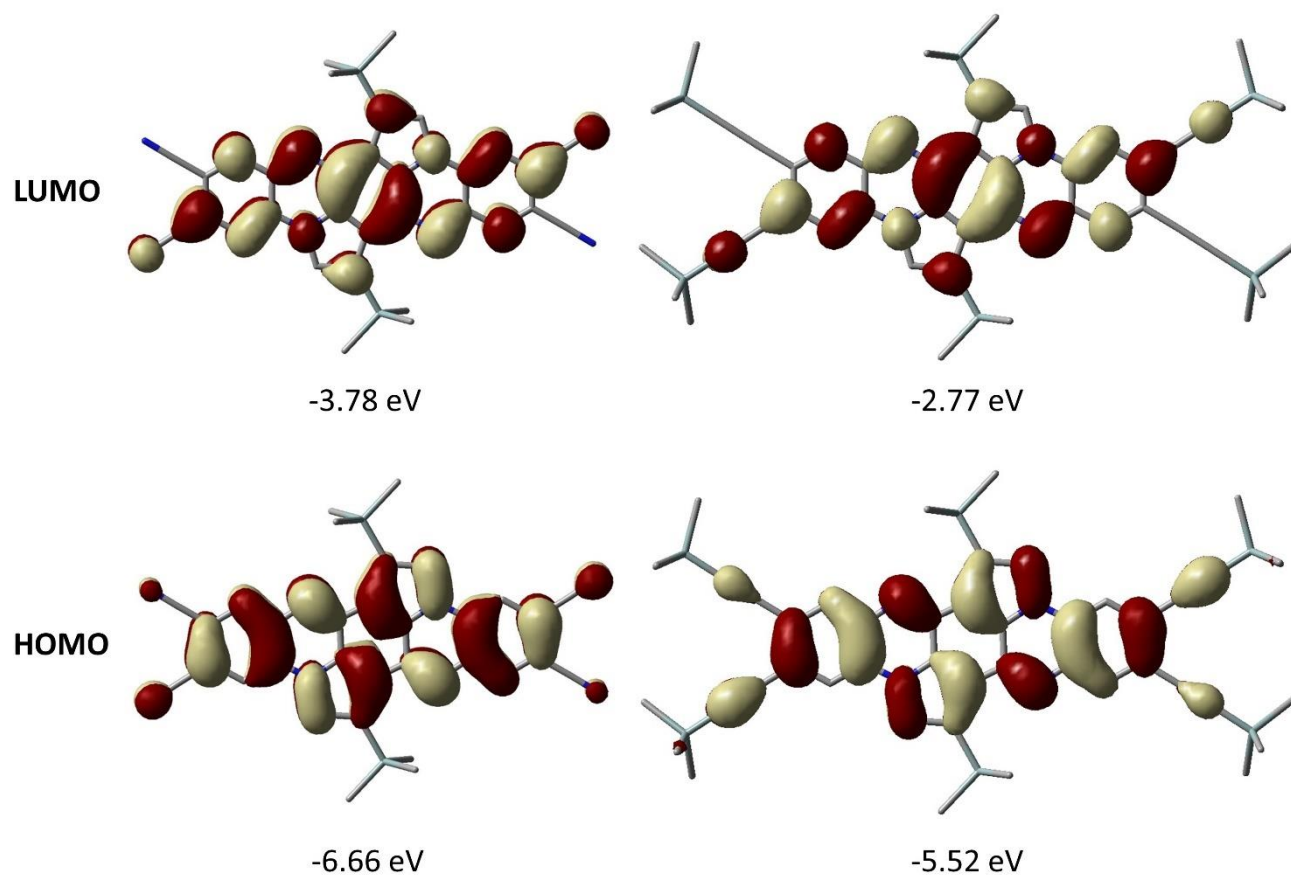

Figure S45. Calculated FMOs. Left: **5c**; Right: **6c**.

### 6.1.2 Calculation of Theoretical Electron Mobilities

Transfer integrals were calculated using the ADF program.<sup>[7]</sup> DZ Basis set and GGA PW91 as functional were used. The calculation was performed for each dimer pair of a crystal structure. The used dimers and the corresponding transfer integrals are shown below. Reorganization energies were calculated using the four point method. Therefore a geometry optimization of the isolated monomer in the gas phase was performed for the neutral ( $E_{(M)}$ ) and the anionic species ( $E_{(M^-)}$ ) was performed. Afterwards, single point energy calculations were performed starting from the coordinates of the neutral specie where the charge of the molecule was set negative ( $E_{(M^-)}$ ) and starting from the coordinates of the anionic specie where the charge was set neutral ( $E_{(M)}$ ).<sup>[8]</sup> A first geometry optimization was performed using Gaussian 16 and the B3LYP/def2svp level of theory. A second geometry optimization as well as single point calculations were performed using Gaussian 16 and the B3LYP/def2tzvp level of theory.

$$\begin{aligned}\lambda &= \lambda_1 + \lambda_2 \\ \lambda_1 &= E_{(M^-)} - E_{(M)} \\ \lambda_2 &= E_{(M)} - E_{(M^-)}\end{aligned}$$

The reorganization energies and the transfer integrals were used to calculate the electron transfer rate using the Marcus theory.<sup>[9]</sup> The results for all possible transfer paths are summarized in the figures below.

$$k_{ET} = \frac{4\pi}{h} \frac{V^2}{\sqrt{4\pi k_b T}} e^{-\frac{\lambda}{4k_b T}}$$

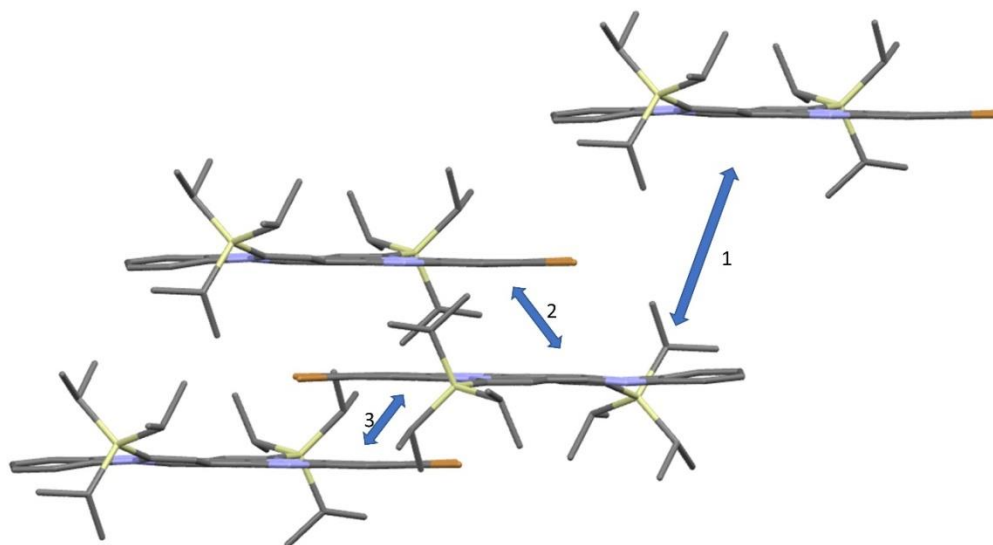

| Dimer pair | Transfer integral V (for e <sup>-</sup> ) [meV] | Reorganisation energy $\lambda$ [eV] | Electron transfer rate $K_{ET}$ [1/s] |
|------------|-------------------------------------------------|--------------------------------------|---------------------------------------|
| 1          | 0.02                                            | 277                                  | $4.06 \times 10^6$                    |
| 2          | 0.86                                            |                                      | $7.50 \times 10^9$                    |
| 3          | 7.85                                            |                                      | $6.24 \times 10^{13}$                 |

**Figure S46.** Top: Dimer Pairs of **3a** used for the calculation of transfer integrals. Bottom: Calculated transfer integrals, reorganization energy and electron transfer rate.

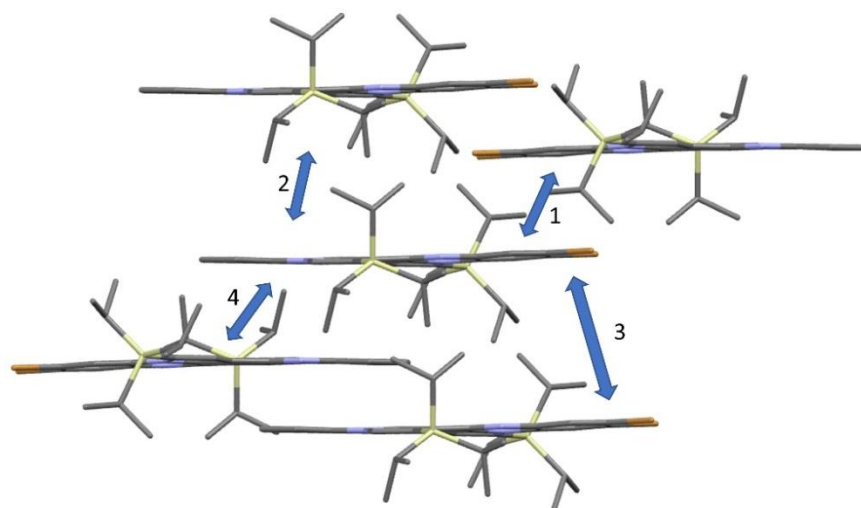

| Dimer pair | Transfer integral V (for e <sup>-</sup> ) [meV] | Reorganisation energy $\lambda$ [eV] | Electron transfer rate $K_{ET}$ [1/s] |
|------------|-------------------------------------------------|--------------------------------------|---------------------------------------|
| 1          | 30.1                                            | 282                                  | $9.10 \times 10^{12}$                 |
| 2          | 0.01                                            |                                      | $1.01 \times 10^6$                    |
| 3          | 0.01                                            |                                      | $1.01 \times 10^6$                    |
| 4          | 40.6                                            |                                      | $1.66 \times 10^{13}$                 |

**Figure S47.** Top: Dimer Pairs of **3b** used for the calculation of transfer integrals. Bottom: Calculated transfer integrals, reorganization energy and electron transfer rate.

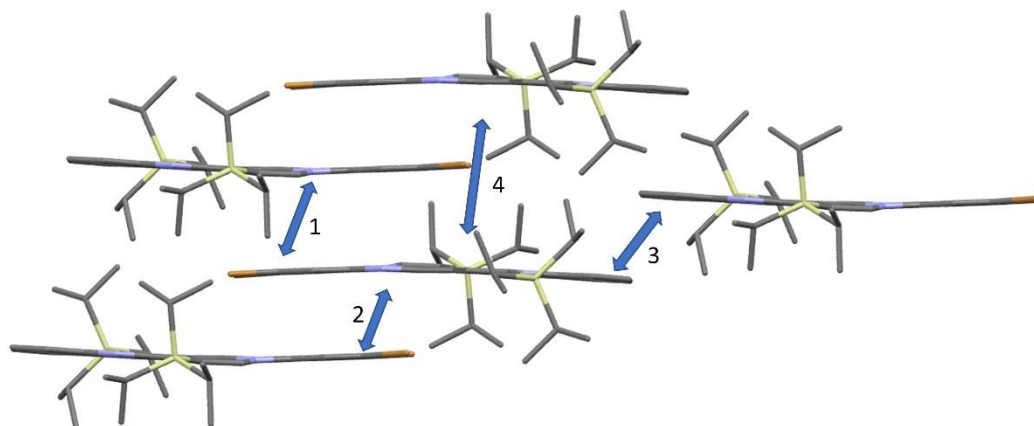

| Dimer pair | Transfer integral V<br>(for e <sup>-</sup> ) [meV] | Reorganisation<br>energy λ [eV] | Electron transfer<br>rate K <sub>ET</sub> [1/s] |
|------------|----------------------------------------------------|---------------------------------|-------------------------------------------------|
| 1          | 102                                                |                                 | 1.02x10 <sup>14</sup>                           |
| 2          | 6.38                                               | 284                             | 4.08x10 <sup>11</sup>                           |
| 3          | 0.12                                               |                                 | 1.44x10 <sup>8</sup>                            |
| 4          | 1.00                                               |                                 | 1.00x10 <sup>10</sup>                           |

**Figure S48.** Top: Dimer Pairs of **3c** used for the calculation of transfer integrals. Bottom: Calculated transfer integrals, reorganization energy and electron transfer rate.

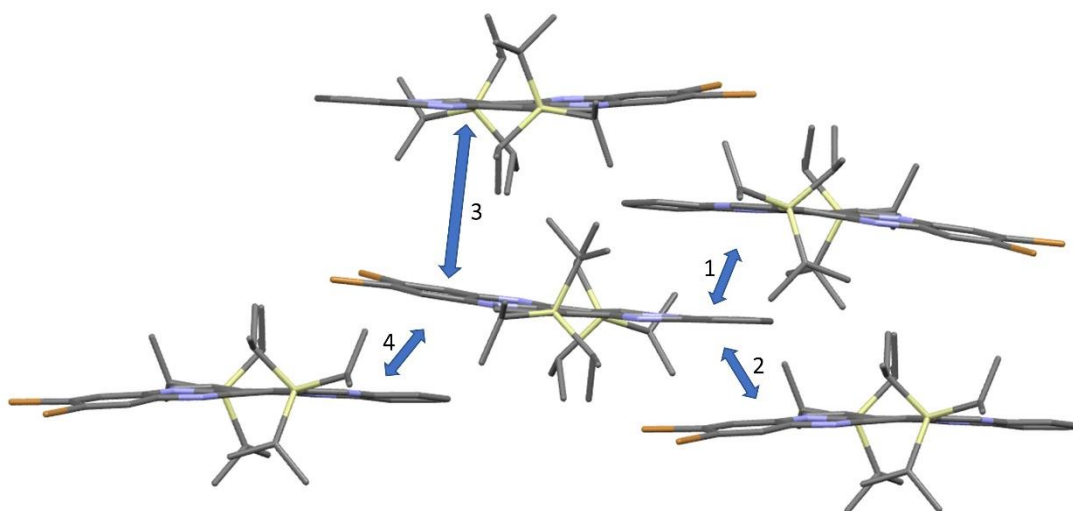

| Dimer pair | Transfer integral V<br>(for e <sup>-</sup> ) [meV] | Reorganisation<br>energy λ [eV] | Electron transfer<br>rate K <sub>ET</sub> [1/s] |
|------------|----------------------------------------------------|---------------------------------|-------------------------------------------------|
| 1          | 52.8                                               |                                 | 2.77x10 <sup>13</sup>                           |
| 2          | 8.45                                               | 288                             | 7.11x10 <sup>11</sup>                           |
| 3          | 1.67                                               |                                 | 2.78x10 <sup>10</sup>                           |
| 4          | 1.67                                               |                                 | 2.78x10 <sup>10</sup>                           |

**Figure S49.** Top: Dimer Pairs of **3d** used for the calculation of transfer integrals. Bottom: Calculated transfer integrals, reorganization energy and electron transfer rate.

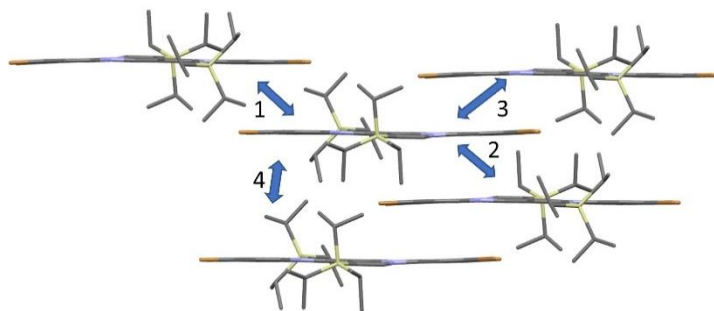

| Dimer pair | Transfer integral V (for e <sup>-</sup> ) [meV] | Reorganisation energy $\lambda$ [eV] | Electron transfer rate $K_{ET}$ [1/s] |
|------------|-------------------------------------------------|--------------------------------------|---------------------------------------|
| 1          | 13.2                                            | 280                                  | $1.76 \times 10^{12}$                 |
| 2          | 84.4                                            |                                      | $7.18 \times 10^{13}$                 |
| 3          | 7.04                                            |                                      | $5.00 \times 10^{11}$                 |
| 4          | 0.55                                            |                                      | $3.05 \times 10^9$                    |

**Figure S50.** Top: Dimer Pairs of **4b** used for the calculation of transfer integrals; Bottom: Calculated transfer integrals, reorganization energy and electron transfer rate.

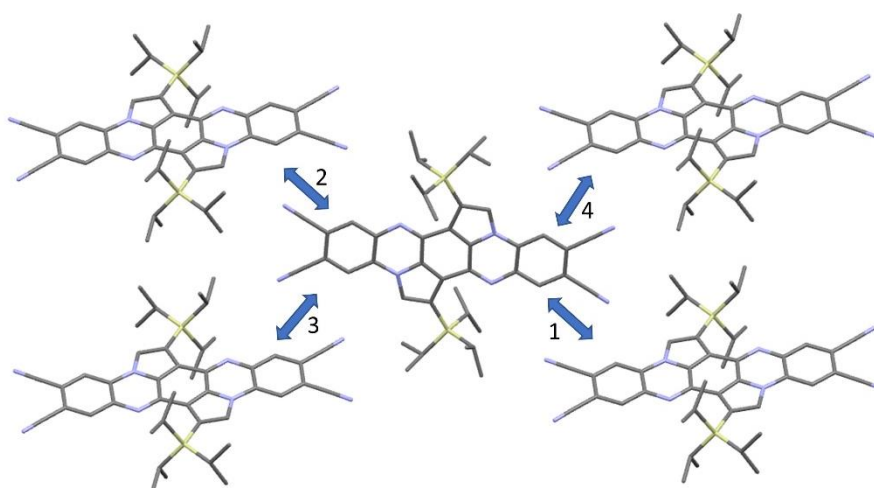

| Dimer pair | Transfer integral V (for e <sup>-</sup> ) [meV] | Reorganisation energy $\lambda$ [eV] | Electron transfer rate $K_{ET}$ [1/s] |
|------------|-------------------------------------------------|--------------------------------------|---------------------------------------|
| 1          | 3.24                                            | 271                                  | $1.08 \times 10^{11}$                 |
| 2          | 3.24                                            |                                      | $1.08 \times 10^{11}$                 |
| 3          | 3.24                                            |                                      | $1.08 \times 10^{11}$                 |
| 4          | 3.24                                            |                                      | $1.08 \times 10^{11}$                 |

**Figure S51.** Top: Dimer Pairs of **5c** used for the calculation of transfer integrals. Bottom: Calculated transfer integrals, reorganization energy and electron transfer rate.

Afterwards the theoretical electron mobility was calculated assuming a charge carrier diffusion in the crystal. The diffusion coefficient  $D$  was calculated as followed:<sup>[10,11]</sup>

$$D \approx \frac{1}{2n} \sum_i r_i^2 k_{ETi} P_i$$
$$P_i = \frac{k_{ETi}}{\sum_i k_{ETi}}$$

$n$ : Dimension;  $r_i$ : intermolecular distance between two molecules;  $P_i$ : Hopping probability for path  $i$ .

The theoretical electron mobility was calculated using the following formula:<sup>[10,12]</sup>

$$\mu_{theo} = \frac{e}{k_b T} D$$

The results are shown in the manuscript.

### 6.1.3 NICS<sub>zz</sub> XY-Scans

NICS<sub>zz</sub> XY-Scans were performed using Gaussian 16 starting from the optimized geometries on the B3LYP/def2-TZVP level of theory and the GIAO method. For the scan, every 0.1 Å a dummy atom was placed on a line which is placed in the center of the molecule. To minimize the influence of sigma electron density, the dummy atoms were placed 1.7 Å over the molecule.<sup>[13]</sup>

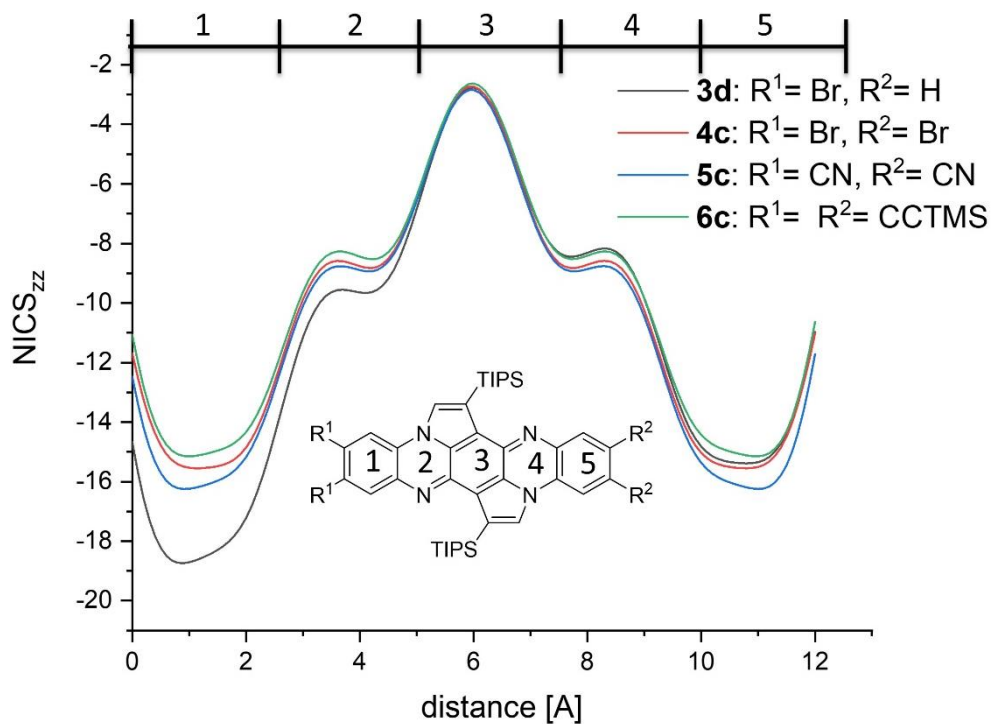

Figure S52. NICS<sub>zz</sub> XY-Scan of **3d** (black), **4c** (red), **5c** (blue) and **6c** (green).



## 6.1.4 Coordinates of the Optimized Geometries

1:

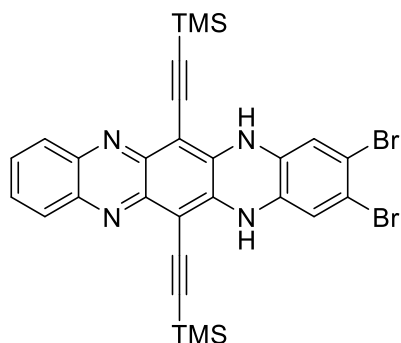

|    |             |             |             |
|----|-------------|-------------|-------------|
| C  | 7.67852300  | 0.70844900  | 0.00026600  |
| C  | 7.67850300  | -0.70866800 | 0.00023600  |
| C  | 6.50137100  | -1.40688400 | 0.00017100  |
| C  | 5.26396400  | -0.71538700 | 0.00013300  |
| C  | 5.26398400  | 0.71523600  | 0.00016300  |
| C  | 6.50141100  | 1.40669900  | 0.00023000  |
| N  | 4.10866400  | -1.40748100 | 0.00006900  |
| C  | 2.97868300  | -0.72203600 | 0.00003700  |
| C  | 2.97870400  | 0.72195000  | 0.00006600  |
| N  | 4.10870400  | 1.40736400  | 0.00012700  |
| C  | 1.72126200  | -1.43060700 | -0.00003600 |
| C  | 0.53607200  | -0.71762700 | -0.00009100 |
| C  | 0.53609200  | 0.71761100  | -0.00006300 |
| C  | 1.72130300  | 1.43055700  | 0.00002000  |
| N  | -0.68147100 | -1.35659100 | -0.00017800 |
| C  | -1.90314300 | -0.70277500 | -0.00024600 |
| C  | -1.90312300 | 0.70282800  | -0.00022000 |
| N  | -0.68143300 | 1.35661000  | -0.00012700 |
| C  | -3.10928400 | -1.38644500 | -0.00033700 |
| C  | -4.31992100 | -0.69499800 | -0.00040700 |
| C  | -4.31990100 | 0.69512100  | -0.00038200 |
| C  | -3.10924400 | 1.38653200  | -0.00028800 |
| C  | 1.67270600  | 2.84445800  | 0.00002700  |
| C  | 1.54746100  | 4.05344900  | 0.00007000  |
| C  | 1.67262500  | -2.84450600 | -0.00009700 |
| C  | 1.54733900  | -4.05349300 | -0.00009100 |
| Br | -5.92045000 | 1.71971000  | -0.00047400 |
| Br | -5.92049900 | -1.71954200 | -0.00053500 |
| Si | 1.48999500  | -5.89402300 | 0.00037800  |
| C  | 2.35979600  | -6.51389500 | 1.54426300  |
| C  | 2.35929800  | -6.51466500 | -1.54347800 |
| C  | -0.31226400 | -6.43025300 | 0.00079500  |
| Si | 1.49023000  | 5.89398200  | 0.00043700  |
| C  | 2.36062100  | 6.51450600  | -1.54285200 |
| C  | 2.35901800  | 6.51386700  | 1.54488800  |
| C  | -0.31199600 | 6.43032200  | -0.00038100 |
| H  | 8.62248000  | 1.23879200  | 0.00031700  |
| H  | 8.62244500  | -1.23903800 | 0.00026600  |
| H  | 6.47733100  | -2.48882700 | 0.00014800  |
| H  | 6.47740200  | 2.48864200  | 0.00025100  |
| H  | -0.65756900 | -2.36670100 | -0.00019900 |
| H  | -0.65750200 | 2.36671900  | -0.00011200 |
| H  | -3.11403000 | -2.46798100 | -0.00035700 |

|   |             |             |             |
|---|-------------|-------------|-------------|
| H | -3.11396000 | 2.46806900  | -0.00027000 |
| H | 1.86760500  | -6.15044000 | 2.44859000  |
| H | 2.36068100  | -7.60659700 | 1.57669700  |
| H | 3.39723100  | -6.17477400 | 1.57060200  |
| H | 1.86678200  | -6.15171300 | -2.44782900 |
| H | 2.36022200  | -7.60738400 | -1.57533100 |
| H | 3.39670900  | -6.17551100 | -1.57035000 |
| H | -0.39002600 | -7.52050600 | 0.00108100  |
| H | -0.83682700 | -6.06088800 | 0.88481200  |
| H | -0.83710200 | -6.06133600 | -0.88324700 |
| H | 1.86868500  | 6.15156100  | -2.44752200 |
| H | 2.36165300  | 7.60722300  | -1.57474200 |
| H | 3.39802200  | 6.17526700  | -1.56901400 |
| H | 1.86620400  | 6.15046500  | 2.44889600  |
| H | 2.35992900  | 7.60657000  | 1.57728700  |
| H | 3.39642200  | 6.17470500  | 1.57193700  |
| H | -0.83629300 | 6.06130000  | -0.88469900 |
| H | -0.83714600 | 6.06112700  | 0.88336000  |
| H | -0.38969200 | 7.52058000  | -0.00030900 |

## 1\_iso:

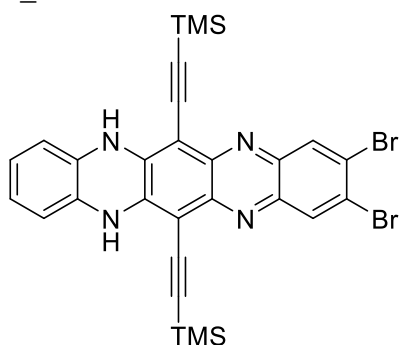

|   |             |             |             |
|---|-------------|-------------|-------------|
| C | -7.56026200 | 0.69480900  | -0.00005500 |
| C | -7.56026400 | -0.69478900 | -0.00005000 |
| C | -6.35676800 | -1.39159700 | -0.00003400 |
| C | -5.14982100 | -0.70182300 | -0.00002400 |
| C | -5.14982000 | 0.70183700  | -0.00002900 |
| C | -6.35676400 | 1.39161400  | -0.00004500 |
| N | -3.92255200 | -1.35370500 | -0.00000800 |
| C | -2.70859600 | -0.71892100 | -0.00000900 |
| C | -2.70859400 | 0.71892800  | -0.00001100 |
| N | -3.92254900 | 1.35371600  | -0.00001500 |
| C | -1.52127500 | -1.43163800 | -0.00000700 |
| C | -0.26539300 | -0.72392800 | -0.00000300 |
| C | -0.26539100 | 0.72392900  | -0.00000400 |
| C | -1.52127100 | 1.43164200  | -0.00000800 |
| N | 0.86439700  | -1.40918200 | 0.00000100  |
| C | 2.01747200  | -0.71259100 | 0.00000400  |
| C | 2.01747400  | 0.71258600  | 0.00000200  |
| N | 0.86440100  | 1.40917900  | -0.00000200 |
| C | 3.25226500  | -1.40112600 | 0.00000800  |
| C | 4.43552300  | -0.71095500 | 0.00001100  |
| C | 4.43552500  | 0.71094300  | 0.00001000  |
| C | 3.25226800  | 1.40111700  | 0.00000600  |
| C | -1.56921300 | 2.84541400  | -0.00001000 |
| C | -1.69265600 | 4.05465700  | -0.00000800 |

|    |             |             |             |
|----|-------------|-------------|-------------|
| C  | -1.56922100 | -2.84541000 | -0.00000900 |
| C  | -1.69266800 | -4.05465300 | -0.00000900 |
| Br | 6.05709300  | 1.70688000  | 0.00001500  |
| Br | 6.05708900  | -1.70689600 | 0.00001800  |
| Si | -1.74962000 | -5.89470900 | 0.00001200  |
| C  | -0.88097600 | -6.51689600 | 1.54352700  |
| C  | -0.88201900 | -6.51692000 | -1.54408200 |
| C  | -3.55269800 | -6.42997500 | 0.00061000  |
| Si | -1.74959700 | 5.89471400  | 0.00000500  |
| C  | -0.88074600 | 6.51693500  | -1.54337900 |
| C  | -0.88219700 | 6.51688300  | 1.54422900  |
| C  | -3.55267400 | 6.42998700  | -0.00083000 |
| H  | -8.49388100 | 1.24094500  | -0.00006800 |
| H  | -8.49388400 | -1.24092200 | -0.00005700 |
| H  | -6.34943500 | -2.47495500 | -0.00002900 |
| H  | -6.34942800 | 2.47497200  | -0.00005000 |
| H  | -3.90006800 | -2.36398000 | -0.00001200 |
| H  | -3.90006200 | 2.36399000  | -0.00002400 |
| H  | 3.23571500  | -2.48158500 | 0.00000900  |
| H  | 3.23572200  | 2.48157700  | 0.00000500  |
| H  | -1.37117200 | -6.15134300 | 2.44810000  |
| H  | -0.88365100 | -7.60958700 | 1.57641400  |
| H  | 0.15770700  | -6.18156900 | 1.56908300  |
| H  | -1.37286900 | -6.15144600 | -2.44833200 |
| H  | -0.88465500 | -7.60961400 | -1.57690800 |
| H  | 0.15662800  | -6.18153800 | -1.57038300 |
| H  | -3.63116300 | -7.52018400 | 0.00065500  |
| H  | -4.07651800 | -6.06011900 | 0.88488700  |
| H  | -4.07708700 | -6.06015500 | -0.88334600 |
| H  | -1.37088600 | 6.15149600  | -2.44802800 |
| H  | -0.88332100 | 7.60962900  | -1.57618100 |
| H  | 0.15791100  | 6.18151900  | -1.56885900 |
| H  | -1.37310100 | 6.15129400  | 2.44840400  |
| H  | -0.88492900 | 7.60957300  | 1.57714200  |
| H  | 0.15647600  | 6.18158700  | 1.57060100  |
| H  | -4.07638800 | 6.06007500  | -0.88514600 |
| H  | -4.07716900 | 6.06022700  | 0.88308700  |
| H  | -3.63113500 | 7.52019700  | -0.00095500 |

2:

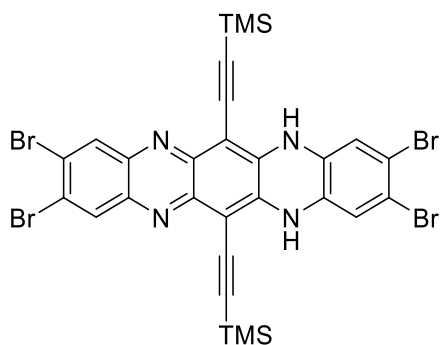

|   |            |             |            |
|---|------------|-------------|------------|
| C | 6.04414900 | 0.71157300  | 0.00009100 |
| C | 6.04414900 | -0.71157500 | 0.00009600 |
| C | 4.86157100 | -1.40177400 | 0.00006800 |
| C | 3.62632800 | -0.71297400 | 0.00003400 |

|    |             |             |             |
|----|-------------|-------------|-------------|
| C  | 3.62632800  | 0.71297300  | 0.00002800  |
| C  | 4.86157200  | 1.40177200  | 0.00005700  |
| N  | 2.47416100  | -1.40899100 | 0.00000700  |
| C  | 1.34408300  | -0.72335600 | -0.00002400 |
| C  | 1.34408300  | 0.72335500  | -0.00003000 |
| N  | 2.47416200  | 1.40899000  | -0.00000400 |
| C  | 0.08837700  | -1.43185000 | -0.00005200 |
| C  | -1.09693300 | -0.71800500 | -0.00009000 |
| C  | -1.09693300 | 0.71800500  | -0.00009500 |
| C  | 0.08837800  | 1.43185000  | -0.00006200 |
| N  | -2.31290900 | -1.35621200 | -0.00013300 |
| C  | -3.53514500 | -0.70251700 | -0.00009900 |
| C  | -3.53514500 | 0.70251900  | -0.00010500 |
| N  | -2.31290900 | 1.35621300  | -0.00014400 |
| C  | -4.74098800 | -1.38684100 | -0.00006900 |
| C  | -5.95119200 | -0.69538800 | -0.00004800 |
| C  | -5.95119200 | 0.69539000  | -0.00005500 |
| C  | -4.74098700 | 1.38684300  | -0.00008300 |
| C  | 0.03978600  | 2.84579500  | -0.00006400 |
| C  | -0.08436300 | 4.05478000  | -0.00006300 |
| C  | 0.03978500  | -2.84579500 | -0.00004300 |
| C  | -0.08436600 | -4.05478000 | -0.00003700 |
| Br | -7.55156400 | 1.71904500  | -0.00002800 |
| Br | -7.55156400 | -1.71904200 | -0.00001100 |
| Br | 7.66555900  | 1.70607100  | 0.00012800  |
| Br | 7.66555800  | -1.70607400 | 0.00014200  |
| Si | -0.14322900 | -5.89704300 | -0.00003000 |
| C  | 0.72542000  | -6.51561100 | 1.54442300  |
| C  | 0.72553700  | -6.51561000 | -1.54441800 |
| C  | -1.94666200 | -6.42841300 | -0.00009300 |
| Si | -0.14322400 | 5.89704300  | -0.00002800 |
| C  | 0.72578100  | 6.51563600  | -1.54427000 |
| C  | 0.72519400  | 6.51558400  | 1.54456700  |
| C  | -1.94665700 | 6.42841400  | -0.00034900 |
| H  | 4.84496200  | -2.48221100 | 0.00007200  |
| H  | 4.84496400  | 2.48220900  | 0.00005300  |
| H  | -2.28876800 | -2.36657200 | -0.00010300 |
| H  | -2.28876700 | 2.36657300  | -0.00012400 |
| H  | -4.74558400 | -2.46837200 | -0.00006400 |
| H  | -4.74558300 | 2.46837400  | -0.00008800 |
| H  | 0.23503200  | -6.14904700 | 2.44845400  |
| H  | 0.72240000  | -7.60822500 | 1.57874200  |
| H  | 1.76422900  | -6.18070300 | 1.56958200  |
| H  | 0.23484200  | -6.14956100 | -2.44849100 |
| H  | 0.72308300  | -7.60823500 | -1.57842800 |
| H  | 1.76416700  | -6.18016700 | -1.56980300 |
| H  | -2.02647400 | -7.51849600 | -0.00002900 |
| H  | -2.47066400 | -6.05849400 | 0.88401800  |
| H  | -2.47056400 | -6.05860300 | -0.88430900 |
| H  | 0.23526100  | 6.14955600  | -2.44842600 |
| H  | 0.72328400  | 7.60826100  | -1.57829000 |
| H  | 1.76443100  | 6.18023900  | -1.56947100 |
| H  | 0.23463500  | 6.14906000  | 2.44852100  |
| H  | 0.72222700  | 7.60819900  | 1.57887100  |
| H  | 1.76398100  | 6.18062200  | 1.56990500  |
| H  | -2.47040700 | 6.05869100  | -0.88469100 |

|   |             |            |             |
|---|-------------|------------|-------------|
| H | -2.47080900 | 6.05840800 | 0.88363600  |
| H | -2.02646900 | 7.51849700 | -0.00018900 |

**3a:**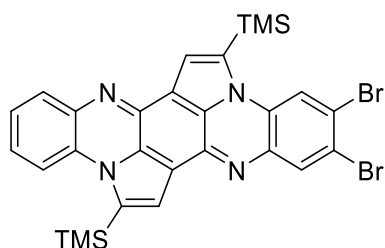

|    |             |             |             |
|----|-------------|-------------|-------------|
| C  | 7.44609900  | 1.59933400  | -0.00073700 |
| C  | 7.02181700  | 2.92976500  | -0.00082300 |
| C  | 5.67336200  | 3.21372100  | -0.00073300 |
| C  | 4.70556500  | 2.19390600  | -0.00055100 |
| C  | 5.15382500  | 0.83930100  | -0.00046900 |
| C  | 6.52211900  | 0.57000000  | -0.00056400 |
| N  | 3.38188000  | 2.57718900  | -0.00047600 |
| C  | 2.48964700  | 1.62513900  | -0.00030700 |
| C  | 2.85831200  | 0.24701300  | -0.00021800 |
| N  | 4.16982400  | -0.16025300 | -0.00030900 |
| C  | 1.05519100  | 1.82824400  | -0.00022700 |
| C  | 0.22167200  | 0.72067600  | -0.00008200 |
| C  | 0.59100600  | -0.65817600 | -0.00001300 |
| C  | 2.02281000  | -0.86107900 | -0.00008900 |
| N  | -1.09196600 | 1.13003100  | -0.00001700 |
| C  | -2.07171900 | 0.12906900  | 0.00017500  |
| C  | -1.62254900 | -1.22385500 | 0.00023000  |
| N  | -0.30247300 | -1.61193900 | 0.00013200  |
| C  | -3.43670600 | 0.39478300  | 0.00032800  |
| C  | -4.36832700 | -0.63060400 | 0.00051000  |
| C  | -3.94203100 | -1.96316600 | 0.00054500  |
| C  | -2.59044000 | -2.23930900 | 0.00041100  |
| C  | 2.87714100  | -1.98392000 | -0.00005100 |
| C  | 4.20465300  | -1.56885900 | -0.00021000 |
| C  | 0.20098500  | 2.95119200  | -0.00030300 |
| C  | -1.12709500 | 2.53726200  | -0.00013700 |
| Br | -5.16283800 | -3.42115700 | 0.00078500  |
| Br | -6.20805100 | -0.15086100 | 0.00071200  |
| Si | -2.53830000 | 3.79864300  | -0.00023300 |
| C  | -1.72211500 | 5.49335900  | -0.00058800 |
| C  | -3.59015300 | 3.68089600  | 1.55866200  |
| C  | -3.59039800 | 3.68034800  | -1.55892000 |
| Si | 5.61299400  | -2.83067300 | -0.00031500 |
| C  | 4.79831000  | -4.52650600 | -0.00047100 |
| C  | 6.66614400  | -2.71832500 | 1.55911000  |
| C  | 6.66614900  | -2.71802300 | -1.55971000 |
| H  | 8.50241600  | 1.36377000  | -0.00080400 |
| H  | 7.74741200  | 3.73260700  | -0.00096300 |
| H  | 5.30950500  | 4.23248700  | -0.00079800 |
| H  | 6.87235600  | -0.44698400 | -0.00050100 |
| H  | -3.79463800 | 1.40789700  | 0.00031900  |
| H  | -2.23612100 | -3.25984200 | 0.00044700  |
| H  | 2.55387400  | -3.01062600 | 0.00006100  |
| H  | 0.52477600  | 3.97770800  | -0.00044200 |

|   |             |             |             |
|---|-------------|-------------|-------------|
| H | -1.10308400 | 5.65483100  | -0.88497300 |
| H | -2.49999600 | 6.26137900  | -0.00071800 |
| H | -1.10303800 | 5.65518000  | 0.88370200  |
| H | -4.13187400 | 2.74192400  | 1.67312100  |
| H | -4.32988700 | 4.48617400  | 1.56021000  |
| H | -2.96220600 | 3.80776900  | 2.44368200  |
| H | -4.33014900 | 4.48560900  | -1.56062300 |
| H | -2.96259600 | 3.80693400  | -2.44408400 |
| H | -4.13211400 | 2.74132400  | -1.67297000 |
| H | 4.17927300  | -4.68870900 | -0.88471900 |
| H | 5.57658600  | -5.29419900 | -0.00059400 |
| H | 4.17935100  | -4.68891300 | 0.88379500  |
| H | 7.18351900  | -1.76777700 | 1.68867500  |
| H | 7.42287400  | -3.50764200 | 1.54836100  |
| H | 6.04112800  | -2.87293200 | 2.44183900  |
| H | 7.42282000  | -3.50739900 | -1.54914100 |
| H | 6.04113100  | -2.87237100 | -2.44248100 |
| H | 7.18359500  | -1.76747900 | -1.68903100 |

**3b:**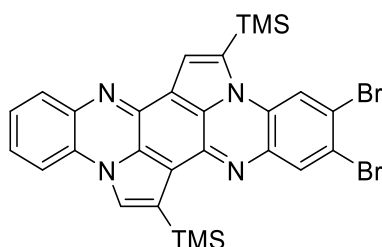

|    |             |             |             |
|----|-------------|-------------|-------------|
| C  | 8.01496000  | 0.91557400  | 0.00000700  |
| C  | 7.73909000  | 2.28638200  | -0.00000800 |
| C  | 6.43263800  | 2.72993400  | -0.00001900 |
| C  | 5.35489100  | 1.82778600  | -0.00001600 |
| C  | 5.65950700  | 0.43806200  | -0.00000100 |
| C  | 6.98189500  | -0.00433900 | 0.00001200  |
| N  | 4.07230200  | 2.33880900  | -0.00002300 |
| C  | 3.08376400  | 1.48362400  | -0.00001700 |
| C  | 3.30492600  | 0.07489700  | -0.00001100 |
| N  | 4.57310400  | -0.43725600 | -0.00000100 |
| C  | 1.67696500  | 1.82233300  | -0.00000300 |
| C  | 0.74631300  | 0.79363000  | 0.00002600  |
| C  | 0.98230600  | -0.61833400 | 0.00003200  |
| C  | 2.38757400  | -0.96938300 | 0.00000500  |
| N  | -0.52388000 | 1.32627700  | 0.00002100  |
| C  | -1.59723600 | 0.42748000  | 0.00001600  |
| C  | -1.28284400 | -0.96186400 | 0.00001600  |
| N  | -0.00663300 | -1.47491800 | 0.00002300  |
| C  | -2.92963300 | 0.82557800  | 0.00002200  |
| C  | -3.95745900 | -0.10335100 | 0.00002300  |
| C  | -3.66371200 | -1.47117200 | 0.00002000  |
| C  | -2.34547100 | -1.87797600 | 0.00001800  |
| C  | 3.13962000  | -2.19360800 | -0.00004900 |
| C  | 4.47174100  | -1.81389300 | 0.00001800  |
| C  | 0.93148000  | 3.01967200  | -0.00002100 |
| C  | -0.42835100 | 2.73080600  | 0.00004700  |
| Br | -5.02087100 | -2.80268000 | 0.00002300  |
| Br | -5.74113400 | 0.55416100  | 0.00003400  |
| Si | -1.71397100 | 4.12089400  | 0.00006800  |

|    |             |             |             |
|----|-------------|-------------|-------------|
| C  | -0.74038400 | 5.73031600  | -0.00005900 |
| C  | -2.77112800 | 4.10387000  | 1.55961700  |
| C  | -2.77130000 | 4.10370600  | -1.55936100 |
| Si | 2.56226300  | -3.98859300 | -0.00012100 |
| C  | 1.55703800  | -4.34076200 | 1.54720400  |
| C  | 4.10264300  | -5.07750700 | -0.00008300 |
| C  | 1.55716700  | -4.34069000 | -1.54754800 |
| H  | 9.03958100  | 0.56752400  | 0.00001700  |
| H  | 8.55234500  | 3.00038100  | -0.00001100 |
| H  | 6.19461100  | 3.78530300  | -0.00002900 |
| H  | 7.19865400  | -1.06392900 | 0.00002400  |
| H  | -3.18687900 | 1.86865500  | 0.00003100  |
| H  | -2.09563700 | -2.92890600 | 0.00001900  |
| H  | 5.35404400  | -2.42883400 | 0.00003400  |
| H  | 1.34989300  | 4.01132700  | -0.00004700 |
| H  | -0.10891900 | 5.83275100  | -0.88446300 |
| H  | -1.44213600 | 6.56849400  | -0.00003800 |
| H  | -0.10879200 | 5.83281400  | 0.88424600  |
| H  | -3.39799500 | 3.21981600  | 1.67637000  |
| H  | -3.43233300 | 4.97477800  | 1.56060400  |
| H  | -2.13291500 | 4.17304700  | 2.44370600  |
| H  | -3.43250800 | 4.97461200  | -1.56037000 |
| H  | -2.13318500 | 4.17278600  | -2.44352800 |
| H  | -3.39817200 | 3.21963200  | -1.67594100 |
| H  | 0.67915800  | -3.69496500 | 1.58957800  |
| H  | 1.21744000  | -5.37990300 | 1.55922400  |
| H  | 2.14855200  | -4.17265200 | 2.45014800  |
| H  | 4.72204300  | -4.91145800 | -0.88477000 |
| H  | 3.81339000  | -6.13158500 | -0.00012200 |
| H  | 4.72196900  | -4.91150300 | 0.88466400  |
| H  | 0.67929400  | -3.69488900 | -1.58996500 |
| H  | 2.14875900  | -4.17254000 | -2.45043300 |
| H  | 1.21756900  | -5.37983100 | -1.55964500 |

**3c:**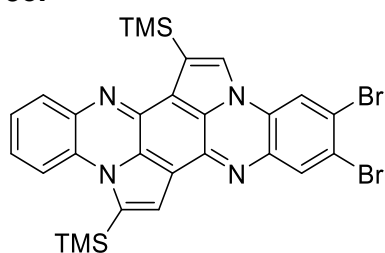

|   |             |             |             |
|---|-------------|-------------|-------------|
| C | -6.91210000 | 1.81310000  | 0.00024000  |
| C | -7.14308400 | 0.43600700  | 0.00050400  |
| C | -6.08212800 | -0.45136000 | 0.00048800  |
| C | -4.76596200 | 0.00969800  | 0.00019600  |
| C | -4.51482700 | 1.41311600  | 0.00001100  |
| C | -5.61761200 | 2.28552000  | 0.00001300  |
| N | -3.64970100 | -0.83846500 | 0.00013100  |
| C | -2.40627500 | -0.25212200 | 0.00012800  |
| C | -2.23395200 | 1.16796900  | -0.00002200 |
| N | -3.25840300 | 1.97817200  | -0.00012100 |
| C | -1.42866900 | -1.23852400 | 0.00020500  |
| C | -0.04091200 | -0.83811100 | 0.00019200  |
| C | 0.11820100  | 0.57985900  | 0.00007300  |
| C | -0.84290900 | 1.58187500  | -0.00002700 |

|    |             |             |             |
|----|-------------|-------------|-------------|
| N  | 0.98585700  | -1.65040500 | 0.00022700  |
| C  | 2.24022500  | -1.07909500 | 0.00014900  |
| C  | 2.48430000  | 0.32113200  | 0.00001400  |
| N  | 1.36414600  | 1.15004200  | -0.00002800 |
| C  | 3.35608700  | -1.92865400 | 0.00018600  |
| C  | 4.64638200  | -1.43559200 | 0.00010200  |
| C  | 4.86348600  | -0.05113700 | -0.00003000 |
| C  | 3.78326800  | 0.81684100  | -0.00007600 |
| C  | -0.14699000 | 2.83849200  | -0.00004300 |
| C  | 1.20135500  | 2.51992100  | -0.00019100 |
| C  | -2.12018400 | -2.46777500 | 0.00016200  |
| C  | -3.49116600 | -2.23860500 | 0.00015800  |
| Br | 6.60624200  | 0.70539300  | -0.00015800 |
| Br | 6.08264000  | -2.68290200 | 0.00016500  |
| Si | -4.71074600 | -3.68463200 | -0.00025800 |
| C  | -3.66725300 | -5.25004600 | -0.00071300 |
| C  | -5.76800500 | -3.71982000 | -1.56042900 |
| C  | -5.76805500 | -3.72085600 | 1.55986500  |
| Si | -0.80595200 | 4.60571200  | -0.00004900 |
| C  | -1.82647700 | 4.91042900  | 1.54725200  |
| C  | -1.82684100 | 4.91025300  | -1.54714500 |
| C  | 0.68323400  | 5.76315900  | -0.00029100 |
| H  | -7.74415200 | 2.50495200  | 0.00024400  |
| H  | -8.15517200 | 0.05271200  | 0.00073800  |
| H  | -6.28451800 | -1.50758000 | 0.00074800  |
| H  | -5.40504900 | 3.34616700  | -0.00015000 |
| H  | 3.17400100  | -2.99355900 | 0.00028500  |
| H  | 3.96241700  | 1.88177000  | -0.00017900 |
| H  | 2.05486200  | 3.17458200  | -0.00030300 |
| H  | -1.65838700 | -3.44002300 | 0.00013700  |
| H  | -3.03172300 | -5.32490300 | 0.88354300  |
| H  | -4.33101100 | -6.11867400 | -0.00098200 |
| H  | -3.03169300 | -5.32436200 | -0.88499300 |
| H  | -6.41076000 | -2.84954500 | -1.69239100 |
| H  | -6.40916200 | -4.60557800 | -1.54916600 |
| H  | -5.12647200 | -3.78866600 | -2.44217600 |
| H  | -6.40921800 | -4.60660300 | 1.54797700  |
| H  | -5.12653500 | -3.79032100 | 2.44157300  |
| H  | -6.41081400 | -2.85067600 | 1.69244500  |
| H  | -1.22917000 | 4.76615200  | 2.45049200  |
| H  | -2.21040100 | 5.93404400  | 1.56106400  |
| H  | -2.67553300 | 4.22699500  | 1.58656100  |
| H  | -1.22974000 | 4.76590300  | -2.45051100 |
| H  | -2.21079200 | 5.93385800  | -1.56096700 |
| H  | -2.67589400 | 4.22679800  | -1.58619300 |
| H  | 1.30977100  | 5.62594400  | 0.88431400  |
| H  | 1.30957000  | 5.62582900  | -0.88502000 |
| H  | 0.34633900  | 6.80298800  | -0.00032100 |



**3d:**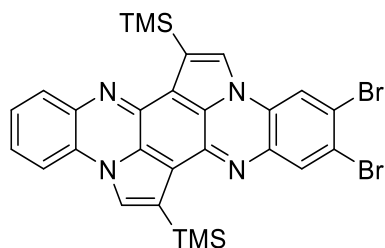

|    |             |             |             |
|----|-------------|-------------|-------------|
| C  | 7.55257500  | 0.90981800  | -0.00001100 |
| C  | 7.59117200  | -0.48789000 | -0.00001000 |
| C  | 6.41744000  | -1.21315000 | -0.00000400 |
| C  | 5.16485700  | -0.57517500 | 0.00000200  |
| C  | 5.15008300  | 0.84625700  | 0.00000100  |
| C  | 6.33945600  | 1.57436100  | -0.00000700 |
| N  | 4.02811800  | -1.35833500 | 0.00000500  |
| C  | 2.86820500  | -0.75259400 | 0.00000800  |
| C  | 2.77041300  | 0.67390700  | 0.00001000  |
| N  | 3.89510000  | 1.45407500  | 0.00000600  |
| C  | 1.57462200  | -1.40651900 | 0.00001000  |
| C  | 0.45402300  | -0.58462100 | 0.00000300  |
| C  | 0.35693800  | 0.84299800  | 0.00000200  |
| C  | 1.64793500  | 1.49584900  | 0.00001200  |
| N  | -0.67201200 | -1.36728200 | -0.00001000 |
| C  | -1.92351300 | -0.75610200 | -0.00002000 |
| C  | -1.93650900 | 0.66405300  | -0.00001700 |
| N  | -0.80472200 | 1.45026300  | -0.00000600 |
| C  | -3.11128700 | -1.47895300 | -0.00003600 |
| C  | -4.33074800 | -0.82083700 | -0.00004700 |
| C  | -4.36755600 | 0.57987100  | -0.00004300 |
| C  | -3.18763000 | 1.29825300  | -0.00002900 |
| C  | 2.11298300  | 2.85475500  | 0.00003100  |
| C  | 3.49499100  | 2.77520500  | 0.00000000  |
| C  | 1.11056000  | -2.76538900 | 0.00002200  |
| C  | -0.27179900 | -2.68753800 | -0.00001500 |
| Br | -6.00538900 | 1.54707800  | -0.00005900 |
| Br | -5.90775200 | -1.88007000 | -0.00006800 |
| Si | 1.15322800  | 4.47806000  | 0.00006300  |
| C  | 0.09395800  | 4.59570400  | -1.54665400 |
| C  | 2.41466000  | 5.88018800  | 0.00002800  |
| C  | 0.09404900  | 4.59569700  | 1.54684400  |
| Si | 2.07285500  | -4.38769500 | 0.00005700  |
| C  | 3.13237800  | -4.50286100 | 1.54671900  |
| C  | 3.13248400  | -4.50286500 | -1.54653400 |
| C  | 0.81302400  | -5.79095100 | 0.00001200  |
| H  | 8.47301400  | 1.47878300  | -0.00001700 |
| H  | 8.54372400  | -1.00147500 | -0.00001500 |
| H  | 6.42519200  | -2.29495000 | -0.00000400 |
| H  | 6.31314700  | 2.65549200  | -0.00000900 |
| H  | -3.09480000 | -2.55865000 | -0.00003900 |
| H  | -3.20406900 | 2.37841300  | -0.00002800 |
| H  | 4.22195500  | 3.56770900  | -0.00000800 |
| H  | -0.99788700 | -3.48115100 | -0.00002800 |
| H  | -0.62040500 | 3.77232000  | -1.58465700 |
| H  | -0.46624200 | 5.53444400  | -1.56135000 |
| H  | 0.70638600  | 4.55845700  | -2.45052700 |
| H  | 3.05534000  | 5.85468800  | 0.88478700  |

|   |             |             |             |
|---|-------------|-------------|-------------|
| H | 1.90028400  | 6.84459000  | 0.00002100  |
| H | 3.05531600  | 5.85466300  | -0.88474800 |
| H | -0.46611300 | 5.53445800  | 1.56160300  |
| H | -0.62034200 | 3.77233900  | 1.58486000  |
| H | 0.70652700  | 4.55839600  | 2.45068100  |
| H | 2.52025900  | -4.46519700 | 2.45077200  |
| H | 3.69288500  | -5.44145300 | 1.56203000  |
| H | 3.84610100  | -3.67883300 | 1.58293800  |
| H | 2.52042300  | -4.46525500 | -2.45062800 |
| H | 3.69302900  | -5.44143500 | -1.56177600 |
| H | 3.84617800  | -3.67881100 | -1.58273300 |
| H | 0.17222400  | -5.76653300 | 0.88471100  |
| H | 0.17225400  | -5.76650100 | -0.88470700 |
| H | 1.32844700  | -6.75479900 | 0.00000300  |

## 4a:

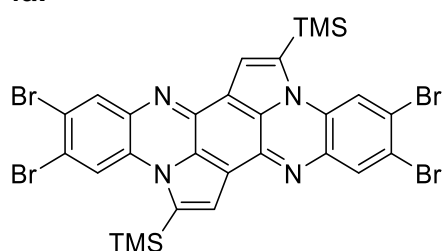

|    |             |             |             |
|----|-------------|-------------|-------------|
| C  | -6.00757000 | 0.19360000  | -0.00008900 |
| C  | -5.79116200 | 1.57651800  | -0.00007300 |
| C  | -4.49821800 | 2.05664000  | -0.00002800 |
| C  | -3.38629300 | 1.20125100  | 0.00000900  |
| C  | -3.62189500 | -0.20468800 | 0.00000700  |
| C  | -4.93006700 | -0.67684400 | -0.00005000 |
| N  | -2.14142900 | 1.78710200  | 0.00003300  |
| C  | -1.11269400 | 0.98212400  | 0.00004800  |
| C  | -1.26574900 | -0.43668900 | 0.00005100  |
| N  | -2.50013100 | -1.04290400 | 0.00004700  |
| C  | 0.27170300  | 1.40320200  | 0.00005400  |
| C  | 1.26574900  | 0.43668900  | 0.00005400  |
| C  | 1.11269400  | -0.98212500 | 0.00004200  |
| C  | -0.27170400 | -1.40320200 | 0.00004500  |
| N  | 2.50013000  | 1.04290400  | 0.00005500  |
| C  | 3.62189400  | 0.20468800  | 0.00002900  |
| C  | 3.38629200  | -1.20125100 | 0.00001800  |
| N  | 2.14142900  | -1.78710200 | 0.00002700  |
| C  | 4.93006600  | 0.67684400  | 0.00000800  |
| C  | 6.00757000  | -0.19360000 | -0.00001700 |
| C  | 5.79116100  | -1.57651800 | -0.00002200 |
| C  | 4.49821800  | -2.05663900 | -0.00000500 |
| C  | -0.94333300 | -2.64455800 | 0.00003500  |
| C  | -2.31860100 | -2.43971300 | 0.00006900  |
| C  | 0.94333300  | 2.64455800  | 0.00004800  |
| C  | 2.31860100  | 2.43971300  | 0.00007400  |
| Br | 7.22111400  | -2.82891600 | -0.00005600 |
| Br | 7.75150300  | 0.56183600  | -0.00004300 |
| Br | -7.75150400 | -0.56183500 | -0.00016500 |
| Br | -7.22111400 | 2.82891700  | -0.00012400 |
| Si | 3.52063200  | 3.90377500  | 0.00011200  |
| C  | 2.45267000  | 5.45171300  | 0.00006300  |
| C  | 4.57649800  | 3.94543100  | -1.55943100 |

|    |             |             |             |
|----|-------------|-------------|-------------|
| C  | 4.57638500  | 3.94547100  | 1.55973300  |
| Si | -3.52063100 | -3.90377700 | 0.00013100  |
| C  | -2.45266800 | -5.45171300 | -0.00003100 |
| C  | -4.57659200 | -3.94538400 | -1.55935000 |
| C  | -4.57628900 | -3.94552300 | 1.55981600  |
| H  | -4.30446700 | 3.11941100  | -0.00002300 |
| H  | -5.12828300 | -1.73286000 | -0.00007200 |
| H  | 5.12828200  | 1.73286100  | 0.00001000  |
| H  | 4.30446700  | -3.11941100 | -0.00001100 |
| H  | -0.46579300 | -3.60918300 | 0.00003200  |
| H  | 0.46579300  | 3.60918300  | 0.00004400  |
| H  | 1.81614400  | 5.51636800  | 0.88441300  |
| H  | 3.10288600  | 6.33043600  | 0.00013700  |
| H  | 1.81628600  | 5.51641000  | -0.88438600 |
| H  | 5.25338800  | 3.09883500  | -1.67480500 |
| H  | 5.18650000  | 4.85291200  | -1.56157800 |
| H  | 3.93572900  | 3.97659300  | -2.44380100 |
| H  | 5.18644200  | 4.85291400  | 1.56185900  |
| H  | 3.93555100  | 3.97673800  | 2.44405200  |
| H  | 5.25321600  | 3.09884400  | 1.67522300  |
| H  | -1.81608900 | -5.51639600 | 0.88427800  |
| H  | -3.10288300 | -6.33043700 | 0.00005300  |
| H  | -1.81633700 | -5.51638100 | -0.88452100 |
| H  | -5.25350400 | -3.09879500 | -1.67464500 |
| H  | -5.18658000 | -4.85287500 | -1.56149500 |
| H  | -3.93587800 | -3.97649900 | -2.44376100 |
| H  | -5.18636000 | -4.85295800 | 1.56194200  |
| H  | -3.93540000 | -3.97683700 | 2.44409200  |
| H  | -5.25309800 | -3.09889100 | 1.67538500  |

**4b:**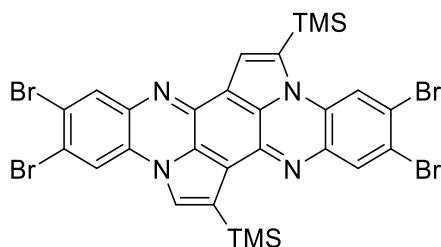

|   |             |             |             |
|---|-------------|-------------|-------------|
| C | 5.62657000  | -0.27208400 | 0.00014200  |
| C | 5.50817300  | 1.12258300  | 0.00010900  |
| C | 4.25215800  | 1.69253900  | 0.00005900  |
| C | 3.08265600  | 0.91730000  | 0.00003700  |
| C | 3.21866100  | -0.50055800 | 0.00006100  |
| C | 4.49017500  | -1.06401100 | 0.00011900  |
| N | 1.88122700  | 1.58682400  | -0.00000300 |
| C | 0.79281500  | 0.86207400  | -0.00001800 |
| C | 0.84862100  | -0.56781000 | 0.00000000  |
| N | 2.04070200  | -1.25628400 | 0.00003000  |
| C | -0.55784700 | 1.38846100  | -0.00004200 |
| C | -1.59806500 | 0.46807900  | -0.00004400 |
| C | -1.55559700 | -0.95777200 | -0.00002500 |
| C | -0.20457300 | -1.47111800 | -0.00000300 |
| N | -2.79244300 | 1.13794400  | -0.00006400 |
| C | -3.97643900 | 0.40385500  | -0.00006900 |
| C | -3.84827000 | -1.01169100 | -0.00005100 |
| N | -2.64475200 | -1.68318200 | -0.00002800 |

|    |             |             |             |
|----|-------------|-------------|-------------|
| C  | -5.23070800 | 1.00418100  | -0.00009200 |
| C  | -6.37780100 | 0.22721200  | -0.00009600 |
| C  | -6.27495900 | -1.17108100 | -0.00007800 |
| C  | -5.02957600 | -1.76780700 | -0.00005600 |
| C  | 0.38410700  | -2.75339800 | 0.00001400  |
| C  | 1.76895700  | -2.63828800 | 0.00003300  |
| C  | -1.14869400 | 2.69828900  | -0.00005700 |
| C  | -2.51794800 | 2.49079800  | -0.00007600 |
| Br | -7.80832500 | -2.29575100 | -0.00008300 |
| Br | -8.05249600 | 1.12285000  | -0.00012800 |
| Br | 7.31265600  | -1.14856600 | 0.00022100  |
| Br | 7.02252900  | 2.27116600  | 0.00013500  |
| Si | -0.34764900 | 4.40748700  | -0.00006700 |
| C  | 0.69352400  | 4.62467900  | -1.54807900 |
| C  | 0.69351300  | 4.62473100  | 1.54794500  |
| C  | -1.73782200 | 5.68105000  | -0.00008200 |
| Si | 2.87015300  | -4.18033300 | -0.00000900 |
| C  | 1.69995800  | -5.65247900 | -0.00003500 |
| C  | 3.92075000  | -4.29455300 | 1.55953900  |
| C  | 3.92071600  | -4.29444300 | -1.55958600 |
| H  | 4.13682100  | 2.76657400  | 0.00003700  |
| H  | 4.61314900  | -2.13130700 | 0.00015100  |
| H  | -5.32239700 | 2.08014700  | -0.00010600 |
| H  | -4.93487200 | -2.84401200 | -0.00004200 |
| H  | -0.15583300 | -3.68444900 | 0.00000900  |
| H  | -3.31510200 | 3.21303800  | -0.00009600 |
| H  | 0.08534000  | 4.53142500  | -2.45074100 |
| H  | 1.16201600  | 5.61236200  | -1.56223600 |
| H  | 1.48275800  | 3.87308800  | -1.58935400 |
| H  | 0.08535900  | 4.53132300  | 2.45061100  |
| H  | 1.16184600  | 5.61248800  | 1.56215500  |
| H  | 1.48286500  | 3.87326000  | 1.58916400  |
| H  | -2.37309800 | 5.59549300  | -0.88491500 |
| H  | -2.37322200 | 5.59537700  | 0.88465100  |
| H  | -1.31726600 | 6.68989000  | 0.00001700  |
| H  | 1.06067100  | -5.67443700 | -0.88446700 |
| H  | 2.28969500  | -6.57287200 | -0.00001800 |
| H  | 1.06062900  | -5.67443500 | 0.88436800  |
| H  | 4.65730400  | -3.49912200 | 1.67365200  |
| H  | 4.46353500  | -5.24376200 | 1.56254200  |
| H  | 3.27990300  | -4.27837600 | 2.44422900  |
| H  | 4.46350300  | -5.24365000 | -1.56268000 |
| H  | 3.27984800  | -4.27819500 | -2.44426100 |
| H  | 4.65726200  | -3.49899800 | -1.67365000 |

**4c:**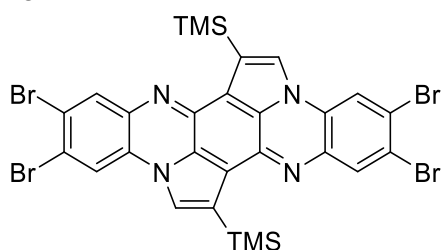

|   |            |             |            |
|---|------------|-------------|------------|
| C | 5.95507800 | 0.76447300  | 0.00006600 |
| C | 5.96843900 | -0.63738500 | 0.00005800 |
| C | 4.77668900 | -1.33533900 | 0.00002900 |

|    |             |             |             |
|----|-------------|-------------|-------------|
| C  | 3.53680100  | -0.67932800 | 0.00000200  |
| C  | 3.54738600  | 0.74080300  | 0.00000900  |
| C  | 4.74742200  | 1.44346300  | 0.00004300  |
| N  | 2.39169900  | -1.44572200 | -0.00001900 |
| C  | 1.24126000  | -0.81899700 | -0.00003700 |
| C  | 1.16828400  | 0.60959300  | -0.00004000 |
| N  | 2.30666900  | 1.37265300  | -0.00001300 |
| C  | -0.06141500 | -1.45069000 | -0.00005200 |
| C  | -1.16828400 | -0.60959300 | -0.00003700 |
| C  | -1.24126000 | 0.81899700  | -0.00003000 |
| C  | 0.06141500  | 1.45069000  | -0.00004900 |
| N  | -2.30666900 | -1.37265300 | -0.00001100 |
| C  | -3.54738600 | -0.74080300 | 0.00001500  |
| C  | -3.53680100 | 0.67932800  | 0.00001300  |
| N  | -2.39169900 | 1.44572200  | -0.00000800 |
| C  | -4.74742200 | -1.44346300 | 0.00004700  |
| C  | -5.95507800 | -0.76447300 | 0.00007500  |
| C  | -5.96843900 | 0.63738500  | 0.00007200  |
| C  | -4.77668900 | 1.33533900  | 0.00004300  |
| C  | 0.54845100  | 2.80202200  | -0.00009100 |
| C  | 1.92867900  | 2.70030800  | 0.00000600  |
| C  | -0.54845100 | -2.80202200 | -0.00009000 |
| C  | -1.92867900 | -2.70030800 | 0.00000100  |
| Br | -7.58929700 | 1.63134800  | 0.00011300  |
| Br | -7.54956000 | -1.79574800 | 0.00011800  |
| Br | 7.54956000  | 1.79574800  | 0.00011100  |
| Br | 7.58929700  | -1.63134800 | 0.00009400  |
| Si | -0.38482200 | 4.44293400  | -0.00017500 |
| C  | -1.44048000 | 4.57500700  | -1.54774400 |
| C  | 0.90099600  | 5.82161000  | -0.00006400 |
| C  | -1.44074400 | 4.57499500  | 1.54721600  |
| Si | 0.38482200  | -4.44293400 | -0.00017100 |
| C  | 1.44073500  | -4.57499800 | 1.54722600  |
| C  | 1.44048900  | -4.57500400 | -1.54773400 |
| C  | -0.90099600 | -5.82161000 | -0.00006900 |
| H  | 4.77445500  | -2.41561600 | 0.00002600  |
| H  | 4.74956600  | 2.52325500  | 0.00005100  |
| H  | -4.74956600 | -2.52325500 | 0.00005100  |
| H  | -4.77445500 | 2.41561600  | 0.00004400  |
| H  | 2.66838400  | 3.48117500  | 0.00003900  |
| H  | -2.66838400 | -3.48117500 | 0.00003100  |
| H  | -2.16872100 | 3.76393900  | -1.58616900 |
| H  | -1.98481200 | 5.52298500  | -1.56351100 |
| H  | -0.82801000 | 4.52739200  | -2.45106900 |
| H  | 1.54098300  | 5.78580200  | 0.88480900  |
| H  | 0.40310400  | 6.79460200  | -0.00011500 |
| H  | 1.54114500  | 5.78579100  | -0.88481900 |
| H  | -1.98506400 | 5.52298000  | 1.56290600  |
| H  | -2.16900500 | 3.76393800  | 1.58550400  |
| H  | -0.82843000 | 4.52735500  | 2.45064600  |
| H  | 0.82841600  | -4.52736500 | 2.45065300  |
| H  | 1.98506000  | -5.52298100 | 1.56291400  |
| H  | 2.16899300  | -3.76393800 | 1.58552200  |
| H  | 0.82802400  | -4.52738700 | -2.45106300 |
| H  | 1.98482100  | -5.52298200 | -1.56350000 |
| H  | 2.16873000  | -3.76393600 | -1.58615400 |

|   |             |             |             |
|---|-------------|-------------|-------------|
| H | -1.54099000 | -5.78580200 | 0.88480000  |
| H | -1.54113900 | -5.78579200 | -0.88482900 |
| H | -0.40310500 | -6.79460200 | -0.00011600 |

**5c:**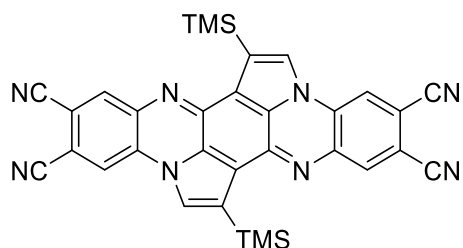

|    |             |             |             |
|----|-------------|-------------|-------------|
| C  | -5.94204900 | 0.87543700  | -0.00000700 |
| C  | -5.97945900 | -0.54098000 | -0.00000600 |
| C  | -4.79335000 | -1.25737300 | -0.00000300 |
| C  | -3.54437500 | -0.61924700 | -0.00000100 |
| C  | -3.53058800 | 0.80479100  | -0.00000200 |
| C  | -4.71652900 | 1.53050800  | -0.00000500 |
| N  | -2.41559900 | -1.40303600 | 0.00000100  |
| C  | -1.25278500 | -0.79627000 | 0.00000200  |
| C  | -1.15581400 | 0.63001900  | 0.00000200  |
| N  | -2.28163600 | 1.41291600  | -0.00000100 |
| C  | 0.03610300  | -1.45233700 | 0.00000300  |
| C  | 1.15581400  | -0.63001900 | 0.00000200  |
| C  | 1.25278500  | 0.79627000  | 0.00000000  |
| C  | -0.03610300 | 1.45233700  | 0.00000200  |
| N  | 2.28163600  | -1.41291600 | -0.00000100 |
| C  | 3.53058800  | -0.80479100 | -0.00000400 |
| C  | 3.54437500  | 0.61924700  | -0.00000500 |
| N  | 2.41559900  | 1.40303500  | -0.00000300 |
| C  | 4.71652900  | -1.53050800 | -0.00000700 |
| C  | 5.94204900  | -0.87543700 | -0.00000900 |
| C  | 5.97945900  | 0.54098000  | -0.00001100 |
| C  | 4.79335000  | 1.25737300  | -0.00000800 |
| C  | -0.49916400 | 2.81363000  | 0.00000500  |
| C  | -1.87920500 | 2.73569600  | -0.00000300 |
| C  | 0.49916400  | -2.81363000 | 0.00000700  |
| C  | 1.87920500  | -2.73569600 | -0.00000100 |
| Si | 0.46037100  | 4.44608700  | 0.00000900  |
| C  | 1.51382200  | 4.55253600  | 1.54958000  |
| C  | -0.80907800 | 5.83672100  | -0.00000100 |
| C  | 1.51384300  | 4.55252700  | -1.54954800 |
| Si | -0.46037100 | -4.44608700 | 0.00001300  |
| C  | -1.51384300 | -4.55253000 | -1.54954400 |
| C  | -1.51382200 | -4.55253300 | 1.54958400  |
| C  | 0.80907800  | -5.83672100 | 0.00000500  |
| C  | 7.22396500  | 1.24239200  | -0.00001500 |
| N  | 8.21483600  | 1.82967600  | -0.00001300 |
| C  | 7.14139100  | -1.64839000 | -0.00001100 |
| N  | 8.09215400  | -2.29930800 | -0.00001900 |
| C  | -7.14139100 | 1.64839000  | -0.00001000 |
| N  | -8.09215400 | 2.29930700  | -0.00001100 |
| C  | -7.22396500 | -1.24239200 | -0.00000800 |
| N  | -8.21483600 | -1.82967600 | -0.00001000 |
| H  | -4.80978000 | -2.33787800 | -0.00000300 |
| H  | -4.70028800 | 2.61059200  | -0.00000600 |

|   |             |             |             |
|---|-------------|-------------|-------------|
| H | 4.70028800  | -2.61059200 | -0.00000600 |
| H | 4.80978000  | 2.33787800  | -0.00000900 |
| H | -2.60463200 | 3.52987200  | -0.00000700 |
| H | 2.60463200  | -3.52987200 | -0.00000300 |
| H | 2.23046700  | 3.73135600  | 1.58933300  |
| H | 2.07265600  | 5.49181000  | 1.56884200  |
| H | 0.89910200  | 4.51336800  | 2.45166400  |
| H | -1.44905800 | 5.81037300  | -0.88514600 |
| H | -0.29897700 | 6.80324900  | 0.00001500  |
| H | -1.44908700 | 5.81035900  | 0.88512300  |
| H | 2.07265300  | 5.49181500  | -1.56882400 |
| H | 2.23050800  | 3.73136400  | -1.58927100 |
| H | 0.89913700  | 4.51332100  | -2.45164000 |
| H | -0.89913600 | -4.51333600 | -2.45163600 |
| H | -2.07266100 | -5.49181300 | -1.56881400 |
| H | -2.23050100 | -3.73136100 | -1.58927400 |
| H | -0.89910200 | -4.51335000 | 2.45166800  |
| H | -2.07264600 | -5.49181200 | 1.56885400  |
| H | -2.23047500 | -3.73136000 | 1.58932900  |
| H | 1.44906300  | -5.81037000 | -0.88513700 |
| H | 1.44908300  | -5.81036100 | 0.88513200  |
| H | 0.29897700  | -6.80324900 | 0.00001500  |

**6c:**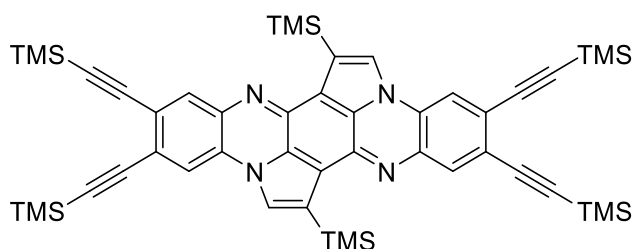

|   |             |             |             |
|---|-------------|-------------|-------------|
| C | 5.98156000  | -0.68304900 | -0.00201100 |
| C | 5.97613200  | 0.74255700  | -0.00156900 |
| C | 4.75502200  | 1.41612200  | -0.00212800 |
| C | 3.55355000  | 0.72094500  | -0.00293800 |
| C | 3.53453200  | -0.70175200 | -0.00319600 |
| C | 4.76924600  | -1.36328900 | -0.00281900 |
| N | 2.31507100  | 1.35846400  | -0.00331700 |
| C | 1.17200900  | 0.60296700  | -0.00350100 |
| C | 1.23629100  | -0.82562400 | -0.00364900 |
| N | 2.38366800  | -1.45908700 | -0.00361100 |
| C | 0.06971900  | 1.45042600  | -0.00353300 |
| C | -1.23647800 | 0.82702500  | -0.00342300 |
| C | -1.17228900 | -0.60156100 | -0.00367100 |
| C | -0.06998700 | -1.44903900 | -0.00379100 |
| N | -2.38376000 | 1.46059200  | -0.00294000 |
| C | -3.53466000 | 0.70339200  | -0.00264400 |
| C | -3.55392300 | -0.71930500 | -0.00310000 |
| N | -2.31543900 | -1.35696800 | -0.00363500 |
| C | -4.76915200 | 1.36523800  | -0.00163700 |
| C | -5.98162700 | 0.68537200  | -0.00111100 |
| C | -5.97659700 | -0.74023300 | -0.00186300 |
| C | -4.75562200 | -1.41416100 | -0.00280900 |
| C | -0.56590400 | -2.79734400 | -0.00384400 |
| C | -1.94560200 | -2.68686200 | -0.00376800 |
| C | 0.56551600  | 2.79877200  | -0.00348600 |

|    |              |             |             |
|----|--------------|-------------|-------------|
| C  | 1.94520000   | 2.68836300  | -0.00333600 |
| C  | -7.18341900  | -1.48755600 | -0.00136800 |
| C  | -7.19925100  | 1.41921700  | 0.00031500  |
| C  | 7.19957400   | -1.41635800 | -0.00125100 |
| C  | 7.18265900   | 1.49022600  | -0.00040800 |
| C  | -8.19828900  | -2.15289200 | -0.00116500 |
| C  | -8.22138600  | 2.07222700  | 0.00174300  |
| C  | 8.19729300   | 2.15585200  | 0.00074800  |
| C  | 8.22224800   | -2.06859000 | -0.00063100 |
| Si | 0.35840300   | -4.44153100 | -0.00382600 |
| C  | 1.41451300   | -4.58177600 | 1.54310800  |
| C  | 1.41439200   | -4.58198000 | -1.55078500 |
| C  | -0.93363000  | -5.81539000 | -0.00359100 |
| Si | -0.35892100  | 4.44293900  | -0.00390900 |
| C  | -1.41492600  | 4.58363600  | 1.54303200  |
| C  | -1.41499400  | 4.58264700  | -1.55089800 |
| C  | 0.93299700   | 5.81686600  | -0.00439000 |
| Si | -9.74075700  | -3.15677900 | 0.00338900  |
| C  | -10.03632000 | -3.78397600 | 1.74947800  |
| C  | -9.51385100  | -4.59714900 | -1.18130100 |
| C  | -11.16400000 | -2.06534500 | -0.55309500 |
| Si | -9.77103700  | 3.06387700  | 0.00426700  |
| C  | -10.76598500 | 2.62102700  | -1.52620300 |
| C  | -9.30825700  | 4.88443800  | -0.01653900 |
| C  | -10.73988800 | 2.65122800  | 1.56023000  |
| Si | 9.74389100   | 3.15371300  | 0.00307400  |
| C  | 9.27329000   | 4.97244100  | -0.02304100 |
| C  | 10.74110200  | 2.71013600  | -1.52519600 |
| C  | 10.71014900  | 2.74805800  | 1.56200100  |
| Si | 9.76881200   | -3.06467300 | 0.00472300  |
| C  | 10.06591200  | -3.69403400 | 1.74985500  |
| C  | 11.18926500  | -1.96594300 | -0.54671100 |
| C  | 9.55243900   | -4.50359000 | -1.18348100 |
| H  | 4.76052900   | 2.49656500  | -0.00178300 |
| H  | 4.75959000   | -2.44405700 | -0.00309300 |
| H  | -4.75924600  | 2.44601100  | -0.00114500 |
| H  | -4.76137200  | -2.49459900 | -0.00329600 |
| H  | -2.69057900  | -3.46257400 | -0.00380600 |
| H  | 2.69015200   | 3.46410200  | -0.00330100 |
| H  | 0.80286700   | -4.53053500 | 2.44682400  |
| H  | 1.95316800   | -5.53306300 | 1.55801600  |
| H  | 2.14741900   | -3.77485400 | 1.58055300  |
| H  | 0.80266500   | -4.53087800 | -2.45445400 |
| H  | 1.95308900   | -5.53324100 | -1.56563700 |
| H  | 2.14728900   | -3.77505900 | -1.58841700 |
| H  | -1.57355800  | -5.77609200 | 0.88119100  |
| H  | -1.57377800  | -5.77624800 | -0.88821700 |
| H  | -0.44014900  | -6.79067800 | -0.00357100 |
| H  | -0.80316900  | 4.53295500  | 2.44670700  |
| H  | -1.95381000  | 5.53479500  | 1.55752700  |
| H  | -2.14765900  | 3.77658100  | 1.58090000  |
| H  | -0.80327700  | 4.53130600  | -2.45456400 |
| H  | -1.95381500  | 5.53383100  | -1.56602700 |
| H  | -2.14779400  | 3.77562500  | -1.58819100 |
| H  | 0.43941500   | 6.79210300  | -0.00470500 |
| H  | 1.57308400   | 5.77803600  | 0.88029200  |



|   |              |             |             |
|---|--------------|-------------|-------------|
| H | 1.57304100   | 5.77743800  | -0.88907500 |
| H | -10.14555500 | -2.95552300 | 2.45225600  |
| H | -10.94720800 | -4.38670400 | 1.79516200  |
| H | -9.20573400  | -4.40457600 | 2.09198900  |
| H | -9.31920300  | -4.24576100 | -2.19663000 |
| H | -10.41083300 | -5.22140100 | -1.20781900 |
| H | -8.67538400  | -5.22835200 | -0.87958600 |
| H | -11.29450600 | -1.21663200 | 0.12119200  |
| H | -10.98938500 | -1.67217800 | -1.55659500 |
| H | -12.10070800 | -2.62849100 | -0.57001500 |
| H | -11.01881300 | 1.55896500  | -1.53722900 |
| H | -11.69884700 | 3.18996200  | -1.56020100 |
| H | -10.20516900 | 2.84000000  | -2.43714200 |
| H | -8.71108300  | 5.14944100  | 0.85842000  |
| H | -10.20323500 | 5.51210900  | -0.01502700 |
| H | -8.72581600  | 5.13280400  | -0.90618800 |
| H | -10.99003900 | 1.58910500  | 1.59805600  |
| H | -10.16479200 | 2.89001400  | 2.45715600  |
| H | -11.67352900 | 3.21861400  | 1.59776900  |
| H | 8.67432100   | 5.23782600  | 0.85061800  |
| H | 10.16586100  | 5.60348400  | -0.02178800 |
| H | 8.69175800   | 5.21676900  | -0.91444200 |
| H | 10.99663400  | 1.64874600  | -1.53325200 |
| H | 11.67248700  | 3.28147200  | -1.55913100 |
| H | 10.18103400  | 2.92551100  | -2.43743100 |
| H | 11.64242000  | 3.31769200  | 1.59928300  |
| H | 10.13313300  | 2.98815900  | 2.45732300  |
| H | 10.96251500  | 1.68663800  | 1.60318100  |
| H | 9.23700700   | -4.31811000 | 2.09007300  |
| H | 10.97896100  | -4.29350700 | 1.79548900  |
| H | 10.17112500  | -2.86654900 | 2.45443700  |
| H | 11.01480200  | -1.57130200 | -1.54970700 |
| H | 12.12838300  | -2.52508400 | -0.56337900 |
| H | 11.31533600  | -1.11825500 | 0.12981100  |
| H | 10.45184600  | -5.12445300 | -1.20820100 |
| H | 8.71496400   | -5.13794400 | -0.88579100 |
| H | 9.35946800   | -4.15091500 | -2.19868800 |

## 7 Device Fabrication and Measurement

A sliced, highly p-doped silicon wafer with 100 nm thick thermally grown SiO<sub>2</sub> was cleaned with ultrasonication in acetone, isopropanol and ethanol successively for 10 min. It was washed with water and dried in a stream of nitrogen. The wafer was placed in freshly produced Caro's acid and got heated to 100 °C for 20 min. After cleaning with water and drying a 150 mM solution of Al(NO<sub>3</sub>)<sub>3</sub>·9H<sub>2</sub>O in ethanol was spin-coated (5000 rpm; 40 s) onto the substrate. Right after that, the wafer was heated to 300 °C for 30 min. For the formation of the SAM the substrate was placed in a 15.0 mM solution of 12-cyclohexyldodecylphosphonic acid (CDPA)<sup>[12]</sup> in isopropanol for 16 h. Then, the substrate was cleaned with ultra-sonication in isopropanol for 10 min, rinsed with water and dried in a stream of nitrogen. The capacitance of the dielectric layer is 26.5 nF cm<sup>-2</sup>.

Drop-casted films were prepared by dropping the prepared solution onto the substrate and covering the wafer against drafts. To form the electrodes, a 40 nm thick layer of gold was deposited through a shadow mask onto the organic layer in a vacuum evaporator at a pressure below 2x10<sup>-6</sup> bar. Transistor characteristics were measured with a semiconductor characterization system (Keithley 4200-SCS) in a nitrogen filled glove box. The field effect mobilities were determined in the saturated regime using the equation  $I_{DS}=(W/2L)C_i\mu(V_G-V_{th})^2$ , where  $I_{DS}$  is the source-drain current,  $W$  is the channel width,  $L$  the channel length,  $C_i$  is the capacitance per unit area of the gate dielectric layer,  $\mu$  is the field effect mobility, and  $V_{th}$  is the threshold voltage.

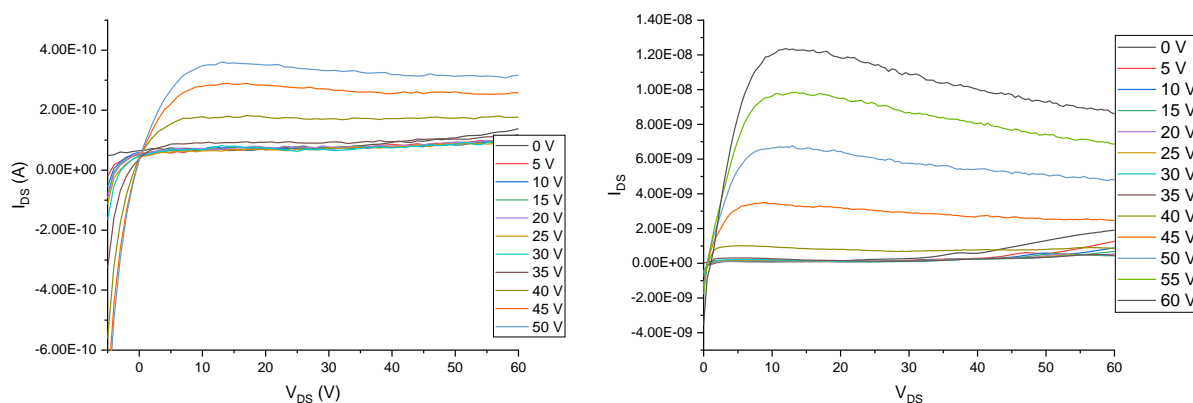

Figure S53. Output characteristics of 5c (left) and 3d (right).

## 8 Stability Measurements

Stabilities of the compound were measured by time dependent absorption spectroscopy. The solutions of the compounds in DCM were irradiated with UV light (365nm) and white light under ambient conditions. In the figure below our LED panel is shown. The yellow LED were used for the measurement. All other LED were switched off.

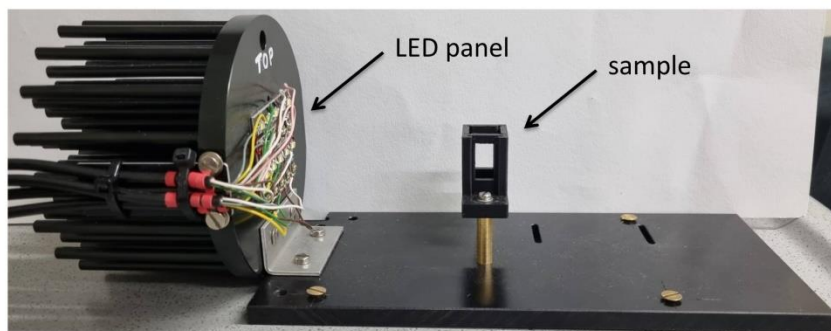

|       |       |       |       |       |
|-------|-------|-------|-------|-------|
| UV    | UV    | UV    | UV    | UV    |
| white | white | white | white | white |
| UV    | UV    | UV    | UV    | UV    |
| white | white | white | white | white |

LED panel

LED panel:

UV:

UV-LED: Nichia NCSU276C UV SMD-LED, 10x10mm Platine, 1050mW, 365nm

white:

white light LED: Cree XP-G2 S2 SMD-LED, 10x10mm Platine, 338lm, 6200K, CRI 70

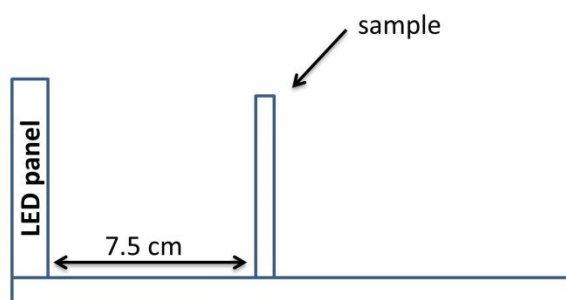

**Figure S54.** Photograph and schematic structure of the LED pane which was used for the stability measurements.

## 9 References

- [1] G. R. Fulmer, A. J. M. Miller, N. H. Sherden, H. E. Gottlieb, A. Nudelman, B. M. Stoltz, J. E. Bercaw, K. I. Goldberg, *Organometallics* **2010**, *29*, 2176–2179.
- [2] B. D. Lindner, J. U. Engelhart, O. Tverskoy, A. L. Appleton, F. Rominger, A. Peters, H.-J. Himmel, U. H. F. Bunz, *Angew. Chem. Int. Ed.* **2011**, *50*, 8588–8591; *Angew. Chem.* **2011**, *123*, 8747–8750.
- [3] M. J. Fleming, H. A. McManus, A. Rudolph, W. H. Chan, J. Ruiz, C. Dockendorff, M. Lautens, *Chem. Eur. J.* **2008**, *14*, 2112–2124.
- [4] H. Reiss, L. Ji, J. Han, S. Koser, O. Tverskoy, J. Freudenberger, F. Hinkel, M. Moos, A. Friedrich, I. Krummenacher, C. Lambert, H. Braunschweig, A. Dreuw, T. B. Marder, U. H. F. Bunz, *Angew. Chem. Int. Ed.* **2018**, *57*, 9543–9547; *Angew. Chem.* **2018**, *130*, 9688–9692.
- [5] J. U. Engelhart, F. Paulus, M. Schaffroth, V. Vasilenko, O. Tverskoy, F. Rominger, U. H. F. Bunz, *J. Org. Chem.* **2016**, *81*, 1198–1205.
- [6] *Gaussian 16, Revision B.01*, M. J. Frisch, G. W. Trucks, H. B. Schlegel, G. E. Scuseria, M. A. Robb, J. R. Cheeseman, G. Scalmani, V. Barone, G. A. Petersson, H. Nakatsuji, X. Li, M. Caricato, A. V. Marenich, J. Bloino, B. G. Janesko, R. Gomperts, B. Mennucci, H. P. Hratchian, J. V. Ortiz, A. F. Izmaylov, J. L. Sonnenberg, D. Williams-Young, F. Ding, F. Lipparini, F. Egidi, J. Goings, B. Peng, A. Petrone, T. Henderson, D. Ranasinghe, V. G. Zakrzewski, J. Gao, N. Rega, G. Zheng, W. Liang, M. Hada, M. Ehara, K. Toyota, R. Fukuda, J. Hasegawa, M. Ishida, T. Nakajima, Y. Honda, O. Kitao, H. Nakai, T. Vreven, K. Throssell, J. A. Montgomery, Jr., J. E. Peralta, F. Ogliaro, M. J. Bearpark, J. J. Heyd, E. N. Brothers, K. N. Kudin, V. N. Staroverov, T. A. Keith, R. Kobayashi, J. Normand, K. Raghavachari, A. P. Rendell, J. C. Burant, S. S. Iyengar, J. Tomasi, M. Cossi, J. M. Millam, M. Klene, C. Adamo, R. Cammi, J. W. Ochterski, R. L. Martin, K. Morokuma, O. Farkas, J. B. Foresman, and D. J. Fox, Gaussian, Inc., Wallingford CT, **2016**.
- [7] a) ADF 2021.1, SCM, Theoretical Chemistry, Vrije Universiteit, Amsterdam, The Netherlands, E.J. Baerends, T. Ziegler, A.J. Atkins, J. Autschbach, O. Baseggio, D. Bashford, A. Bérces, F.M. Bickelhaupt, C. Bo, P.M. Boerrigter, C. Cappelli, L. Cavallo, C. Daul, D.P. Chong, D.V. Chulhai, L. Deng, R.M. Dickson, J.M. Dieterich, F. Egidi, D.E. Ellis, M. van Faassen, L. Fan, T.H. Fischer, A. Förster, C. Fonseca Guerra, M. Franchini, A. Ghysels, A. Giammona, S.J.A. van Gisbergen, A. Goetz, A.W. Götz, J.A. Groeneveld, O.V. Gritsenko, M. Grüning, S. Gusarov, F.E. Harris, P. van den Hoek, Z. Hu, C.R. Jacob, H. Jacobsen, L. Jensen, L. Joubert, J.W. Kaminski, G. van Kessel, C. König, F. Kootstra, A. Kovalenko, M.V. Krykunov, P. Lafiosca, E. van Lenthe, D.A. McCormack, M. Medves, A. Michalak, M. Mitoraj, S.M. Morton, J. Neugebauer, V.P. Nicu, L. Noodleman, V.P. Osinga, S. Patchkovskii, M. Pavanello, C.A. Peebles, P.H.T. Philipsen, D. Post, C.C. Pye, H. Ramanantoanina, P. Ramos, W. Ravenek, M. Reimann, J.I. Rodríguez, P. Ros, R. Rüger, P.R.T. Schipper, D. Schlüns, H. van Schoot, G. Schreckenbach, J.S. Seldenthuis, M. Seth, J.G. Snijders, M. Solà, M. Stener, M. Swart, D. Swerhone, V. Tognetti, G. te Velde, P. Vernooijs, L. Versluis, L. Visscher, O. Visser, F. Wang, T.A. Wesolowski, E.M. van Wezenbeek, G. Wiesenekker, S.K. Wolff, T.K. Woo, A.L. Yakovlev; b) A. Moliterni, D. Altamura, R. Lassandro, V. Olieric, G. Ferri, F. Cardarelli, A. Camposeo, D. Pisignano, J. E. Anthony, C. Giannini, *Acta Crystallogr. B* **2020**, *76*, 427–435; c) G. te Velde, F. M. Bickelhaupt, E. J. Baerends, C. Fonseca Guerra, S. J. A. van Gisbergen, J. G. Snijders, T. Ziegler, *J. Comput. Chem.* **2001**, *22*, 931–967.
- [8] V. Stehr, J. Pfister, R. F. Fink, B. Engels, C. Deibel, *Phys. Rev. B* **2011**, *83*, 155208.
- [9] R. A. Marcus, *Rev. Mod. Phys.* **1993**, *65*, 599–610.
- [10] S.-H. Wen, an Li, J. Song, W.-Q. Deng, K.-L. Han, W. A. Goddard, *J. Phys. Chem. B* **2009**, *113*, 8813–8819.
- [11] A. N. Sokolov, S. Atahan-Evrenk, R. Mondal, H. B. Akkerman, R. S. Sánchez-Carrera, S. Granados-Focil, J. Schrier, S. C. Mannsfeld, A. P. Zoombelt, Z. Bao, A. Aspuru-Guzik, *Nat. Commun.* **2011**, *2*, 437.
- [12] M. Chu, J.-X. Fan, S. Yang, D. Liu, C. F. Ng, H. Dong, A.-M. Ren, Q. Miao, *Adv. Mater.* **2018**, *30*, e1803467.
- [13] A. Stanger, *Org. Lett.* **2022**, *24*, 1243–1246.
